# Supplementary material for: Synthesis of tetrahydrothiopyrano[2,3-b]indolesvia[3+3] annulation of nitroallylic acetates with indoline-2-thiones
Source: Royal Society of Chemistry journal article supplement (doi:10.1039/c9nj04754a), 2019-12-09
Supplement: c9nj04754a1.pdf [file c9nj04754a1.pdf]

Supplementary Information  
For

## Synthesis of Tetrahydrothiopyrano[2,3-*b*]indoles via [3+3] Annulation of Nitroallylic Acetates with Indoline-2-thiones

Pallabita Basu, Chiranjit Hazra, Thekke V. Baiju and Irishi N. N. Namboothiri\*

*Department of Chemistry and Indian Institute of Technology, Bombay, Mumbai 400 076*  
irishi@iitb.ac.in

---

### Table of Contents

| Entry |                                                               | Page |
|-------|---------------------------------------------------------------|------|
| 01    | Figure S01. <sup>1</sup> H NMR Spectrum of 3a (Major isomer)  | 04   |
| 02    | Figure S02. <sup>13</sup> C NMR Spectrum of 3a (Major isomer) | 05   |
| 03    | Figure S03. <sup>1</sup> H NMR Spectrum of 3a                 | 06   |
| 04    | Figure S04. <sup>13</sup> C NMR Spectrum of 3a                | 07   |
| 05    | Figure S05. <sup>13</sup> C-APT NMR Spectrum of 3a            | 08   |
| 06    | Figure S06. <sup>1</sup> H NMR Spectrum of 3b                 | 09   |
| 07    | Figure S07. <sup>13</sup> C NMR Spectrum of 3b                | 10   |
| 08    | Figure S08. <sup>13</sup> C-APT NMR Spectrum of 3b            | 11   |
| 09    | Figure S09. <sup>1</sup> H NMR Spectrum of 3c                 | 12   |
| 10    | Figure S10. <sup>13</sup> C NMR Spectrum of 3c                | 13   |
| 11    | Figure S11. <sup>13</sup> C-APT NMR Spectrum of 3c            | 14   |
| 12    | Figure S12. <sup>1</sup> H NMR Spectrum of 3d                 | 15   |
| 13    | Figure S13. <sup>13</sup> C NMR Spectrum of 3d                | 16   |
| 14    | Figure S14. <sup>13</sup> C-APT NMR Spectrum of 3d            | 17   |
| 15    | Figure S15. <sup>1</sup> H NMR Spectrum of 3e                 | 18   |
| 16    | Figure S16. <sup>13</sup> C NMR Spectrum of 3e                | 19   |
| 17    | Figure S17. <sup>13</sup> C-APT NMR Spectrum of 3e            | 20   |
| 18    | Figure S18. <sup>1</sup> H NMR Spectrum of 3f                 | 21   |
| 19    | Figure S19. <sup>13</sup> C NMR Spectrum of 3f                | 22   |

|    |                                                                  |    |
|----|------------------------------------------------------------------|----|
| 20 | Figure S20. $^1\text{H}$ - $^1\text{H}$ COSY NMR Spectrum of 3f  | 23 |
| 21 | Figure S21. $^1\text{H}$ - $^1\text{H}$ NOESY NMR Spectrum of 3f | 24 |
| 22 | Figure S22. $^1\text{H}$ NMR Spectrum of 3g                      | 25 |
| 23 | Figure S23. $^{13}\text{C}$ NMR Spectrum of 3g                   | 26 |
| 24 | Figure S24. $^{13}\text{C}$ -APT NMR Spectrum of 3g              | 27 |
| 25 | Figure S25. $^1\text{H}$ NMR Spectrum of 3h                      | 28 |
| 26 | Figure S26. $^{13}\text{C}$ NMR Spectrum of 3h                   | 29 |
| 27 | Figure S27. $^1\text{H}$ NMR Spectrum of 3i                      | 30 |
| 28 | Figure S28. $^{13}\text{C}$ NMR Spectrum of 3i                   | 31 |
| 29 | Figure S29. $^{13}\text{C}$ -APT NMR Spectrum of 3i              | 32 |
| 30 | Figure S30. $^1\text{H}$ NMR Spectrum of 3j (Major isomer)       | 33 |
| 31 | Figure S31. $^{13}\text{C}$ NMR Spectrum of 3j (Major isomer)    | 34 |
| 32 | Figure S32. $^1\text{H}$ NMR Spectrum of 3j                      | 35 |
| 33 | Figure S33. $^{13}\text{C}$ NMR Spectrum of 3j                   | 36 |
| 34 | Figure S34. $^{13}\text{C}$ -APT NMR Spectrum of 3j              | 37 |
| 35 | Figure S35. $^1\text{H}$ NMR Spectrum of 3k                      | 38 |
| 36 | Figure S36. $^{13}\text{C}$ NMR Spectrum of 3k                   | 39 |
| 37 | Figure S37. $^{13}\text{C}$ -APT NMR Spectrum of 3k              | 40 |
| 38 | Figure S38. $^1\text{H}$ NMR Spectrum of 3l                      | 41 |
| 39 | Figure S39. $^{13}\text{C}$ NMR Spectrum of 3l                   | 42 |
| 40 | Figure S40. $^{13}\text{C}$ -APT NMR Spectrum of 3l              | 43 |
| 41 | Figure S41. $^1\text{H}$ NMR Spectrum of 3m                      | 44 |
| 42 | Figure S42. $^{13}\text{C}$ NMR Spectrum of 3m                   | 45 |
| 43 | Figure S43. $^{13}\text{C}$ -APT NMR Spectrum of 3m              | 46 |
| 44 | Figure S44. $^1\text{H}$ NMR Spectrum of 3n                      | 47 |
| 45 | Figure S45. $^{13}\text{C}$ NMR Spectrum of 3n                   | 48 |
| 46 | Figure S46. $^{13}\text{C}$ -APT NMR Spectrum of 3n              | 49 |
| 47 | Figure S47. $^1\text{H}$ NMR Spectrum of 3o                      | 50 |
| 48 | Figure S48. $^{13}\text{C}$ NMR Spectrum of 3o                   | 51 |
| 49 | Figure S49. $^{13}\text{C}$ -APT NMR Spectrum of 3o              | 52 |
| 50 | Figure S50. $^1\text{H}$ NMR Spectrum of 3p                      | 53 |
| 51 | Figure S51. $^{13}\text{C}$ NMR Spectrum of 3p                   | 54 |
| 52 | Figure S52. $^{13}\text{C}$ -APT NMR Spectrum of 3p              | 55 |

---

---

|    |                                                            |    |
|----|------------------------------------------------------------|----|
| 53 | <b>Figure S53.</b> $^1\text{H}$ NMR Spectrum of 3q         | 56 |
| 54 | <b>Figure S54.</b> $^{13}\text{C}$ NMR Spectrum of 3q      | 57 |
| 55 | <b>Figure S55.</b> $^{13}\text{C}$ -APT NMR Spectrum of 3q | 58 |
| 56 | <b>Figure S56.</b> $^1\text{H}$ NMR Spectrum of 3r         | 59 |
| 57 | <b>Figure S57.</b> $^{13}\text{C}$ NMR Spectrum of 3r      | 60 |
| 58 | <b>Figure S58.</b> $^{13}\text{C}$ -APT NMR Spectrum of 3r | 61 |
| 59 | <b>Figure S59.</b> $^1\text{H}$ NMR Spectrum of 4          | 62 |
| 60 | <b>Figure S60.</b> $^{13}\text{C}$ NMR Spectrum of 4       | 63 |
| 61 | <b>Figure S61.</b> $^{13}\text{C}$ -APT NMR Spectrum of 4  | 64 |
| 62 | <b>Figure S62.</b> $^1\text{H}$ NMR Spectrum of 6          | 65 |
| 63 | <b>Figure S63.</b> $^{13}\text{C}$ NMR Spectrum of 6       | 66 |
| 64 | <b>Figure S64.</b> $^1\text{H}$ NMR Spectrum of 7          | 67 |
| 65 | <b>Figure S65.</b> $^{13}\text{C}$ NMR Spectrum of 7       | 68 |
| 66 | <b>Figure S66.</b> $^{13}\text{C}$ -APT NMR Spectrum of 7  | 69 |
| 67 | <b>Figure S67.</b> $^1\text{H}$ NMR Spectrum of 10         | 70 |
| 68 | <b>Figure S68.</b> $^{13}\text{C}$ NMR Spectrum of 10      | 71 |
| 69 | <b>Figure S69.</b> $^{13}\text{C}$ -APT NMR Spectrum of 10 | 72 |
| 70 | <b>Table S01.</b> X-ray Crystal Data Table of 3j           | 73 |

---

Current Data Parameters  
NAME INN-PB-71-C-1H  
EXPNO 5  
PROCNO 1

F2 - Acquisition Parameters  
Date\_ 20141226  
Time\_ 2.40  
INSTRUM spect  
PROBHD 5 mm PABBO BB-  
PULPROG zg30  
TD 54274  
SOLVENT CDC13  
NS 16  
DS 0  
SWH 8223.685 Hz  
FIDRES 0.151522 Hz  
AQ 3.2998593 sec  
RG 161  
DW 60.800 usec  
DE 6.50 usec  
TE 296.6 K  
D1 1.0000000 sec  
TD0 1

==== CHANNEL f1 =====  
NUC1 1H  
P1 14.75 usec  
PL1 -1.00 dB  
PL1W 10.56200695 W  
SFO1 400.1324710 MHz

F2 - Processing parameters  
SI 32768  
SF 400.1300098 MHz  
WDW EM  
SSB 0  
LB 0.30 Hz  
GB 0  
PC 1.00

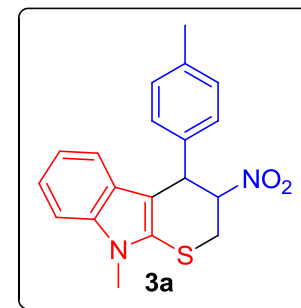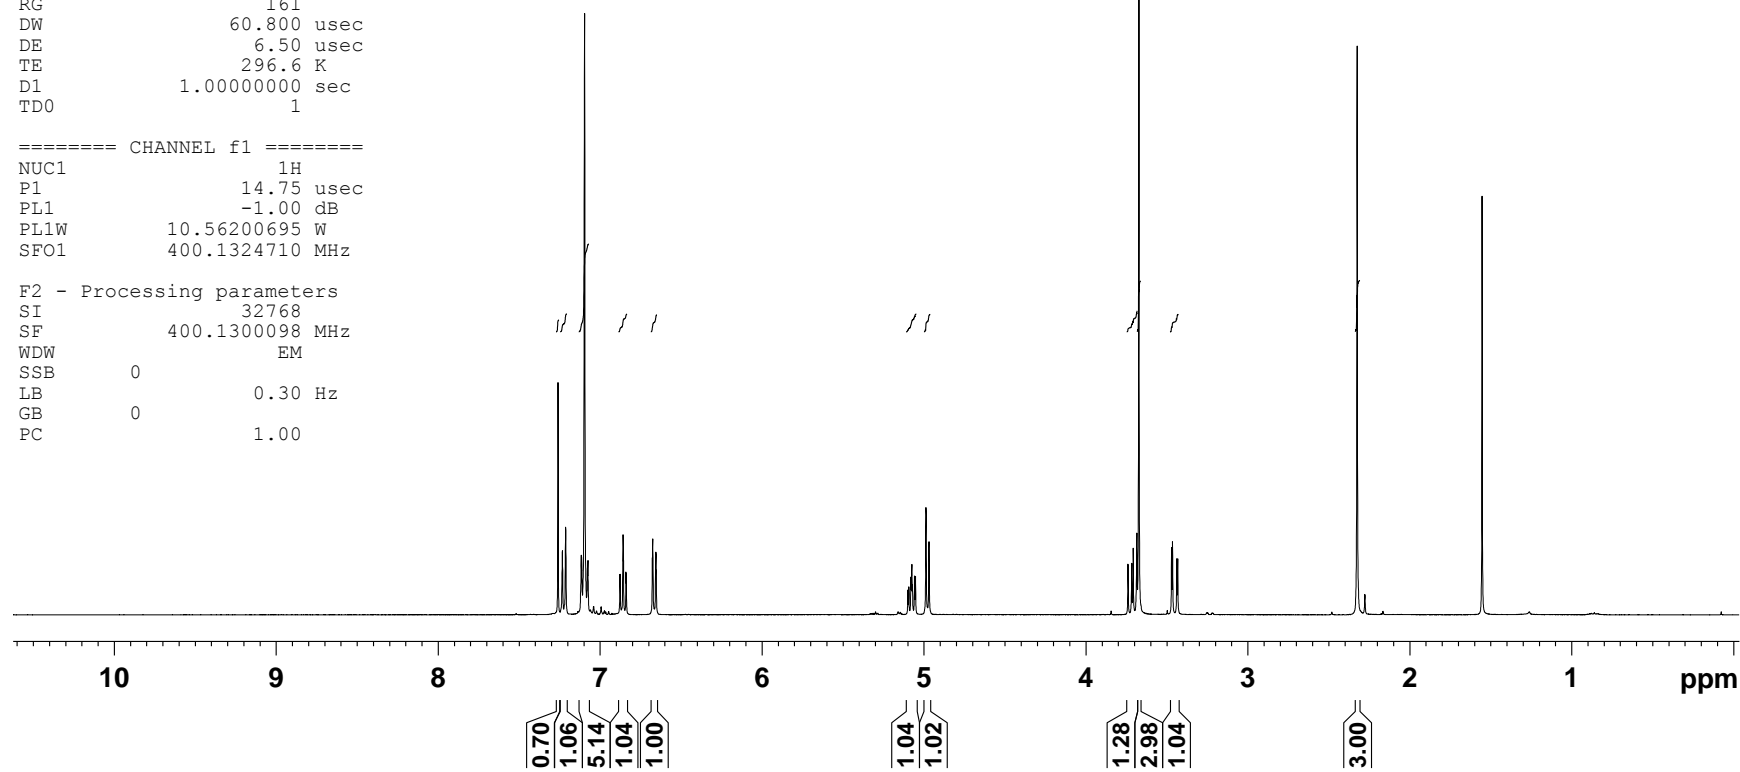

Figure S01. <sup>1</sup>H NMR Spectrum of 3a (Major isomer)

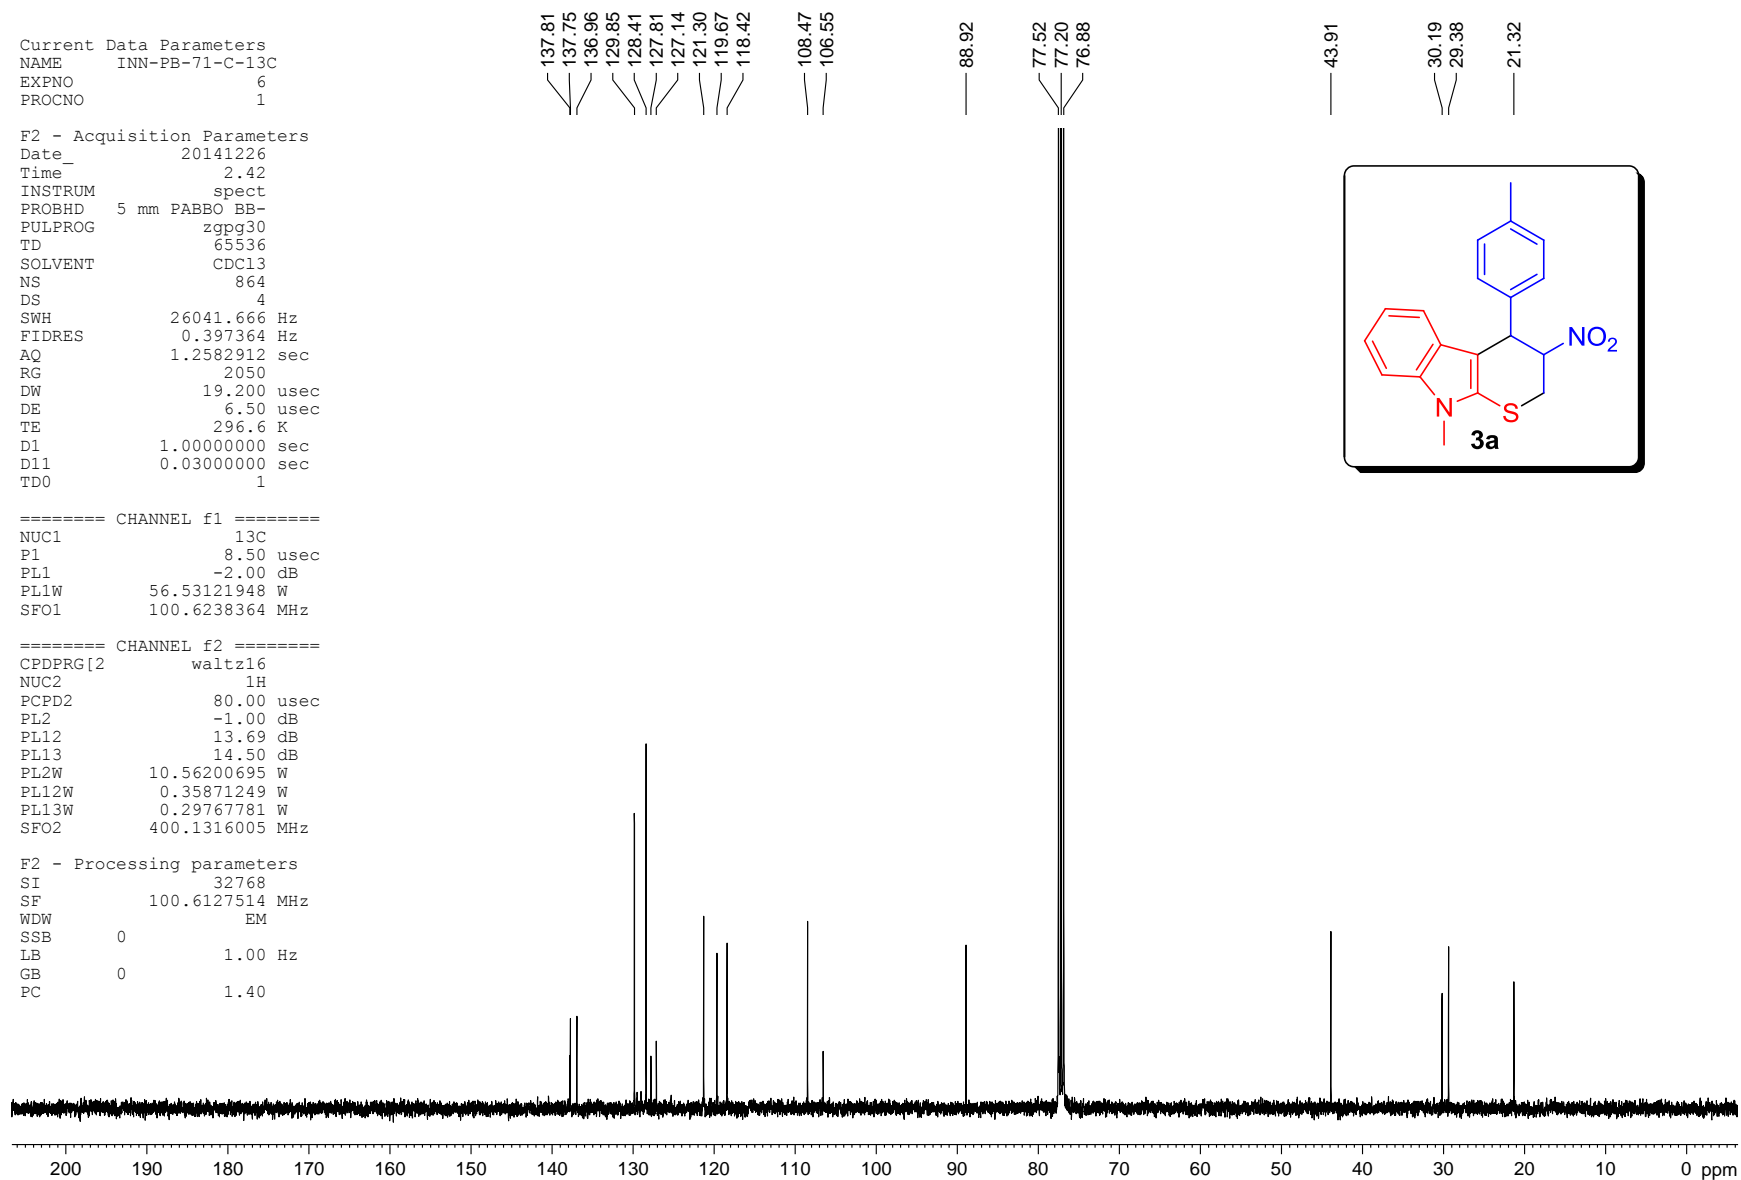

Current Data Parameters  
 NAME INN-PB-CH-37-1H  
 EXPNO 1  
 PROCNO 1

F2 - Acquisition Parameters  
 Date\_ 20170210  
 Time\_ 0.32  
 INSTRUM spect  
 PROBHD 5 mm PABBO BB/  
 PULPROG zg30  
 TD 65536  
 SOLVENT CDC13  
 NS 18  
 DS 2  
 SWH 10000.000 Hz  
 FIDRES 0.152588 Hz  
 AQ 3.2767999 sec  
 RG 30.72  
 DW 50.000 usec  
 DE 6.50 usec  
 TE 296.6 K  
 D1 1.00000000 sec  
 TD0 1

==== CHANNEL f1 =====  
 SFO1 500.1330885 MHz  
 NUC1 1H  
 P1 13.00 usec  
 PLW1 13.00000000 W

F2 - Processing parameters  
 SI 65536  
 SF 500.1300136 MHz  
 WDW EM  
 SSB 0  
 LB 0.30 Hz  
 GB 0  
 PC 1.00

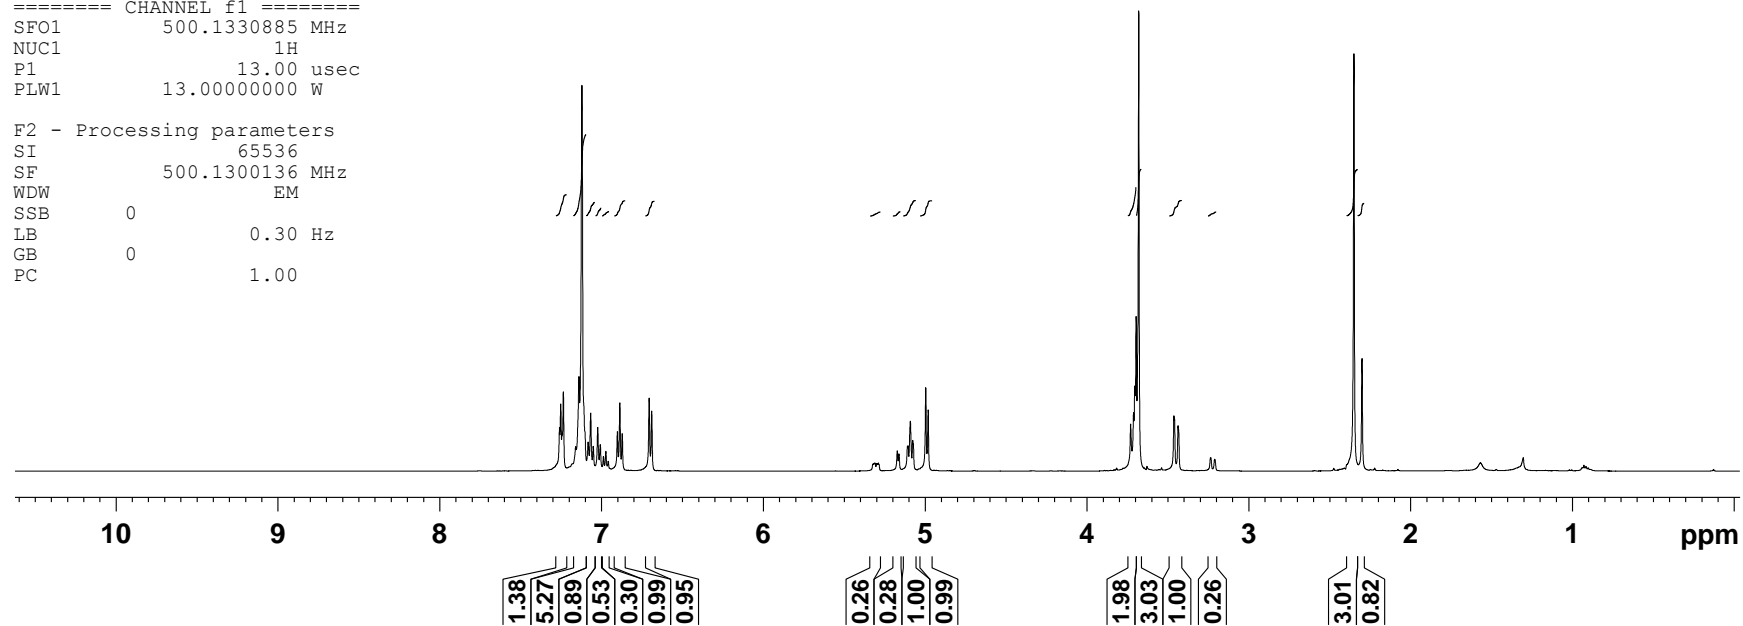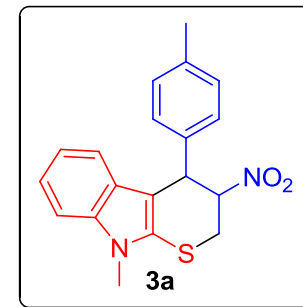

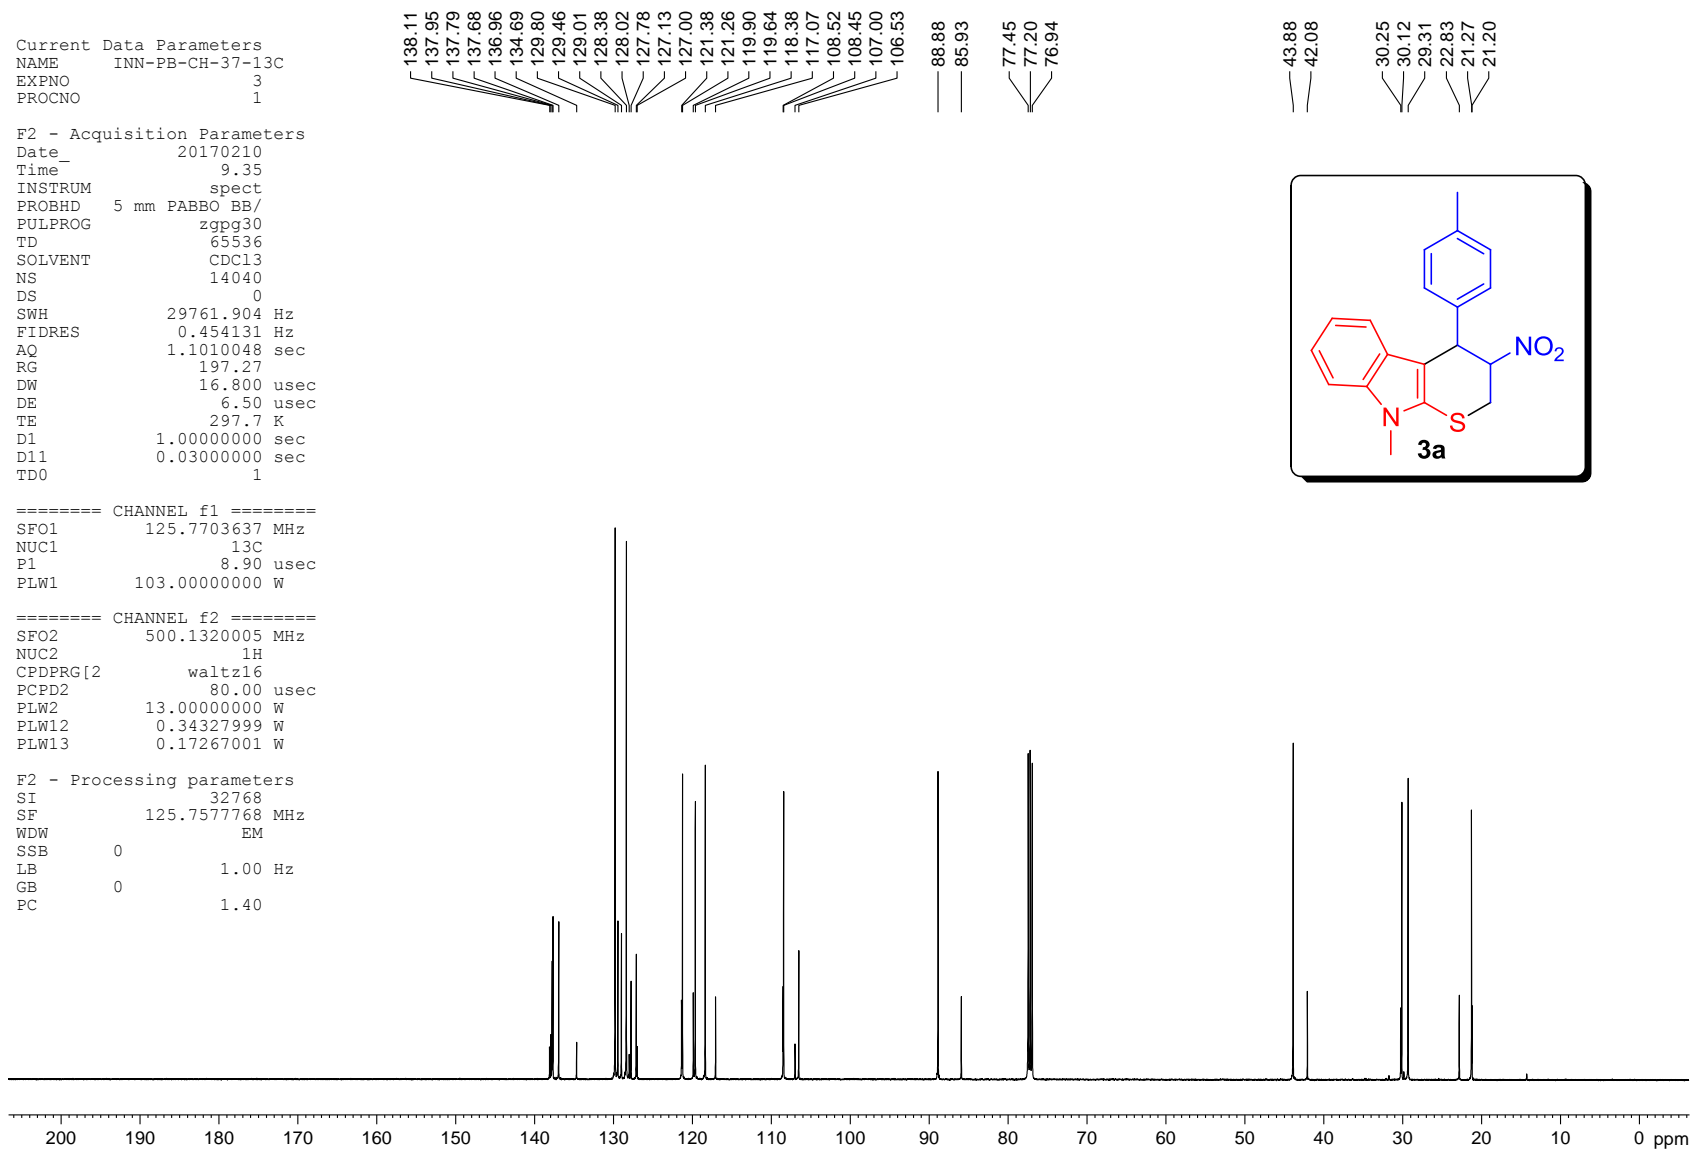

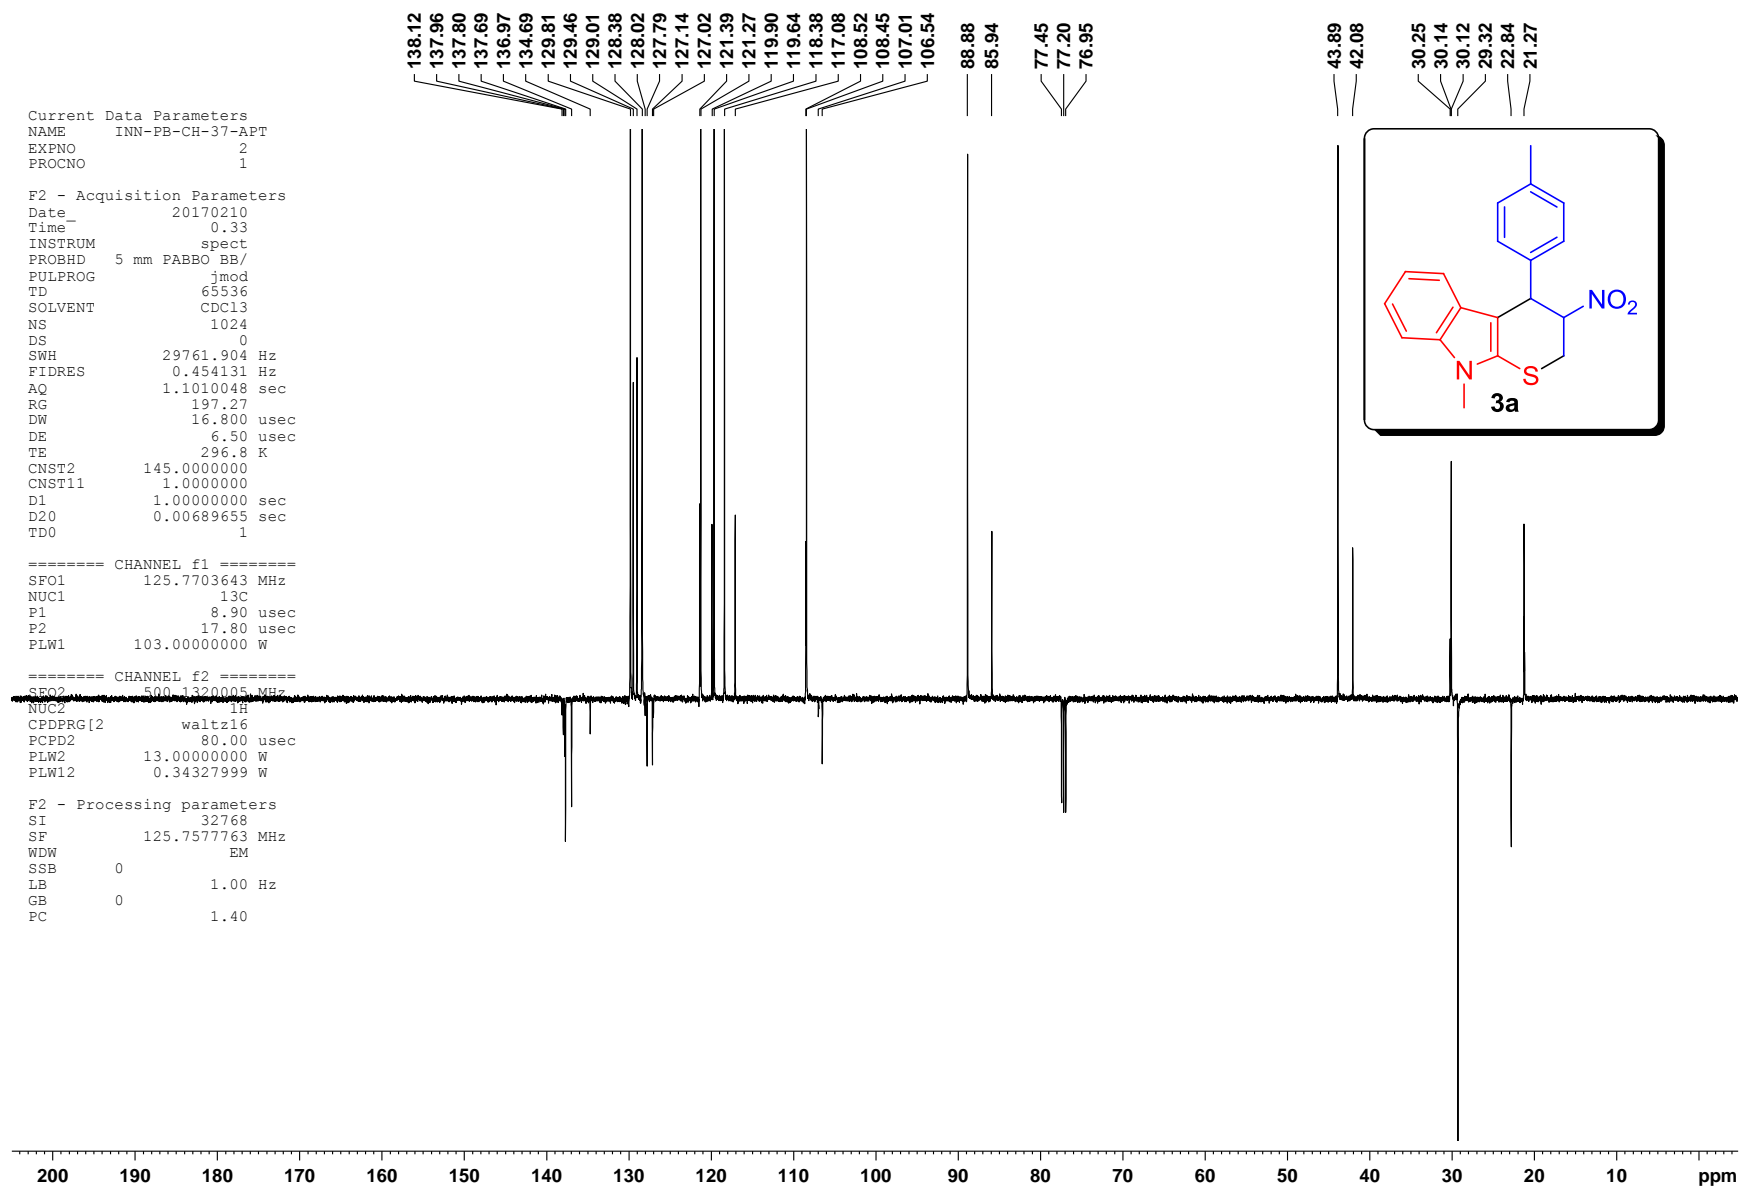Figure S05. <sup>13</sup>C-APT NMR Spectrum of 3a (major + minor, dr 80:20)



Current Data Parameters  
 NAME INN-CH-67-1H  
 EXPNO 7  
 PROCNO 1

F2 - Acquisition Parameters  
 Date\_ 20140414  
 Time\_ 19.44  
 INSTRUM spect  
 PROBHD 5 mm PABBO BB/  
 PULPROG zg30  
 TD 65536  
 SOLVENT CDCl3  
 NS 13  
 DS 2  
 SWH 10000.000 Hz  
 FIDRES 0.152588 Hz  
 AQ 3.2767999 sec  
 RG 30.72  
 DW 50.000 usec  
 DE 6.50 usec  
 TE 294.3 K  
 D1 1.00000000 sec  
 TD0 1

==== CHANNEL f1 =====  
 SFO1 500.1330885 MHz  
 NUC1 1H  
 P1 13.00 usec  
 PLW1 13.00000000 W

F2 - Processing parameters  
 SI 65536  
 SF 500.1300122 MHz  
 WDW EM  
 SSB 0  
 LB 0.30 Hz  
 GB 0  
 PC 1.00

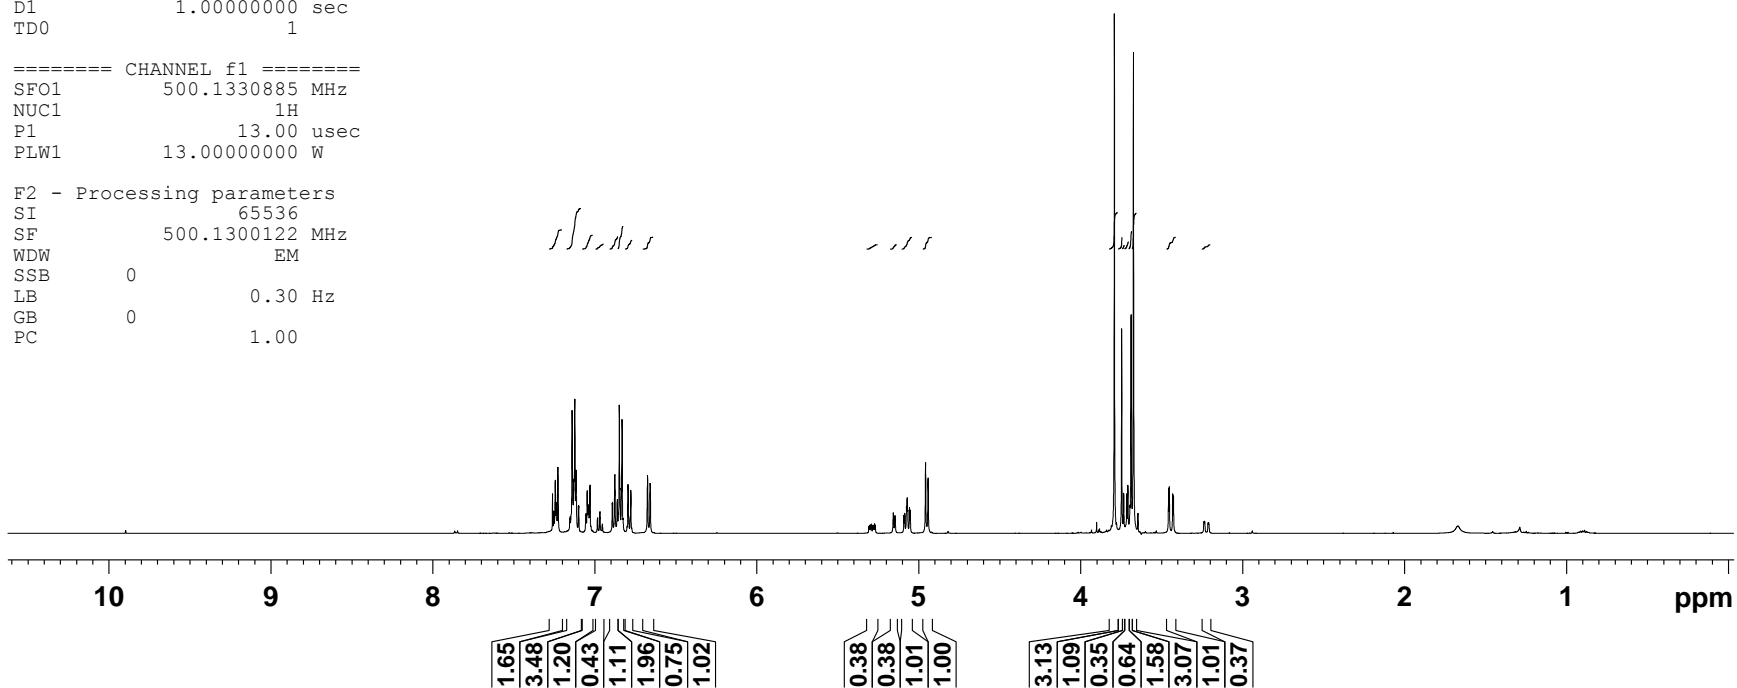

Figure S06. <sup>1</sup>H NMR Spectrum of 3b (major + minor, dr 73:27)

Current Data Parameters  
 NAME INN-CH-67-13C  
 EXPNO 8  
 PROCNO 1

F2 - Acquisition Parameters  
 Date\_ 20140414  
 Time 19.49  
 INSTRUM spect  
 PROBHD 5 mm PABBO BB/  
 PULPROG zgpg30  
 TD 65536  
 SOLVENT CDCl3  
 NS 134  
 DS 4  
 SWH 29761.904 Hz  
 FIDRES 0.454131 Hz  
 AQ 1.1010048 sec  
 RG 197.27  
 DW 16.800 usec  
 DE 6.50 usec  
 TE 294.9 K  
 D1 1.00000000 sec  
 D11 0.03000000 sec  
 TD0 1

==== CHANNEL f1 =====  
 SFO1 125.7703637 MHz  
 NUC1 13C  
 P1 8.90 usec  
 PLW1 103.00000000 W

==== CHANNEL f2 =====  
 SFO2 500.1320005 MHz  
 NUC2 1H  
 CPDPRG[2] waltz16  
 PCPD2 80.00 usec  
 PLW2 13.00000000 W  
 PLW12 0.34327999 W  
 PLW13 0.21969999 W

F2 - Processing parameters  
 SI 32768  
 SF 125.7577774 MHz  
 WDW EM  
 SSB 0  
 LB 1.00 Hz  
 GB 0  
 PC 1.40

159.48  
 159.27  
 138.06  
 137.75  
 131.80  
 130.17  
 129.66  
 129.56  
 127.97  
 127.73  
 127.04  
 126.92  
 121.38  
 121.25  
 119.87  
 119.63  
 118.43  
 117.06  
 114.43  
 114.08  
 108.53  
 108.46  
 107.04  
 106.62  
 89.06  
 85.96  
 77.45  
 77.20  
 76.95  
 55.35  
 55.27  
 43.65  
 41.67  
 30.27  
 30.14  
 29.38  
 22.75

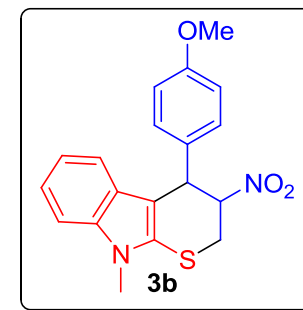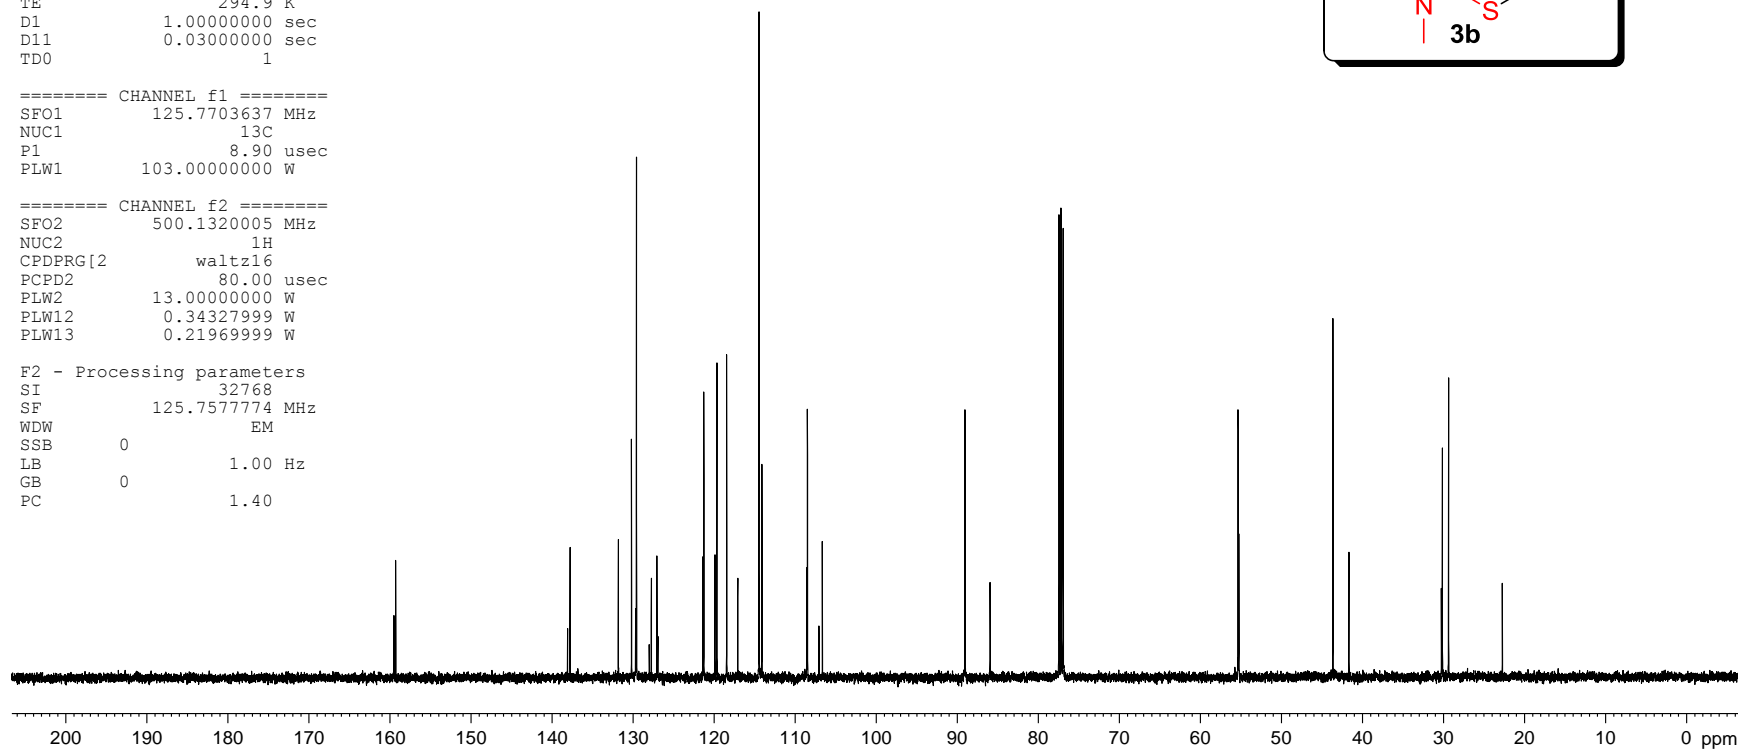

Figure S07.  $^{13}\text{C}$  NMR Spectrum of 3b (major + minor, dr 73:27)

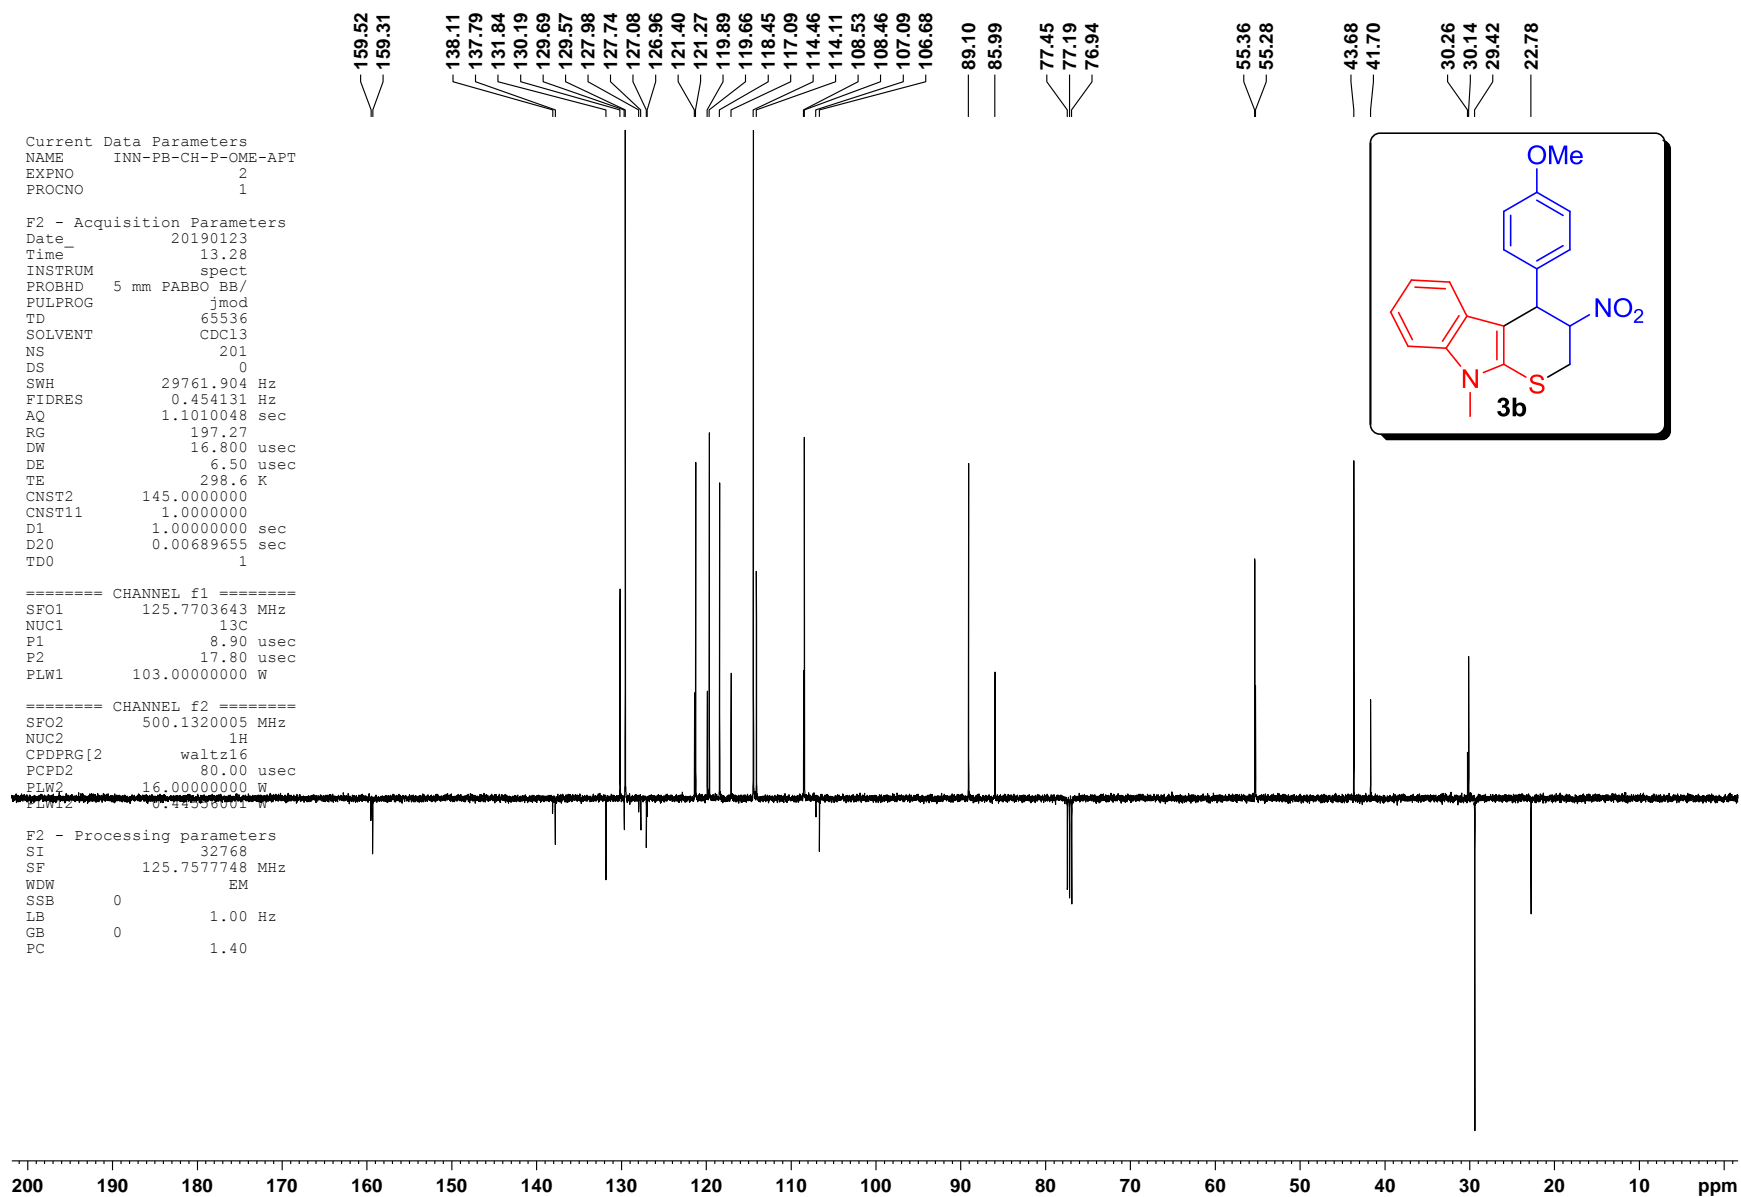Figure S08. <sup>13</sup>C-APT NMR Spectrum of 3b (major + minor, dr 73:27)

Current Data Parameters  
 NAME INN-PB-70-C-1H  
 EXPNO 8  
 PROCNO 1

## F2 - Acquisition Parameters

Date\_ 20150211  
 Time\_ 23.50  
 INSTRUM spect  
 PROBHD 5 mm PABBO BB/  
 PULPROG zg30  
 TD 65536  
 SOLVENT CDC13  
 NS 16  
 DS 2  
 SWH 10000.000 Hz  
 FIDRES 0.152588 Hz  
 AQ 3.2767999 sec  
 RG 30.72  
 DW 50.000 usec  
 DE 6.50 usec  
 TE 295.5 K  
 D1 1.00000000 sec  
 TD0 1

==== CHANNEL f1 =====  
 SFO1 500.1330885 MHz  
 NUC1 1H  
 P1 13.00 usec  
 PLW1 13.00000000 W

F2 - Processing parameters  
 SI 65536  
 SF 500.1300129 MHz  
 WDW EM  
 SSB 0  
 LB 0.30 Hz  
 GB 0  
 PC 1.00

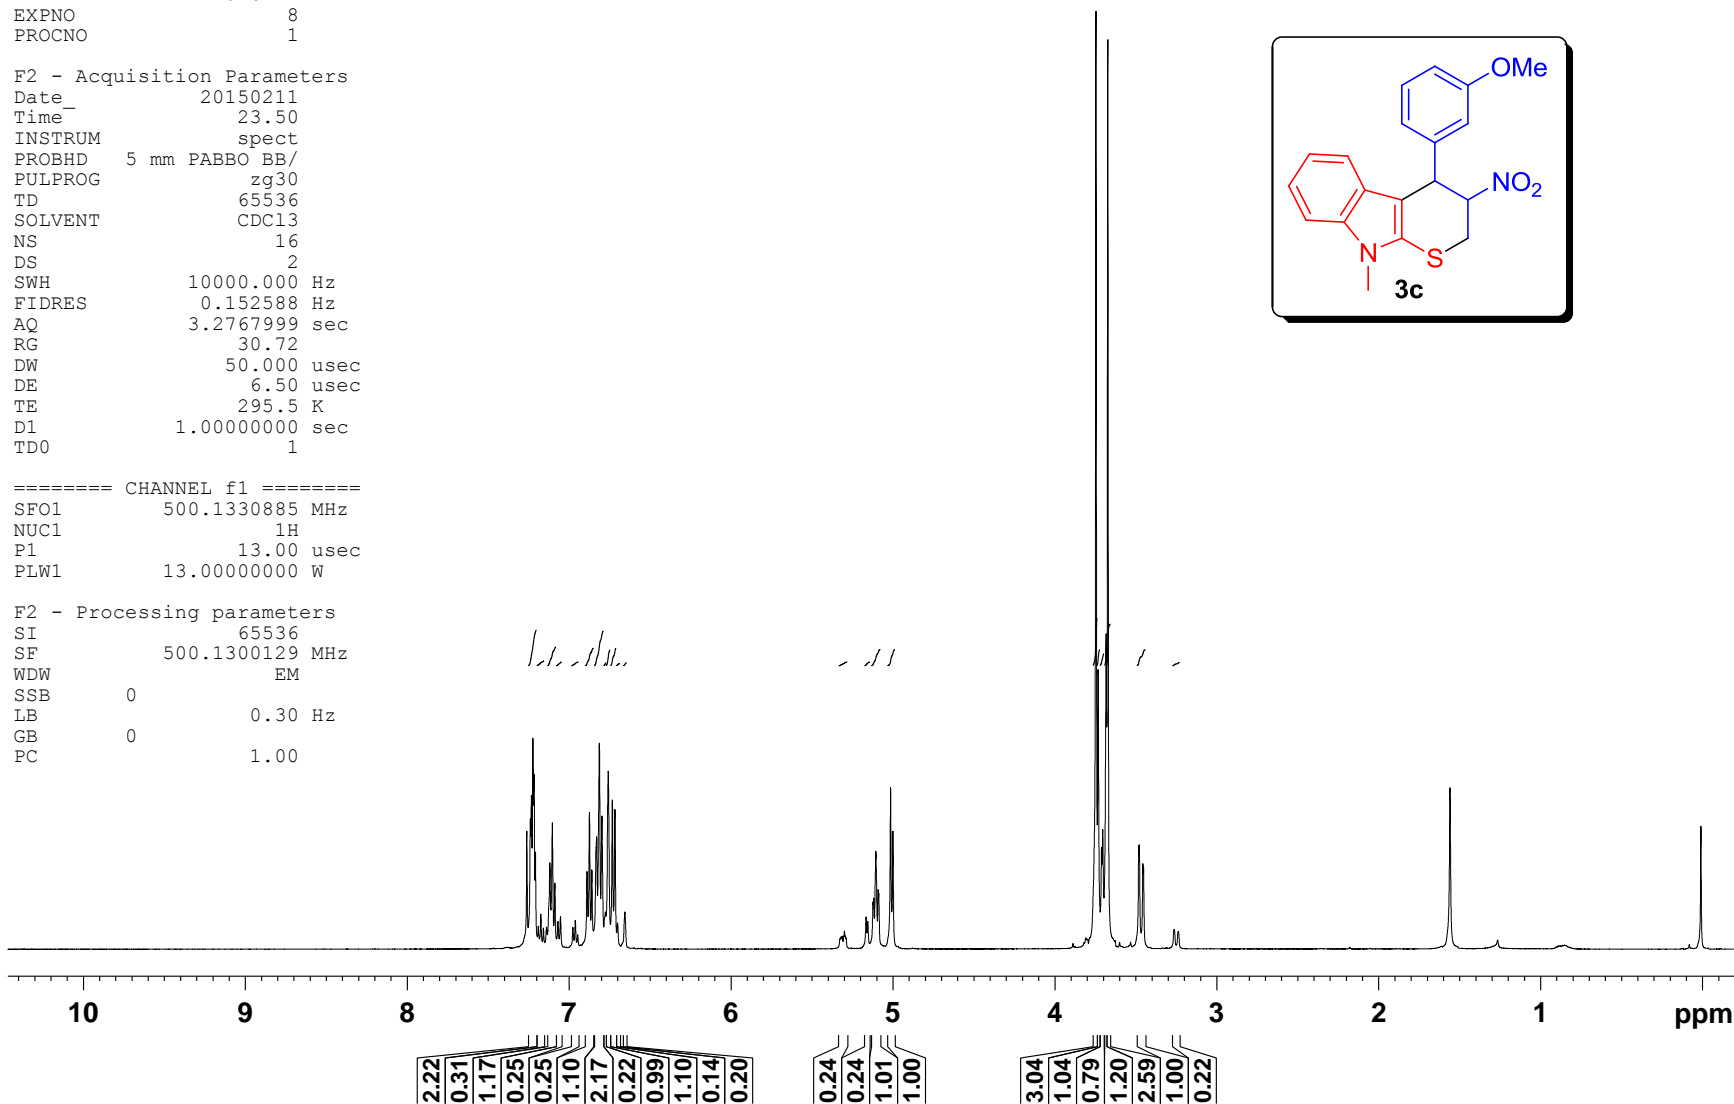

Figure S09. <sup>1</sup>H NMR Spectrum of 3c (major + minor, dr 80:20)

Current Data Parameters  
 NAME INN-PB-70-13C  
 EXPNO 15  
 PROCNO 1

F2 - Acquisition Parameters  
 Date\_ 20140519  
 Time 22.28  
 INSTRUM spect  
 PROBHD 5 mm PABBO BB/  
 PULPROG zgpg30  
 TD 65536  
 SOLVENT CDC13  
 NS 159  
 DS 4  
 SWH 29761.904 Hz  
 FIDRES 0.454131 Hz  
 AQ 1.1010048 sec  
 RG 197.27  
 DW 16.800 usec  
 DE 6.50 usec  
 TE 297.0 K  
 D1 1.00000000 sec  
 D11 0.03000000 sec  
 TD0 1

===== CHANNEL f1 =====  
 SFO1 125.7703637 MHz  
 NUC1 13C  
 P1 8.90 usec  
 PLW1 103.00000000 W

===== CHANNEL f2 =====  
 SFO2 500.1320005 MHz  
 NUC2 1H  
 CPDPRG[2] waltz16  
 PCPD2 80.00 usec  
 PLW2 13.00000000 W  
 PLW12 0.34327999 W  
 PLW13 0.21969999 W

F2 - Processing parameters  
 SI 32768  
 SF 125.7577748 MHz  
 WDW EM  
 SSB 0  
 LB 1.00 Hz  
 GB 0  
 PC 1.40

160.11  
159.73  
141.76  
139.37  
138.10  
137.76  
130.14  
129.67  
128.07  
127.83  
127.10  
126.98  
121.59  
121.40  
121.30  
120.87  
119.90  
119.69  
118.26  
117.00  
115.61  
114.64  
113.01  
112.98  
108.55  
108.46  
106.69  
106.15  
88.47  
85.76  
77.45  
77.20  
76.94

55.37  
55.29

44.05  
42.37

30.28  
30.14  
29.25

22.84

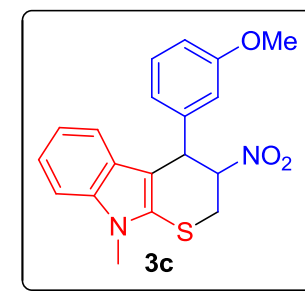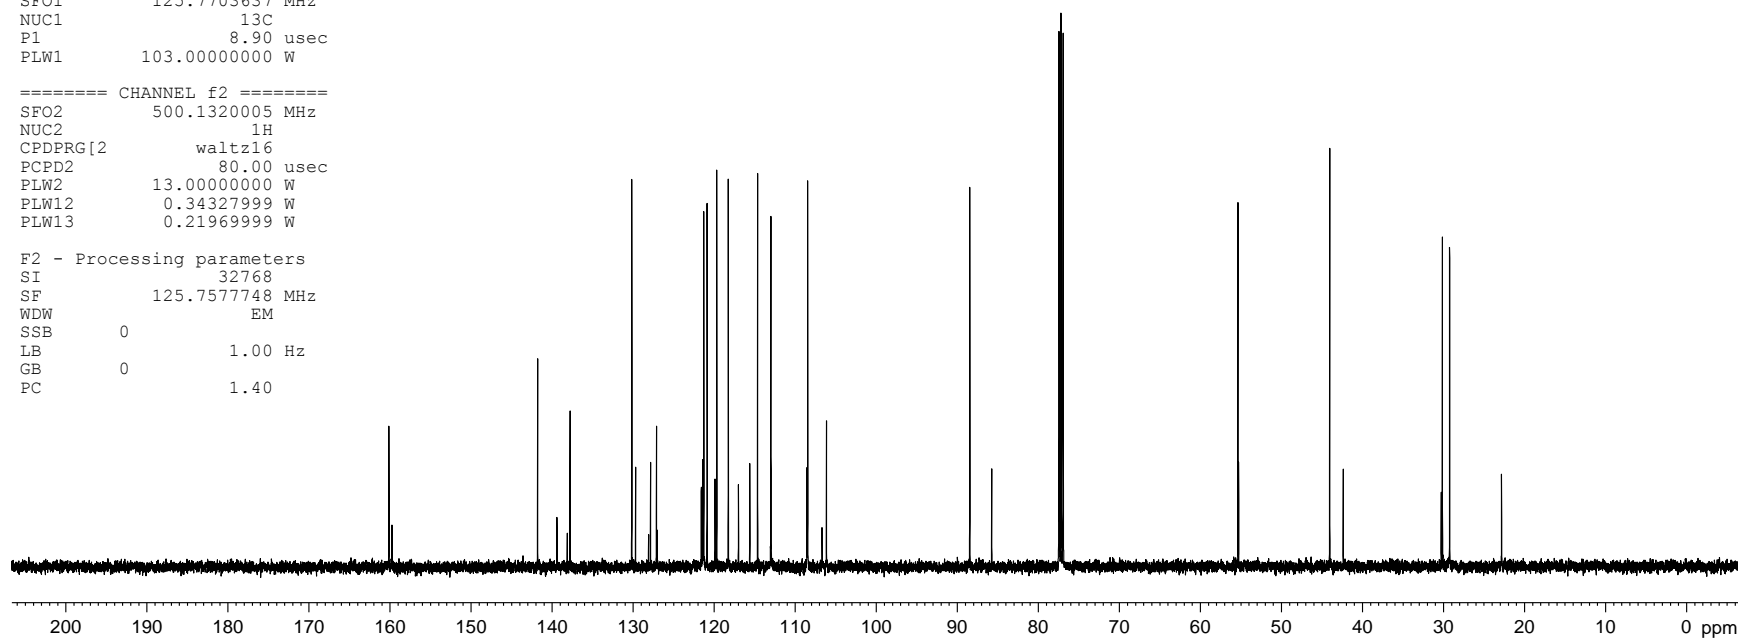

Figure S10. <sup>13</sup>C NMR Spectrum of 3c (major + minor, dr 80:20)

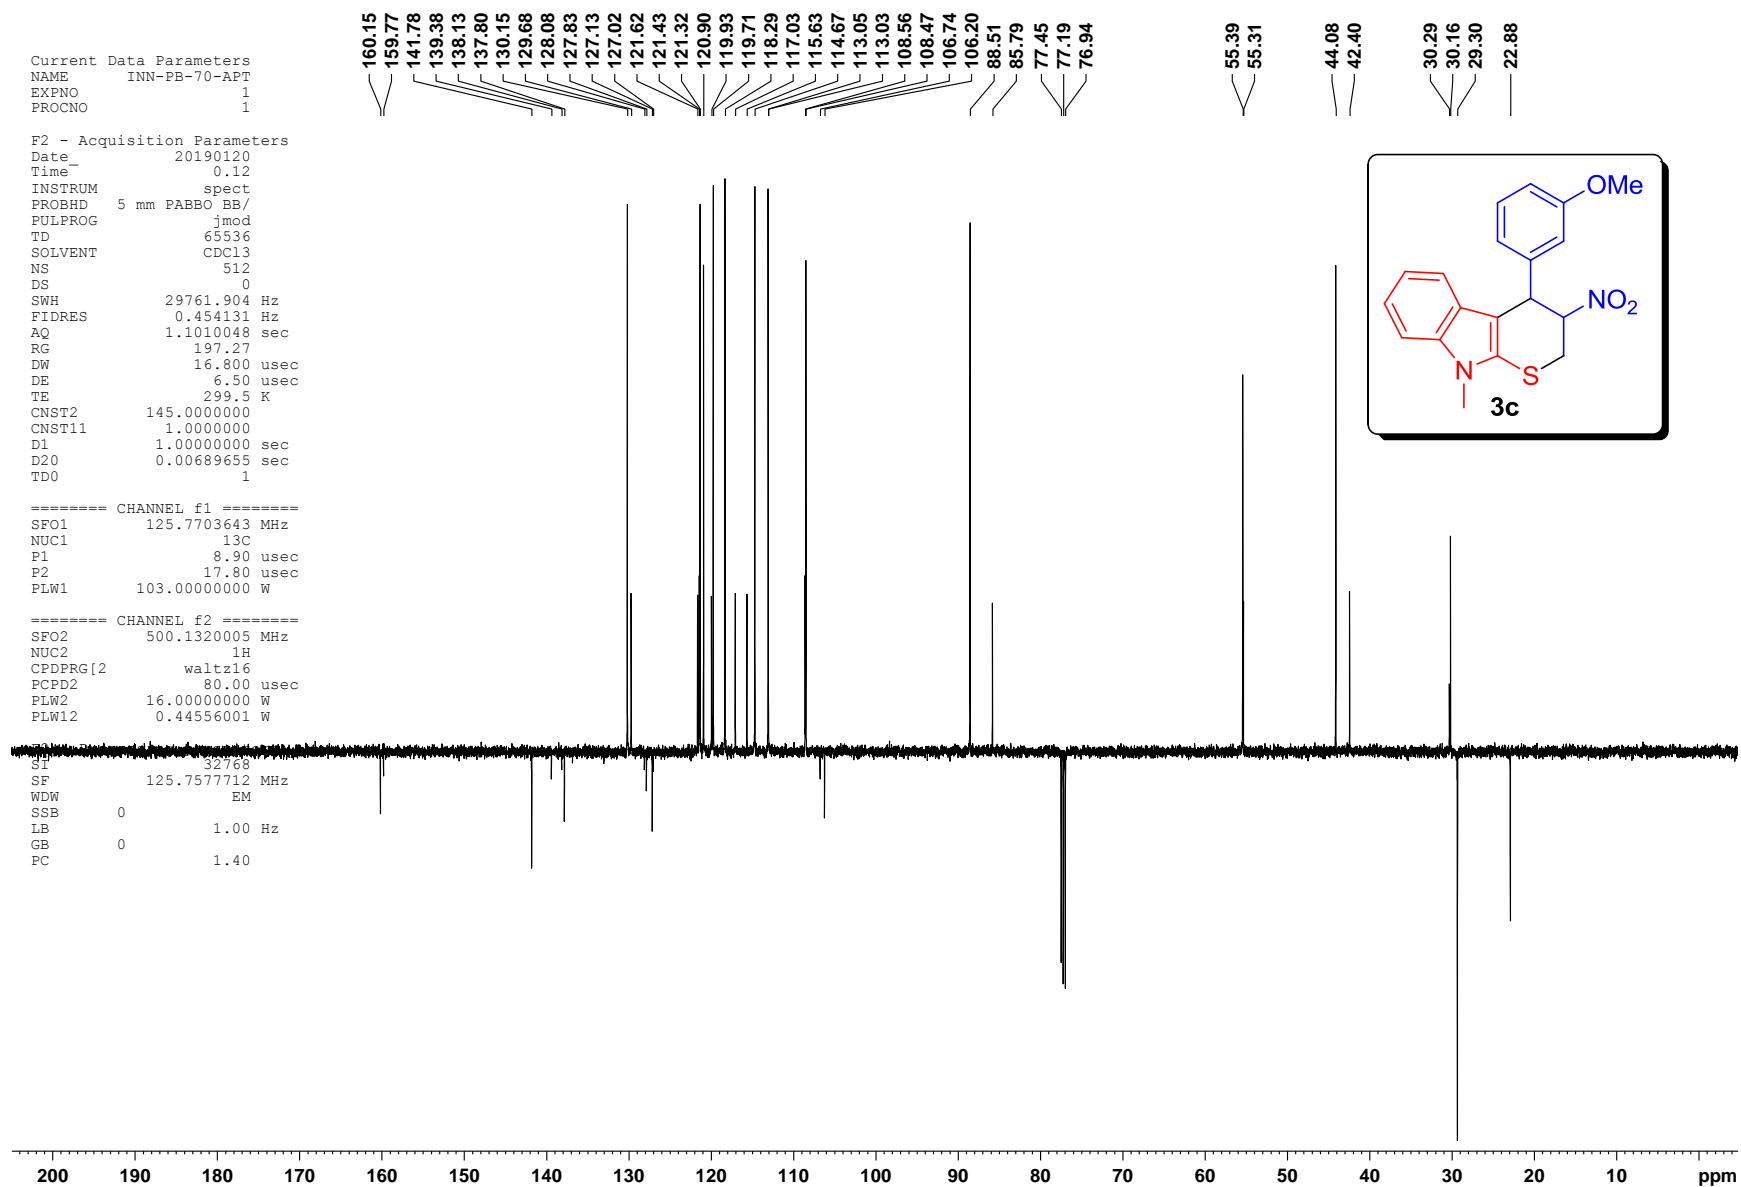

Current Data Parameters  
 NAME INN-PB-69-1H  
 EXPNO 1  
 PROCNO 1

## F2 - Acquisition Parameters

Date\_ 20170217  
 Time\_ 17.47  
 INSTRUM spect  
 PROBHD 5 mm PABBO BB-  
 PULPROG zg30  
 TD 54274  
 SOLVENT CDC13  
 NS 5  
 DS 0  
 SWH 8223.685 Hz  
 FIDRES 0.151522 Hz  
 AQ 3.2998593 sec  
 RG 181  
 DW 60.800 usec  
 DE 6.50 usec  
 TE 298.0 K  
 D1 1.00000000 sec  
 TD0 1

==== CHANNEL f1 =====  
 NUC1 1H  
 P1 14.75 usec  
 PL1 -1.00 dB  
 PL1W 10.56200695 W  
 SFO1 400.1324710 MHz

F2 - Processing parameters  
 SI 32768  
 SF 400.1300100 MHz  
 WDW EM  
 SSB 0  
 LB 0.30 Hz  
 GB 0  
 PC 1.00

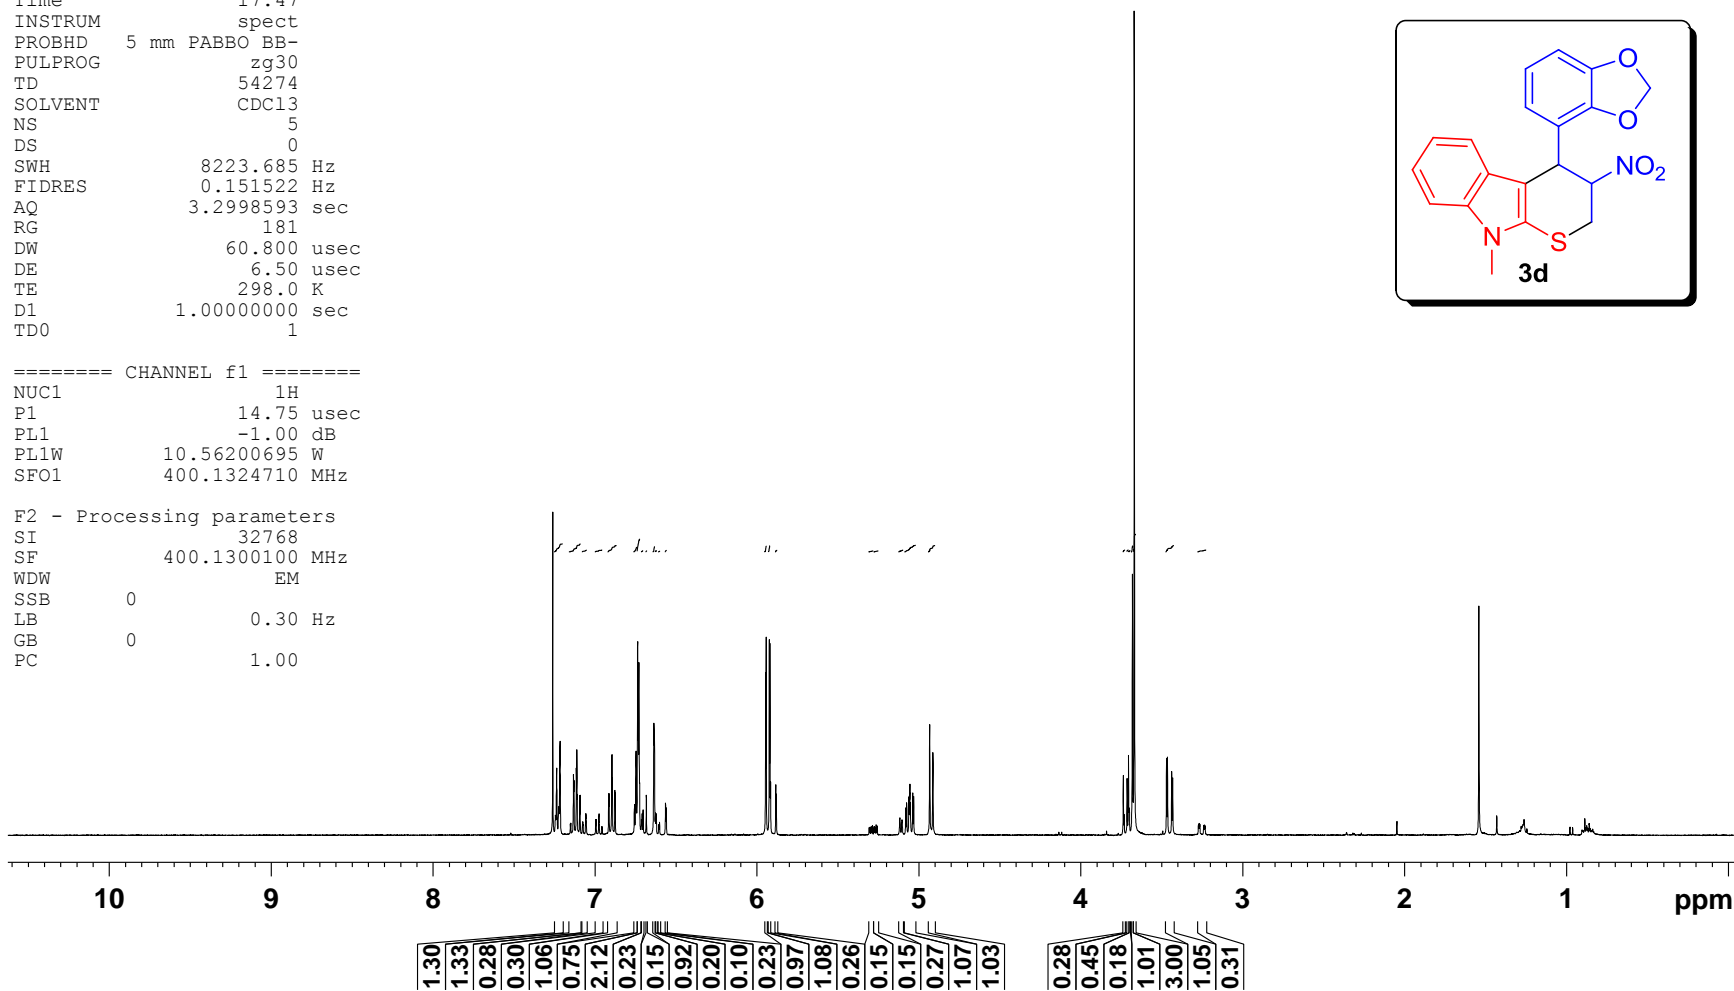

Figure S12. <sup>1</sup>H NMR Spectrum of 3d (major + minor, dr 78:22)

Current Data Parameters  
 NAME INN-PB-TI-PIP-13C  
 EXPNO 3  
 PROCNO 1

F2 - Acquisition Parameters  
 Date\_ 20190130  
 Time\_ 13.28  
 INSTRUM spect  
 PROBHD 5 mm PABBO BB/  
 PULPROG zgpg30  
 TD 65536  
 SOLVENT CDC13  
 NS 197  
 DS 0  
 SWH 29761.904 Hz  
 FIDRES 0.454131 Hz  
 AQ 1.1010048 sec  
 RG 197.27  
 DW 16.800 usec  
 DE 6.50 usec  
 TE 298.3 K  
 D1 1.00000000 sec  
 D11 0.03000000 sec  
 TD0 1

===== CHANNEL f1 =====  
 SFO1 125.7703637 MHz  
 NUC1 13C  
 P1 8.90 usec  
 PLW1 103.0000000 W

===== CHANNEL f2 =====  
 SFO2 500.1320005 MHz  
 NUC2 1H  
 CPDPRG[2] waltz16  
 PCPD2 80.00 usec  
 PLW2 16.00000000 W  
 PLW12 0.44556001 W  
 PLW13 0.22411001 W

F2 - Processing parameters  
 SI 32768  
 SF 125.7577750 MHz  
 WDW EM  
 SSB 0  
 LB 1.00 Hz  
 GB 0  
 PC 1.40

148.32  
 147.99  
 147.63  
 147.43  
 138.10  
 137.79  
 133.75  
 131.54  
 128.01  
 127.83  
 127.02  
 126.92  
 122.63  
 122.07  
 121.46  
 121.34  
 119.93  
 119.74  
 118.40  
 117.02  
 109.48  
 108.63  
 108.58  
 108.52  
 108.50  
 108.43  
 106.92  
 106.51  
 101.33  
 101.30  
 89.10  
 85.90  
 77.45  
 77.19  
 76.94

44.18  
 42.10

30.27  
 30.15  
 29.47  
 22.74

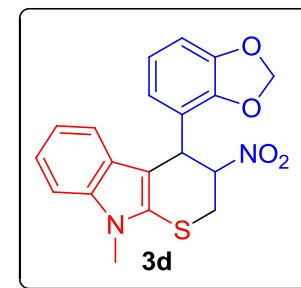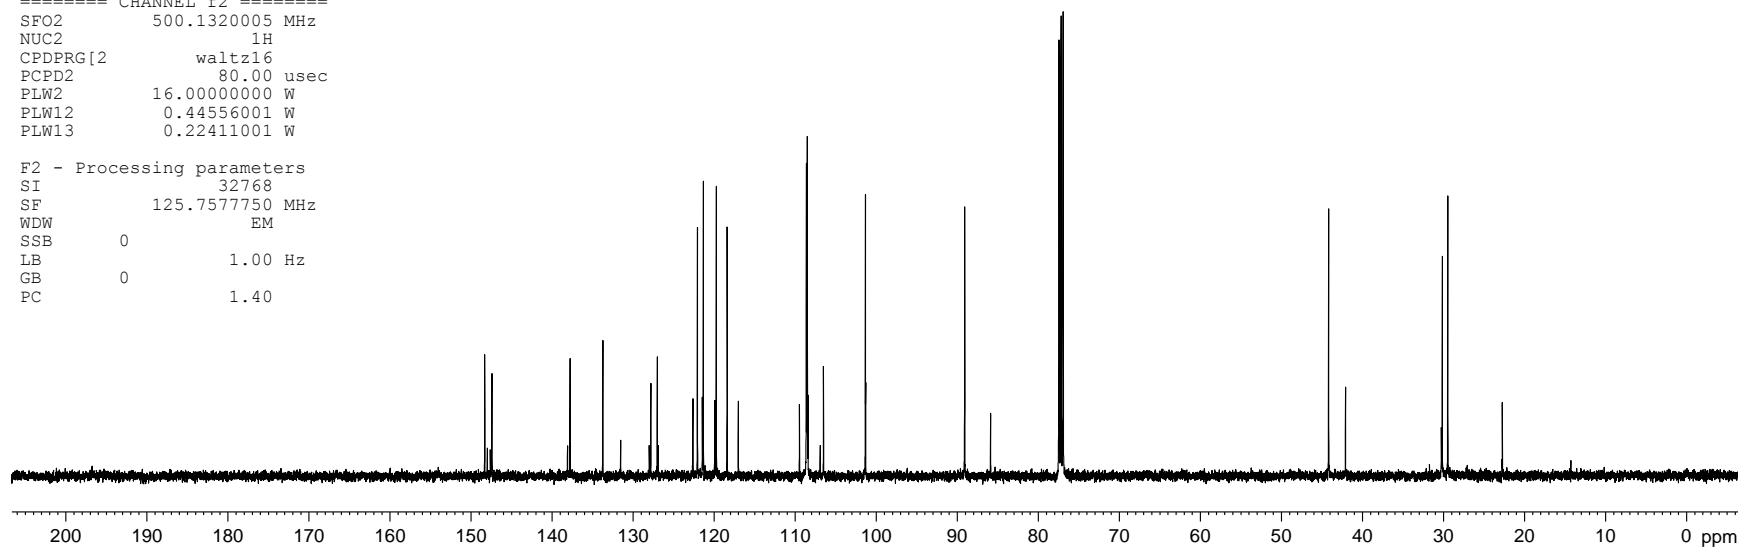

Figure S13.  $^{13}\text{C}$  NMR Spectrum of 3d (major + minor, dr 78:22)



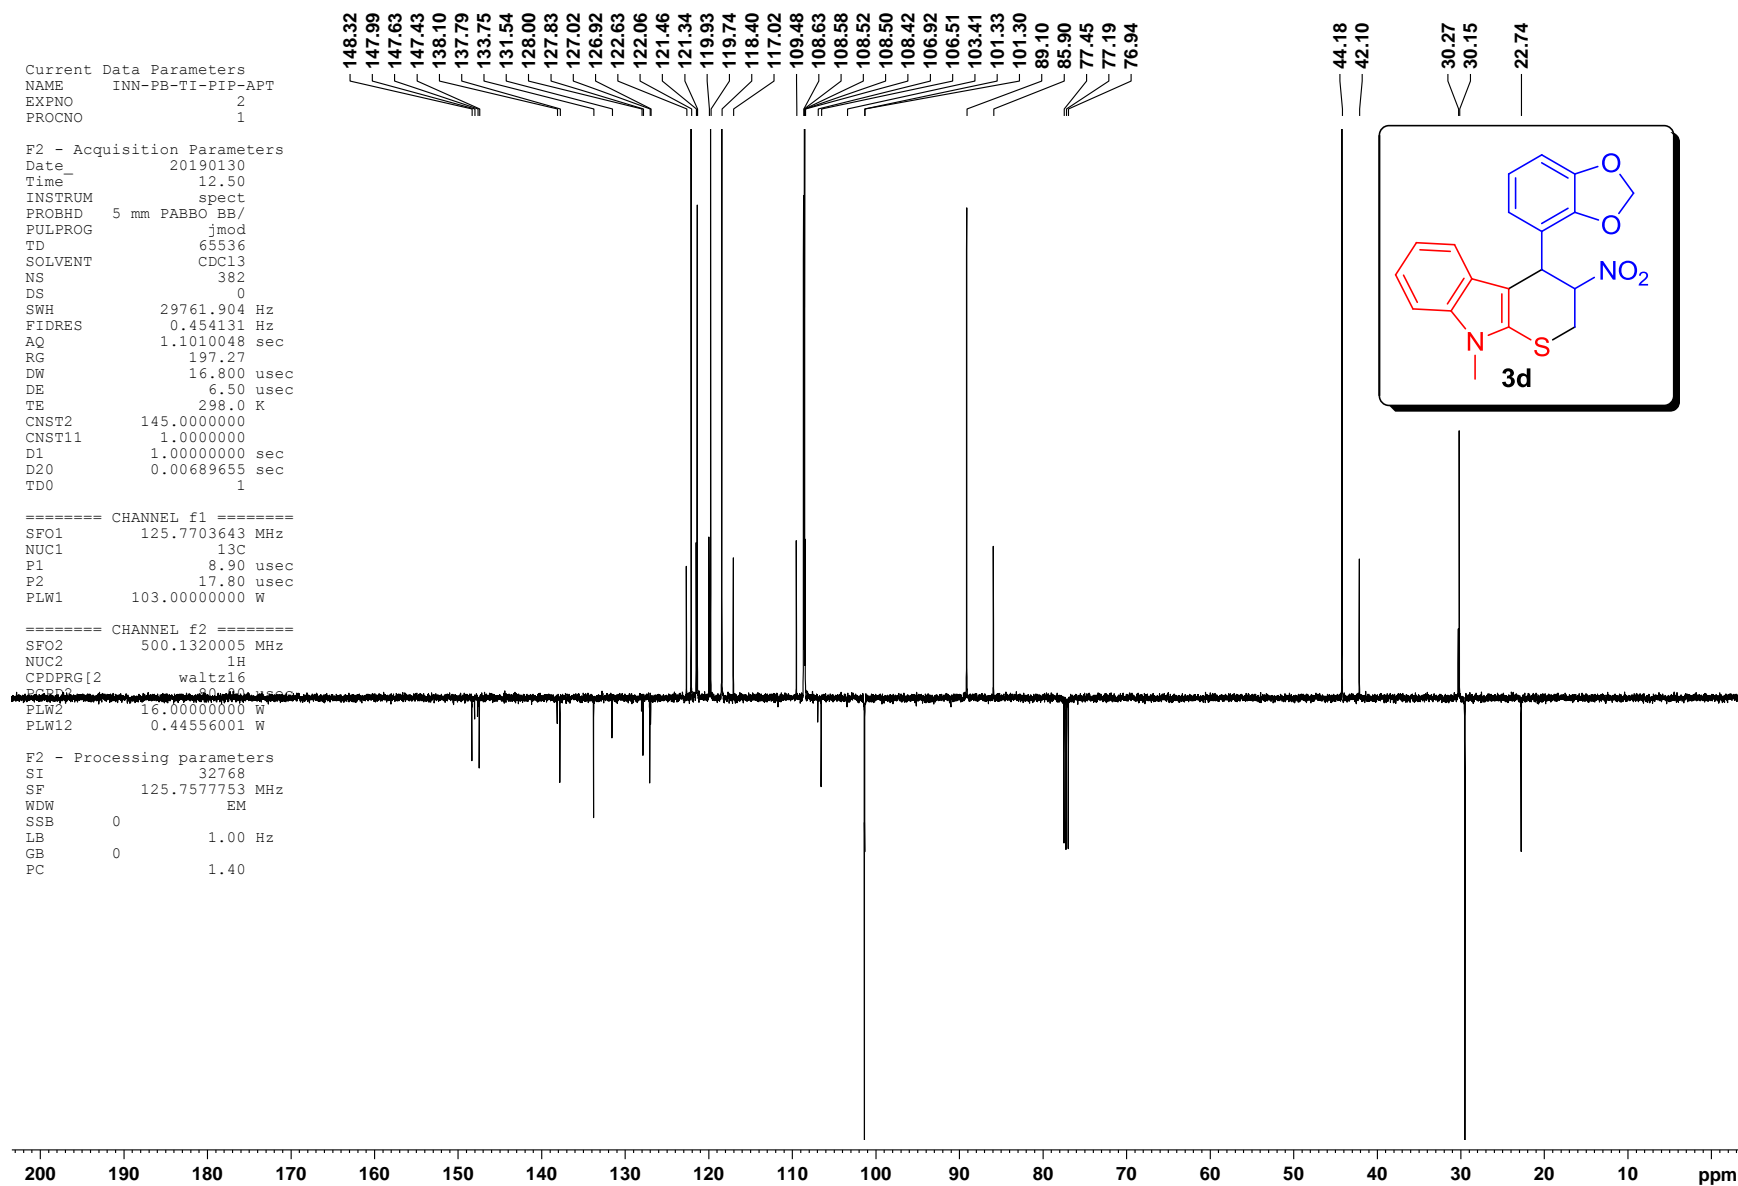

Current Data Parameters  
 NAME INN-PB-65-1H  
 EXPNO 1  
 PROCNO 1

F2 - Acquisition Parameters  
 Date\_ 20170212  
 Time\_ 1.41  
 INSTRUM spect  
 PROBHD 5 mm PABBO BB/  
 PULPROG zg30  
 TD 65536  
 SOLVENT CDC13  
 NS 7  
 DS 2  
 SWH 10000.000 Hz  
 FIDRES 0.152588 Hz  
 AQ 3.2767999 sec  
 RG 80.35  
 DW 50.000 usec  
 DE 6.50 usec  
 TE 295.6 K  
 D1 1.00000000 sec  
 TD0 1

==== CHANNEL f1 =====  
 SFO1 500.1330885 MHz  
 NUC1 1H  
 P1 13.00 usec  
 PLW1 13.00000000 W

F2 - Processing parameters  
 SI 65536  
 SF 500.1300136 MHz  
 WDW EM  
 SSB 0  
 LB 0.30 Hz  
 GB 0  
 PC 1.00

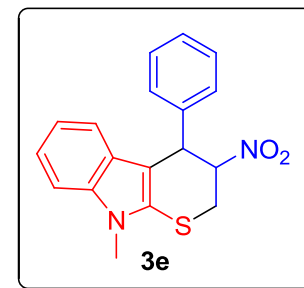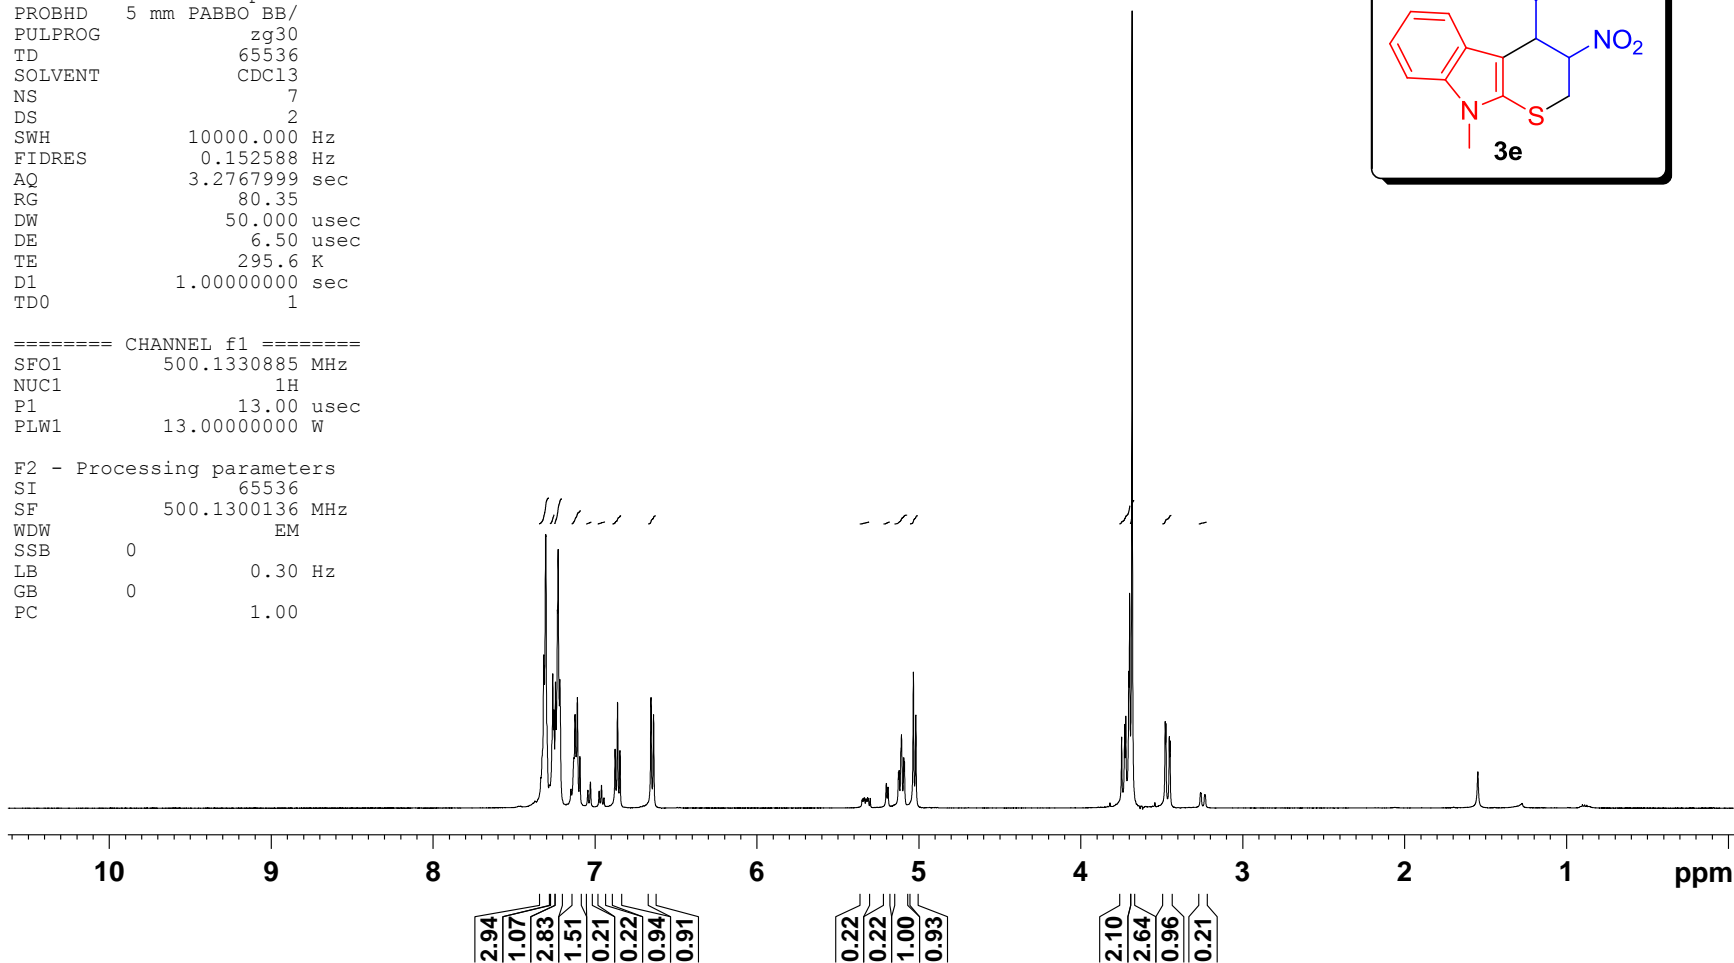

Figure S15. <sup>1</sup>H NMR Spectrum of 3e (major + minor, dr 82:18)

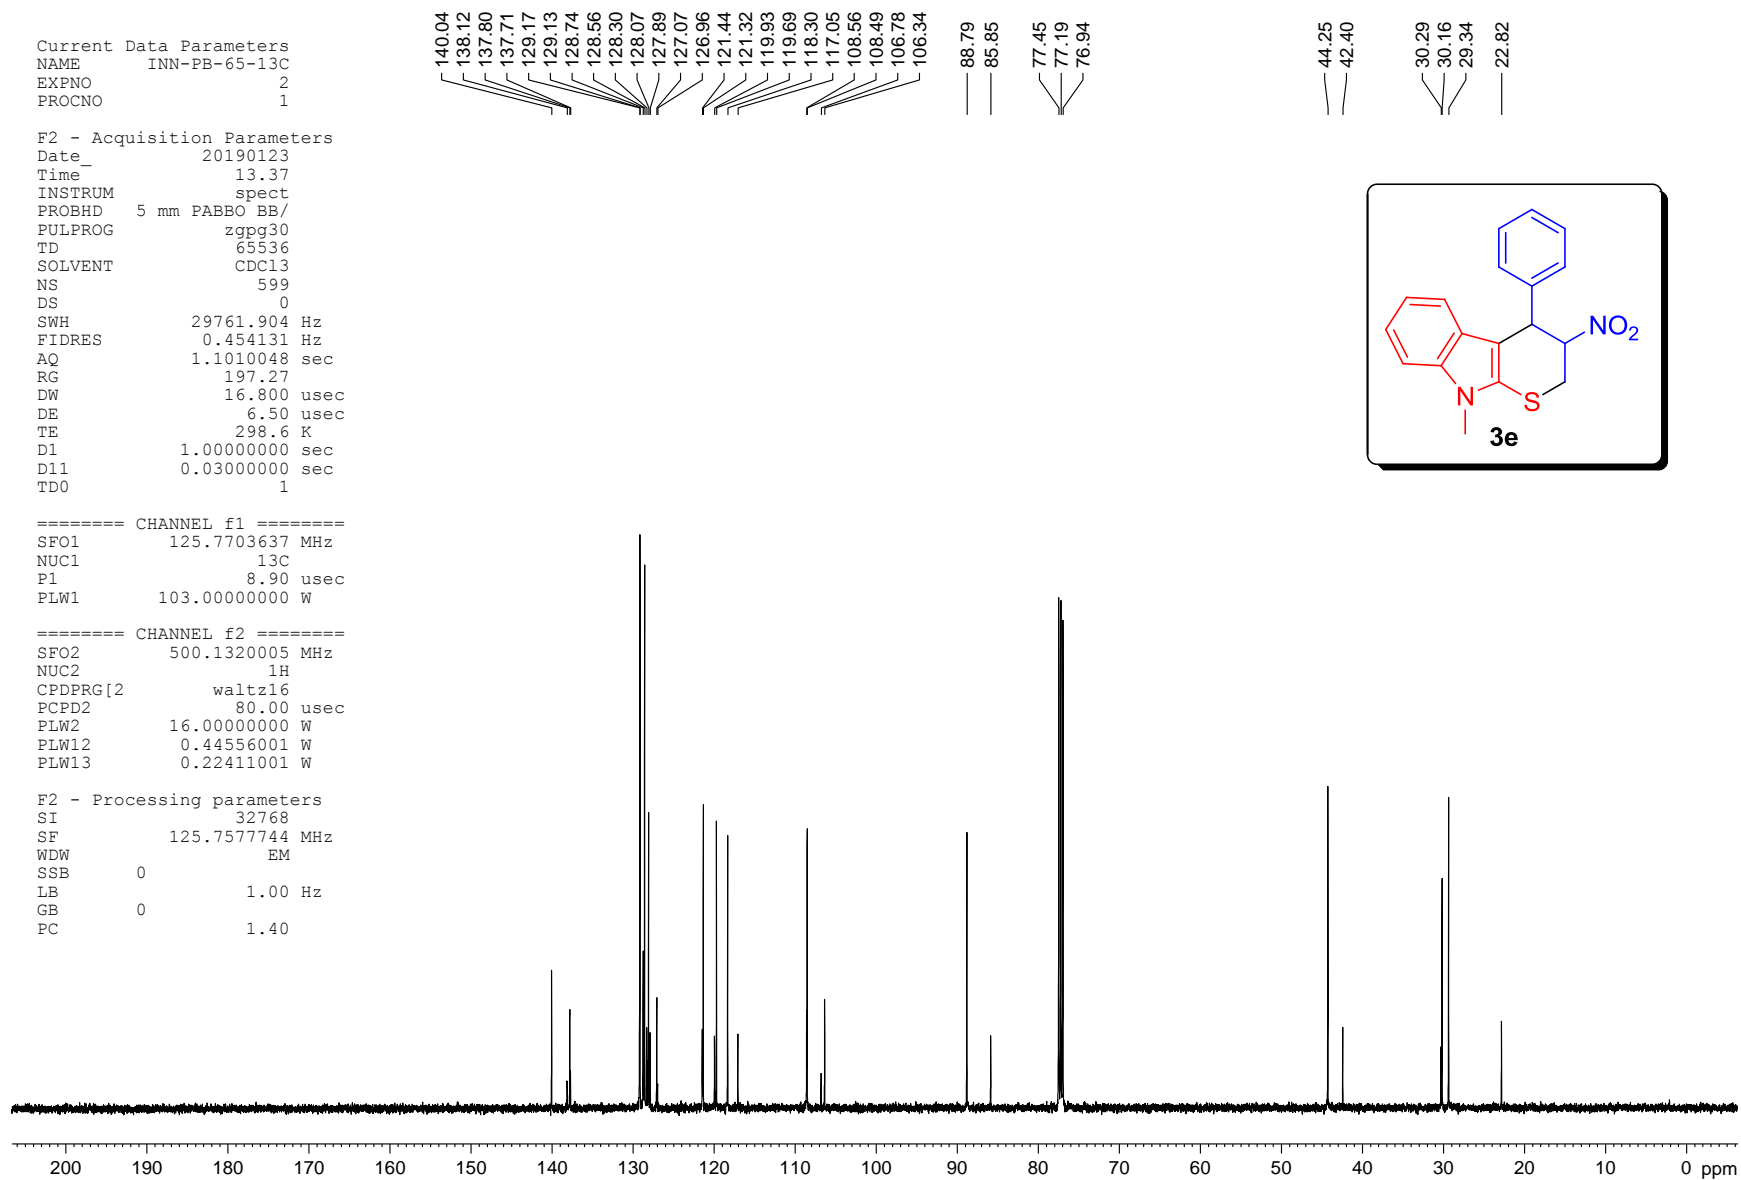Figure S16. <sup>13</sup>C NMR Spectrum of 3e (major + minor, dr 82:18)

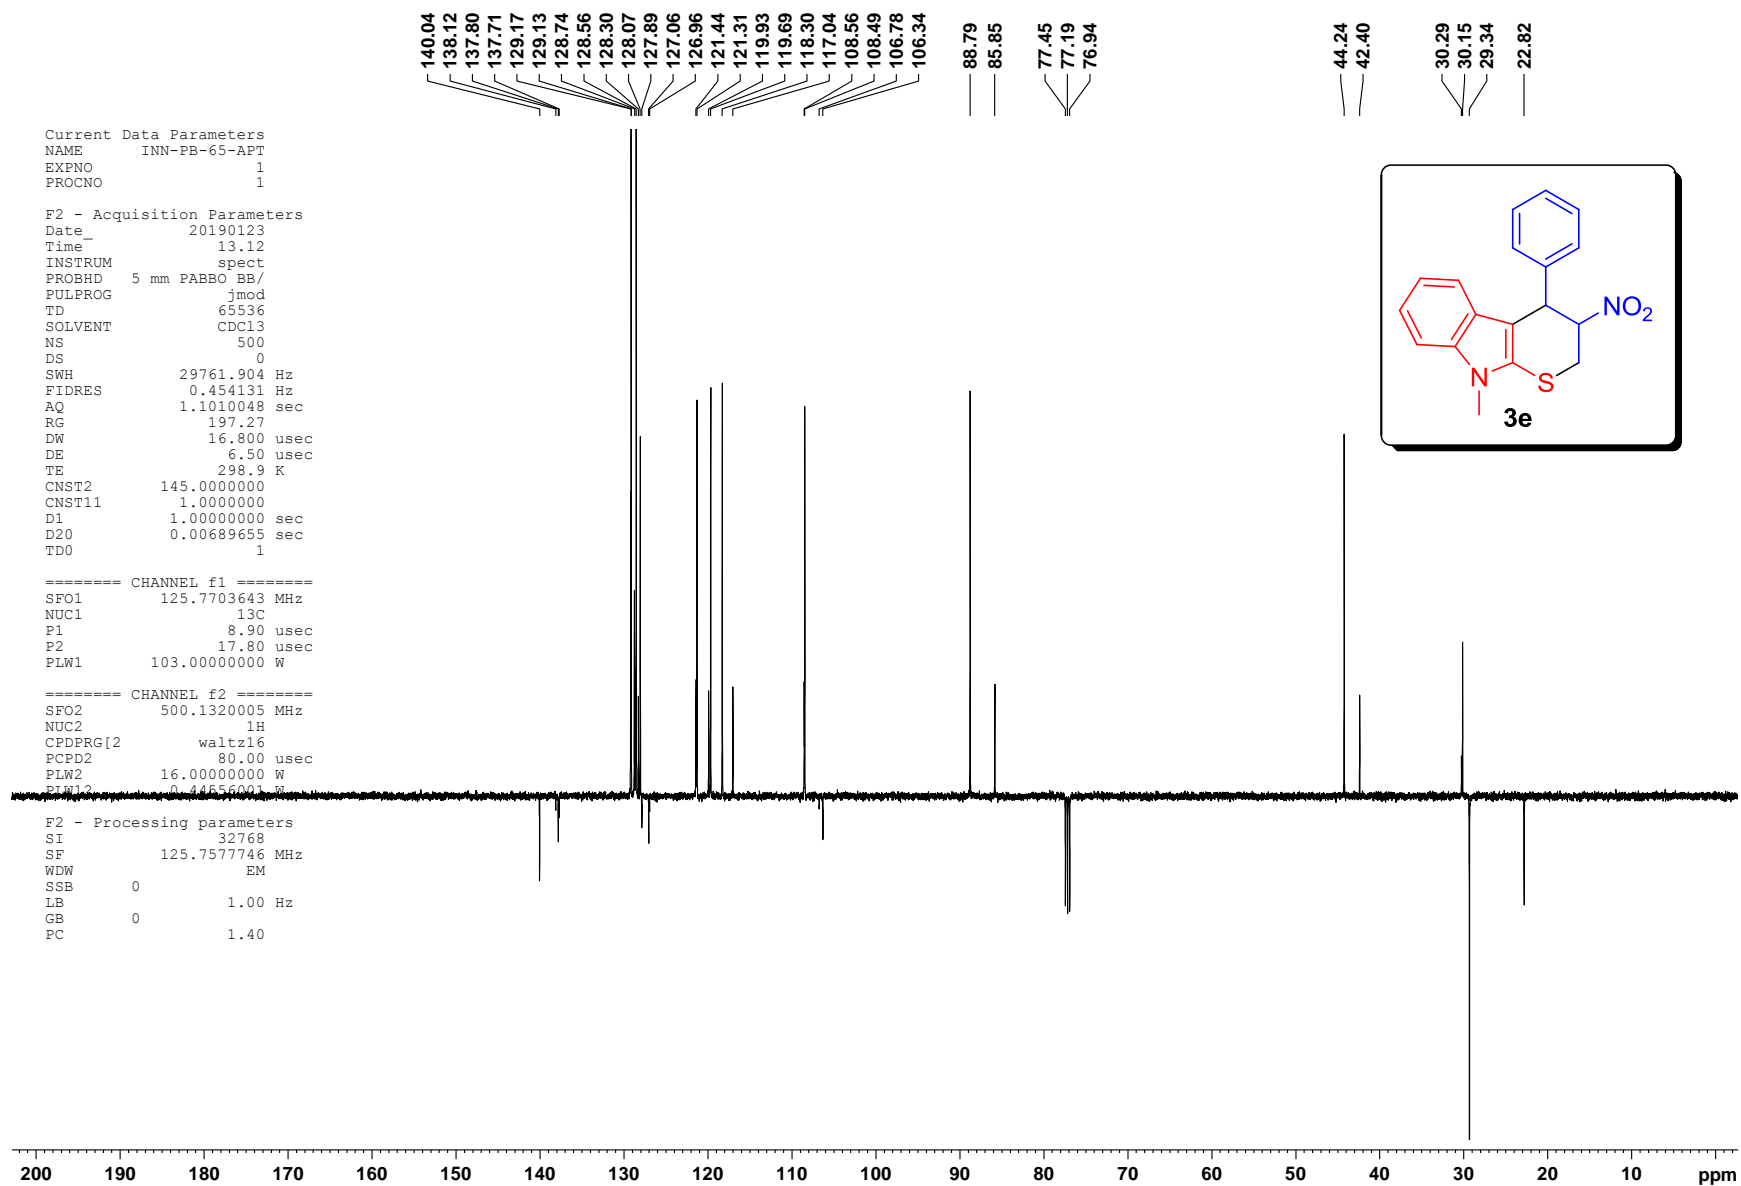

Current Data Parameters  
 NAME INN-PB-72-1H  
 EXPNO 3  
 PROCNO 1

F2 - Acquisition Parameters  
 Date\_ 20140708  
 Time\_ 23.47  
 INSTRUM spect  
 PROBHD 5 mm PABBO BB/  
 PULPROG zg30  
 TD 65536  
 SOLVENT CDCl3  
 NS 16  
 DS 2  
 SWH 10000.000 Hz  
 FIDRES 0.152588 Hz  
 AQ 3.2767999 sec  
 RG 30.72  
 DW 50.000 usec  
 DE 6.50 usec  
 TE 296.8 K  
 D1 1.00000000 sec  
 TD0 1

==== CHANNEL f1 =====  
 SFO1 500.1330885 MHz  
 NUC1 1H  
 P1 13.00 usec  
 PLW1 13.00000000 W

F2 - Processing parameters  
 SI 65536  
 SF 500.1300118 MHz  
 WDW EM  
 SSB 0  
 LB 0.30 Hz  
 GB 0  
 PC 1.00

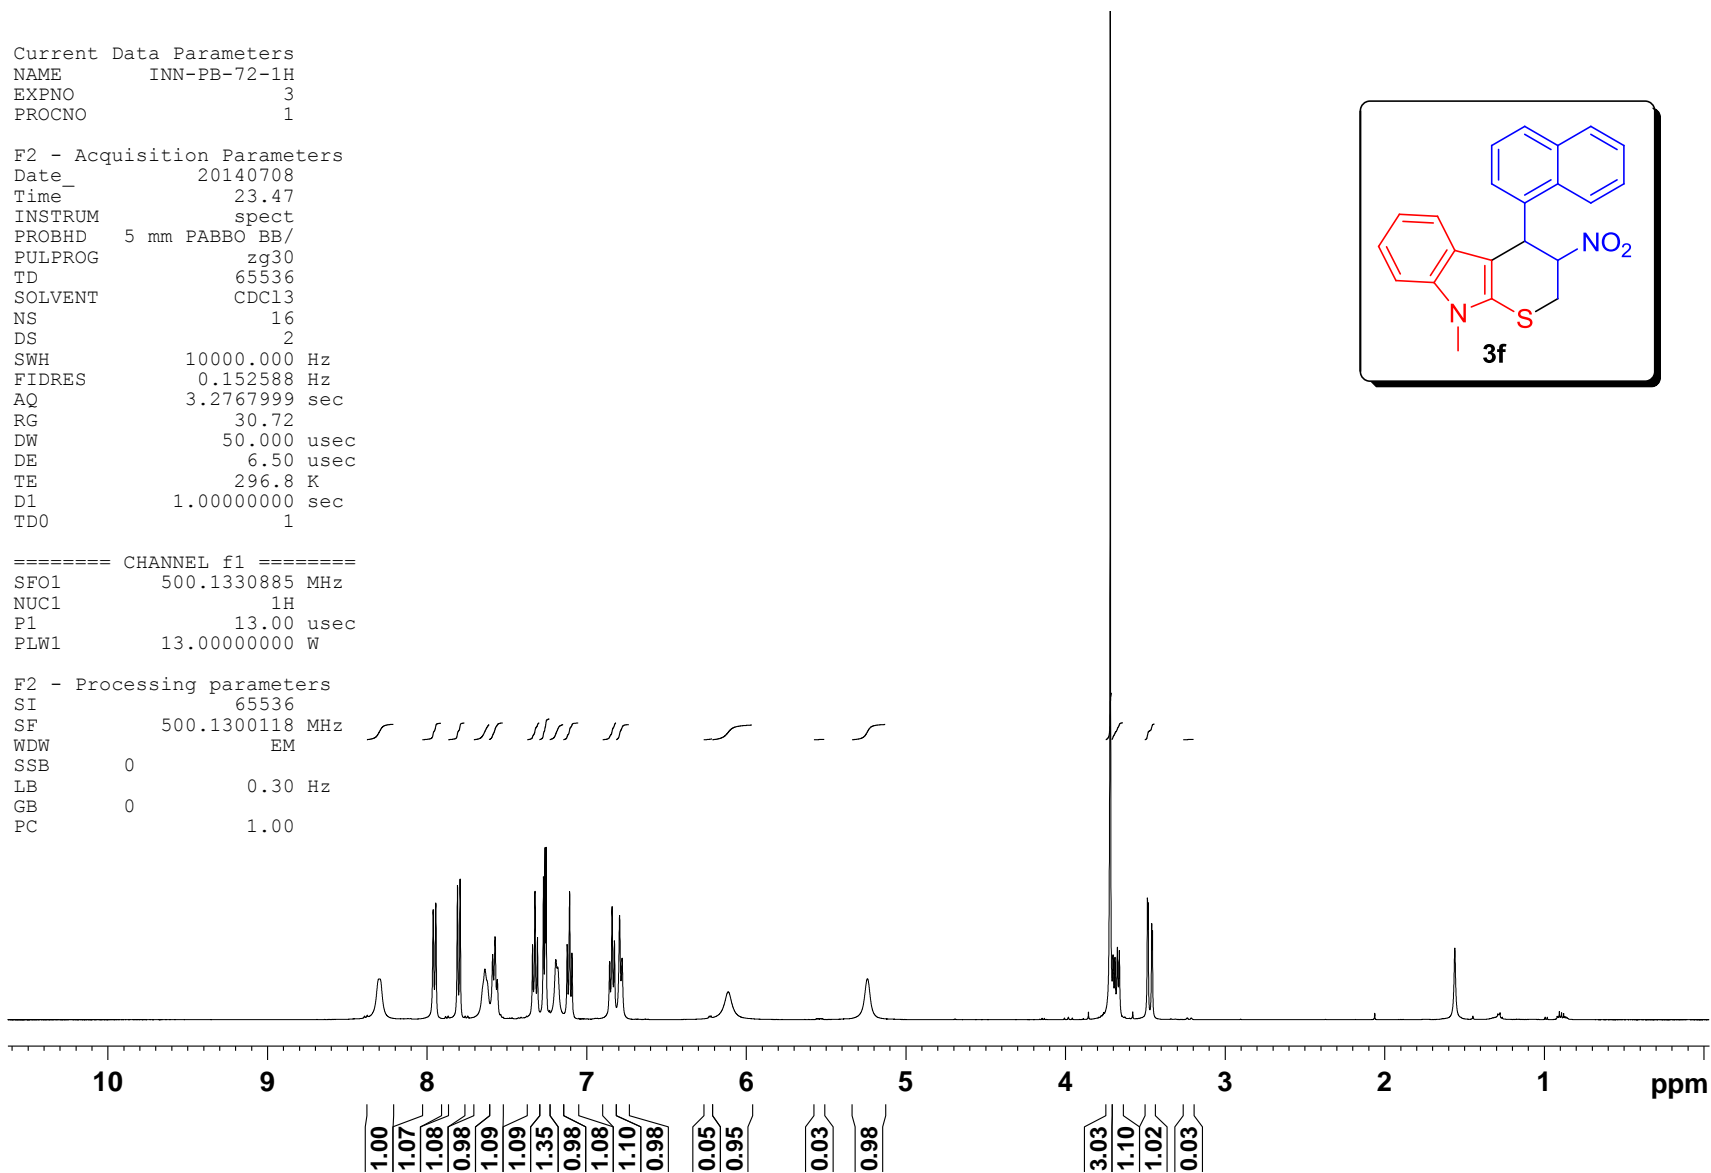

Figure S18.  $^1\text{H}$  NMR Spectrum of 3f (major + minor, dr >95:05)

Current Data Parameters  
 NAME INN-PB-72-13C  
 EXPNO 4  
 PROCNO 1

F2 - Acquisition Parameters  
 Date\_ 20140709  
 Time\_ 9.48  
 INSTRUM spect  
 PROBHD 5 mm PABBO BB/  
 PULPROG zgpg30  
 TD 65536  
 SOLVENT CDC13  
 NS 16340  
 DS 4  
 SWH 29761.904 Hz  
 FIDRES 0.454131 Hz  
 AQ 1.1010048 sec  
 RG 197.27  
 DW 16.800 usec  
 DE 6.50 usec  
 TE 298.3 K  
 D1 1.00000000 sec  
 D11 0.03000000 sec  
 TD0 1

==== CHANNEL f1 =====  
 SFO1 125.7703637 MHz  
 NUC1 13C  
 P1 8.90 usec  
 PLW1 103.00000000 W

==== CHANNEL f2 =====  
 SFO2 500.1320005 MHz  
 NUC2 1H  
 CPDPRG[2] waltz16  
 PCPD2 80.00 usec  
 PLW2 13.00000000 W  
 PLW12 0.34327999 W  
 PLW13 0.21969999 W

F2 - Processing parameters  
 SI 32768  
 SF 125.7577710 MHz  
 WDW EM  
 SSB 0  
 LB 1.00 Hz  
 GB 0  
 PC 1.40

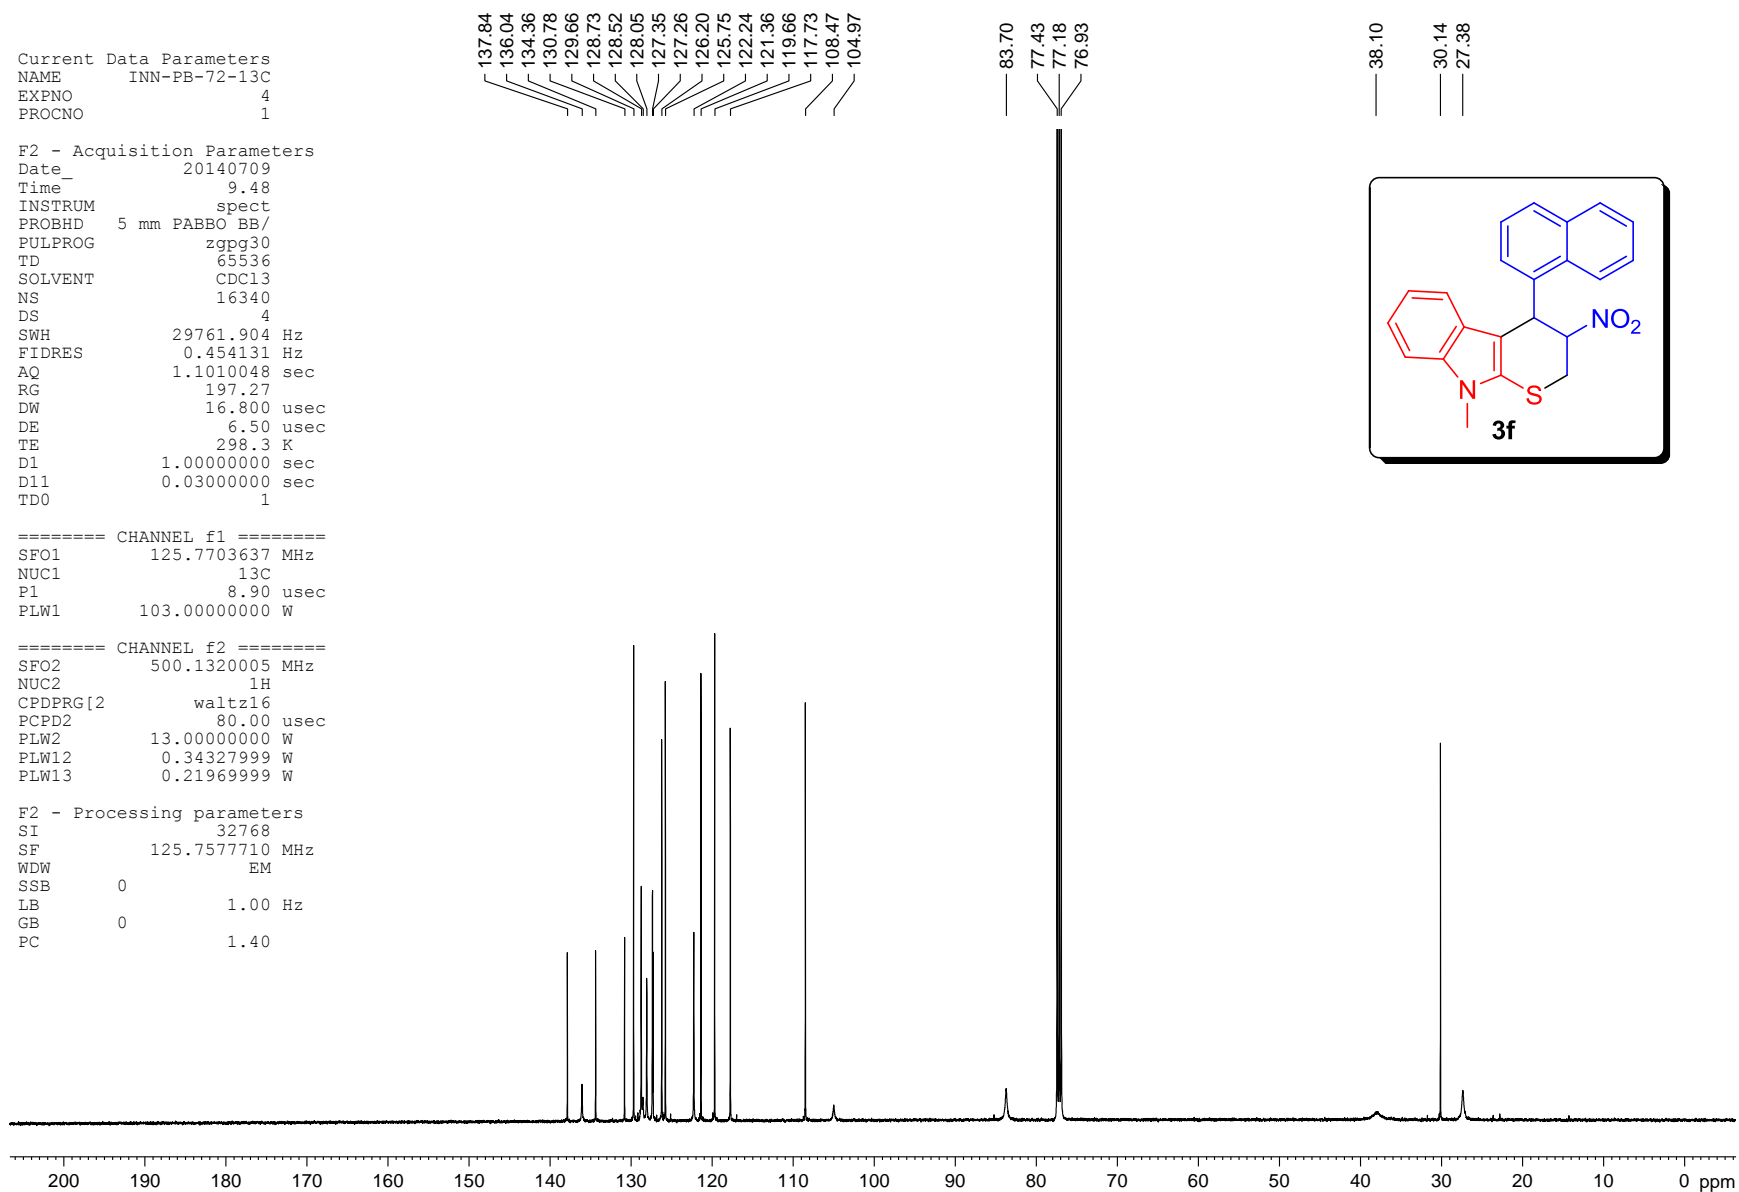

Figure S19. <sup>13</sup>C NMR Spectrum of 3f (major + minor, dr >95:05)

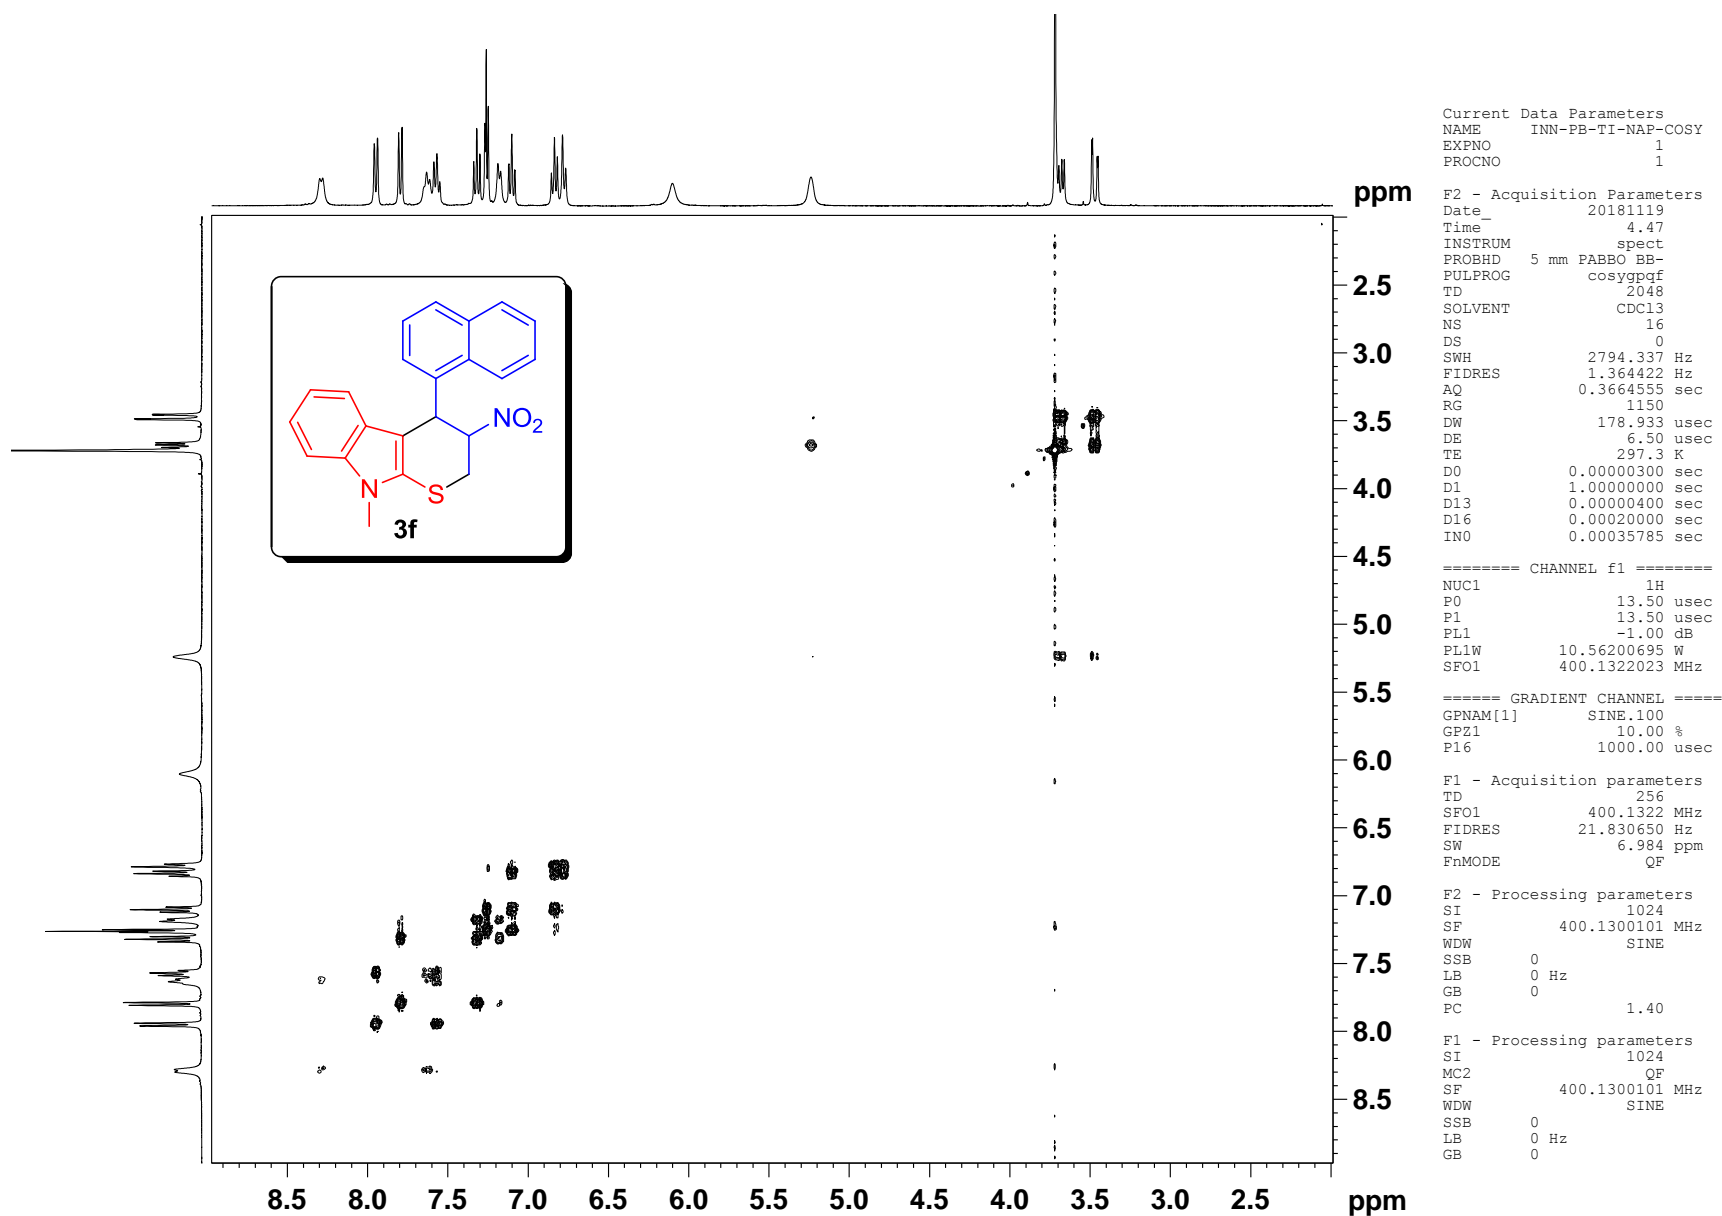Figure S20.  $^1\text{H}$ - $^1\text{H}$  COSY NMR Spectrum of 3f (major + minor, dr >95:05)

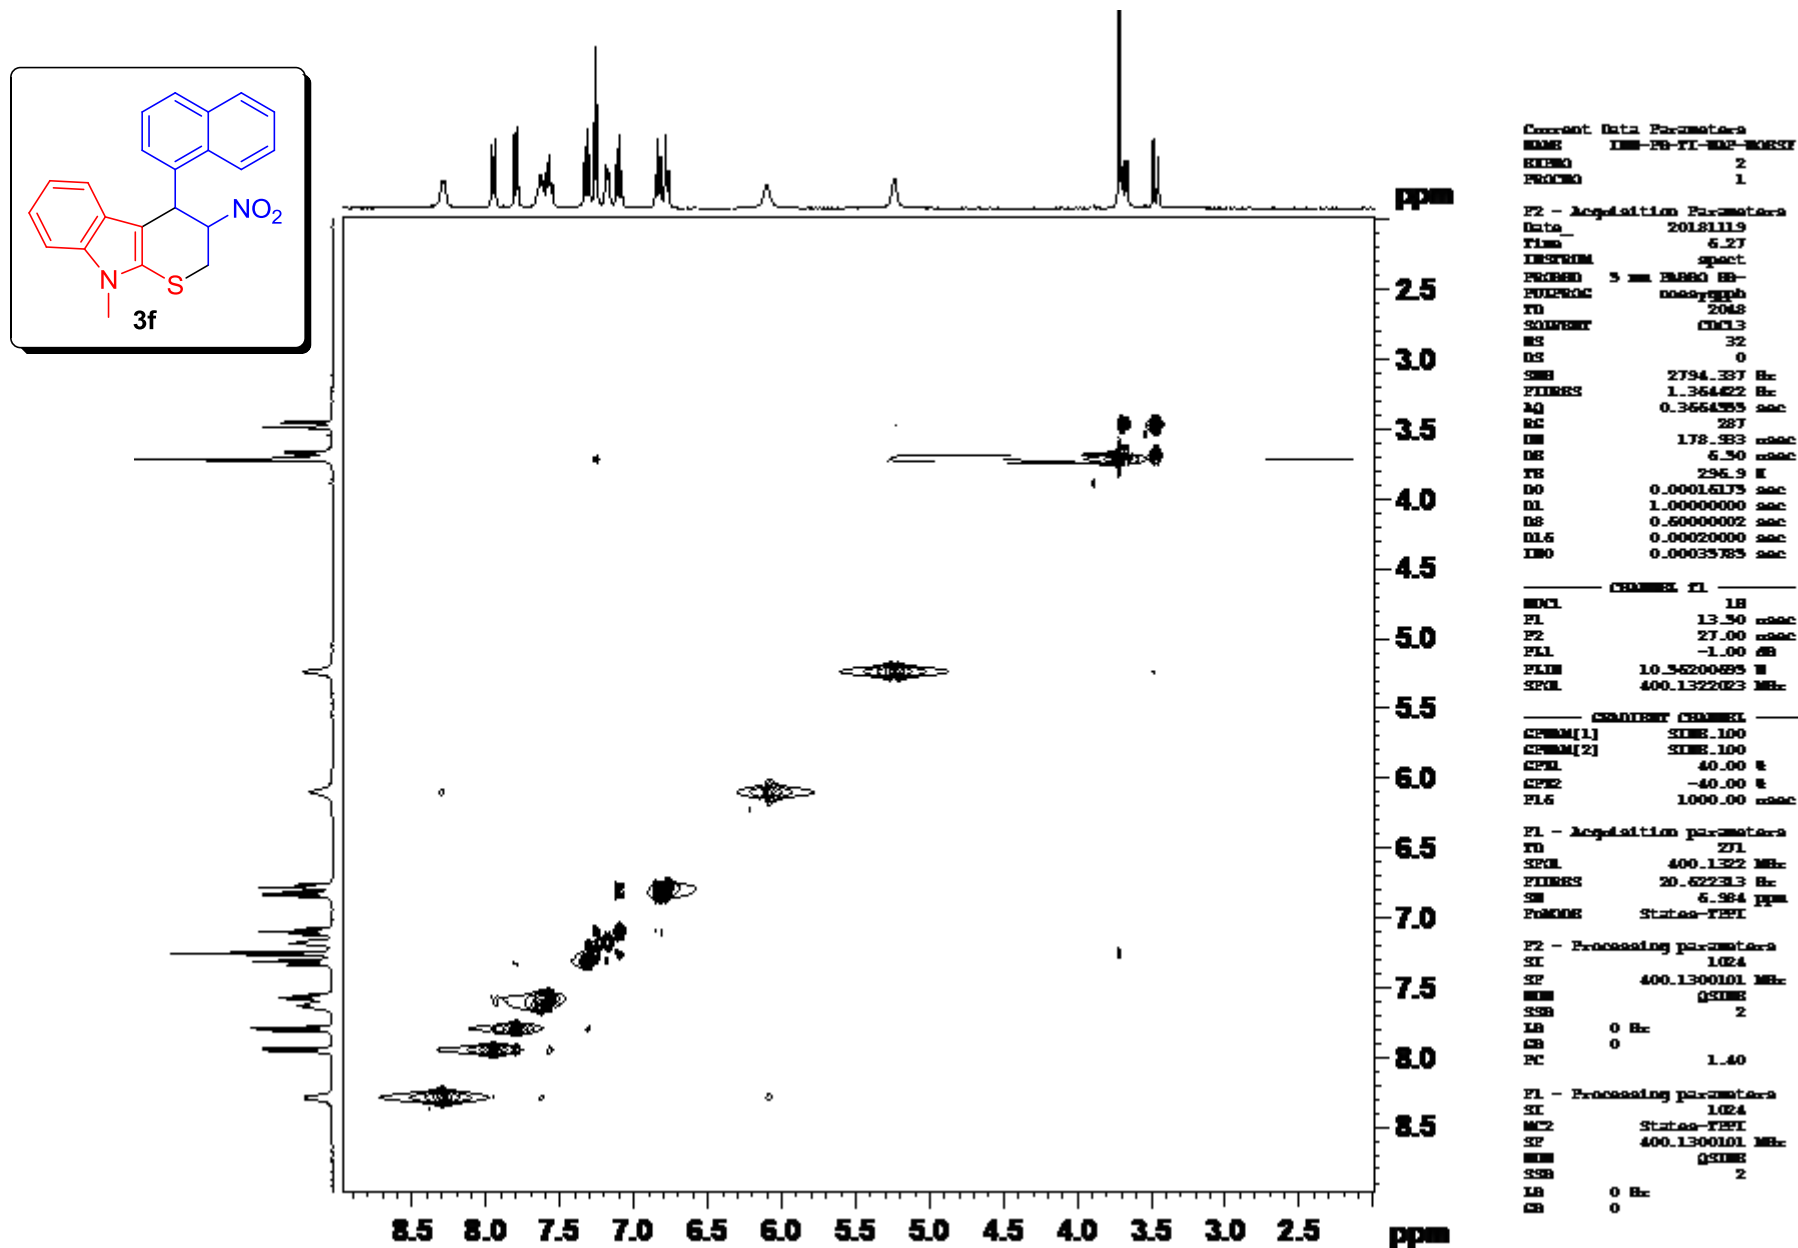Figure S21.  $^1\text{H}$ - $^1\text{H}$  NOESY NMR Spectrum of 3f (major + minor, dr >95:05)



Current Data Parameters  
NAME INN-PB-TI-NO2-1H  
EXPNO 2  
PROCNO 1

F2 - Acquisition Parameters  
Date\_ 20190719  
Time\_ 21.36  
INSTRUM spect  
PROBHD 5 mm PABBO BB-  
PULPROG zg30  
TD 54274  
SOLVENT CDCl3  
NS 6  
DS 0  
SWH 8223.685 Hz  
FIDRES 0.151522 Hz  
AQ 3.2998593 sec  
RG 287  
DW 60.800 usec  
DE 6.50 usec  
TE 294.2 K  
D1 1.00000000 sec  
TD0 1

==== CHANNEL f1 =====  
NUC1 1H  
P1 14.75 usec  
PL1 -1.00 dB  
PL1W 10.56200695 W  
SFO1 400.1324710 MHz

F2 - Processing parameters  
SI 32768  
SF 400.1300102 MHz  
WDW EM  
SSB 0  
LB 0.30 Hz  
GB 0  
PC 1.00

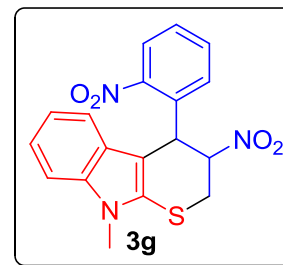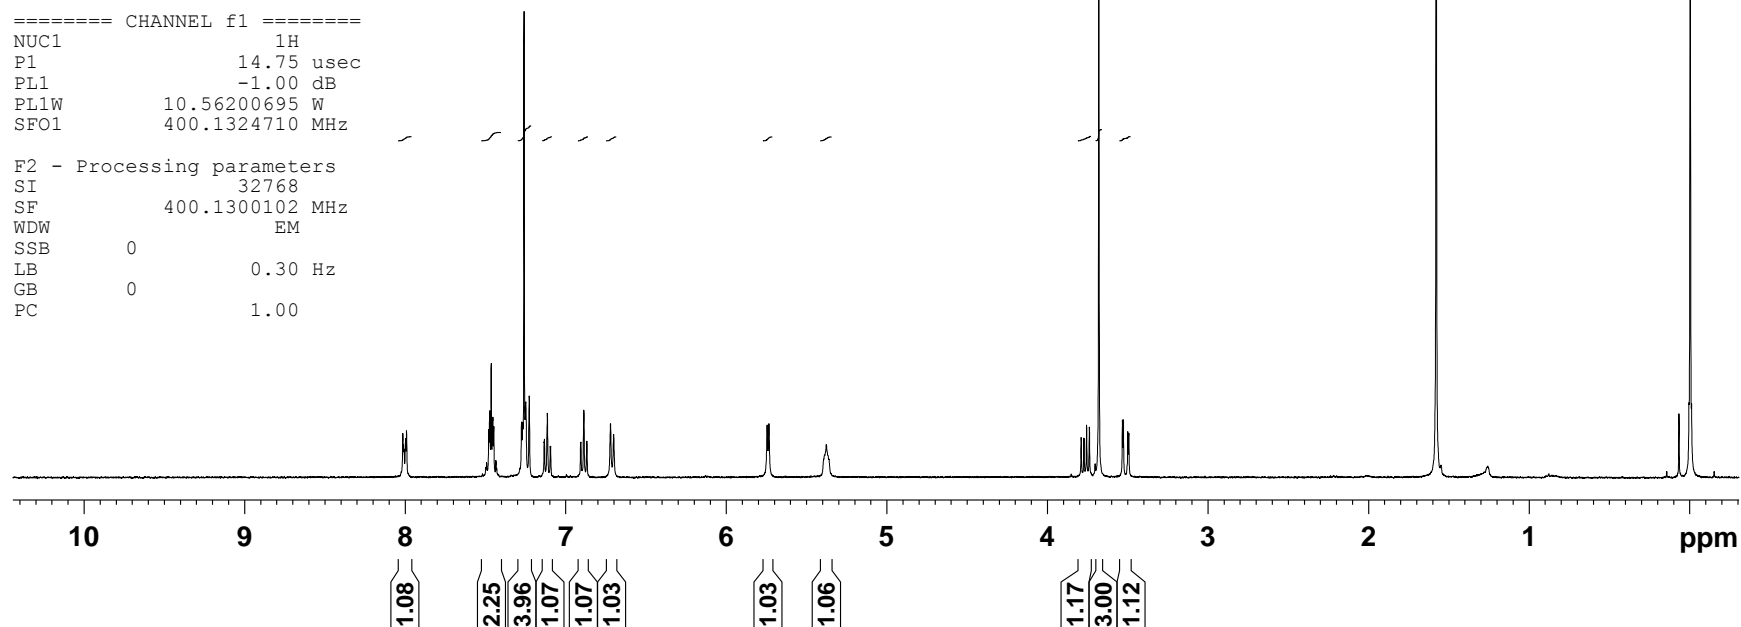

Figure S22. <sup>1</sup>H NMR Spectrum of 3g (major + minor, dr >95:05)

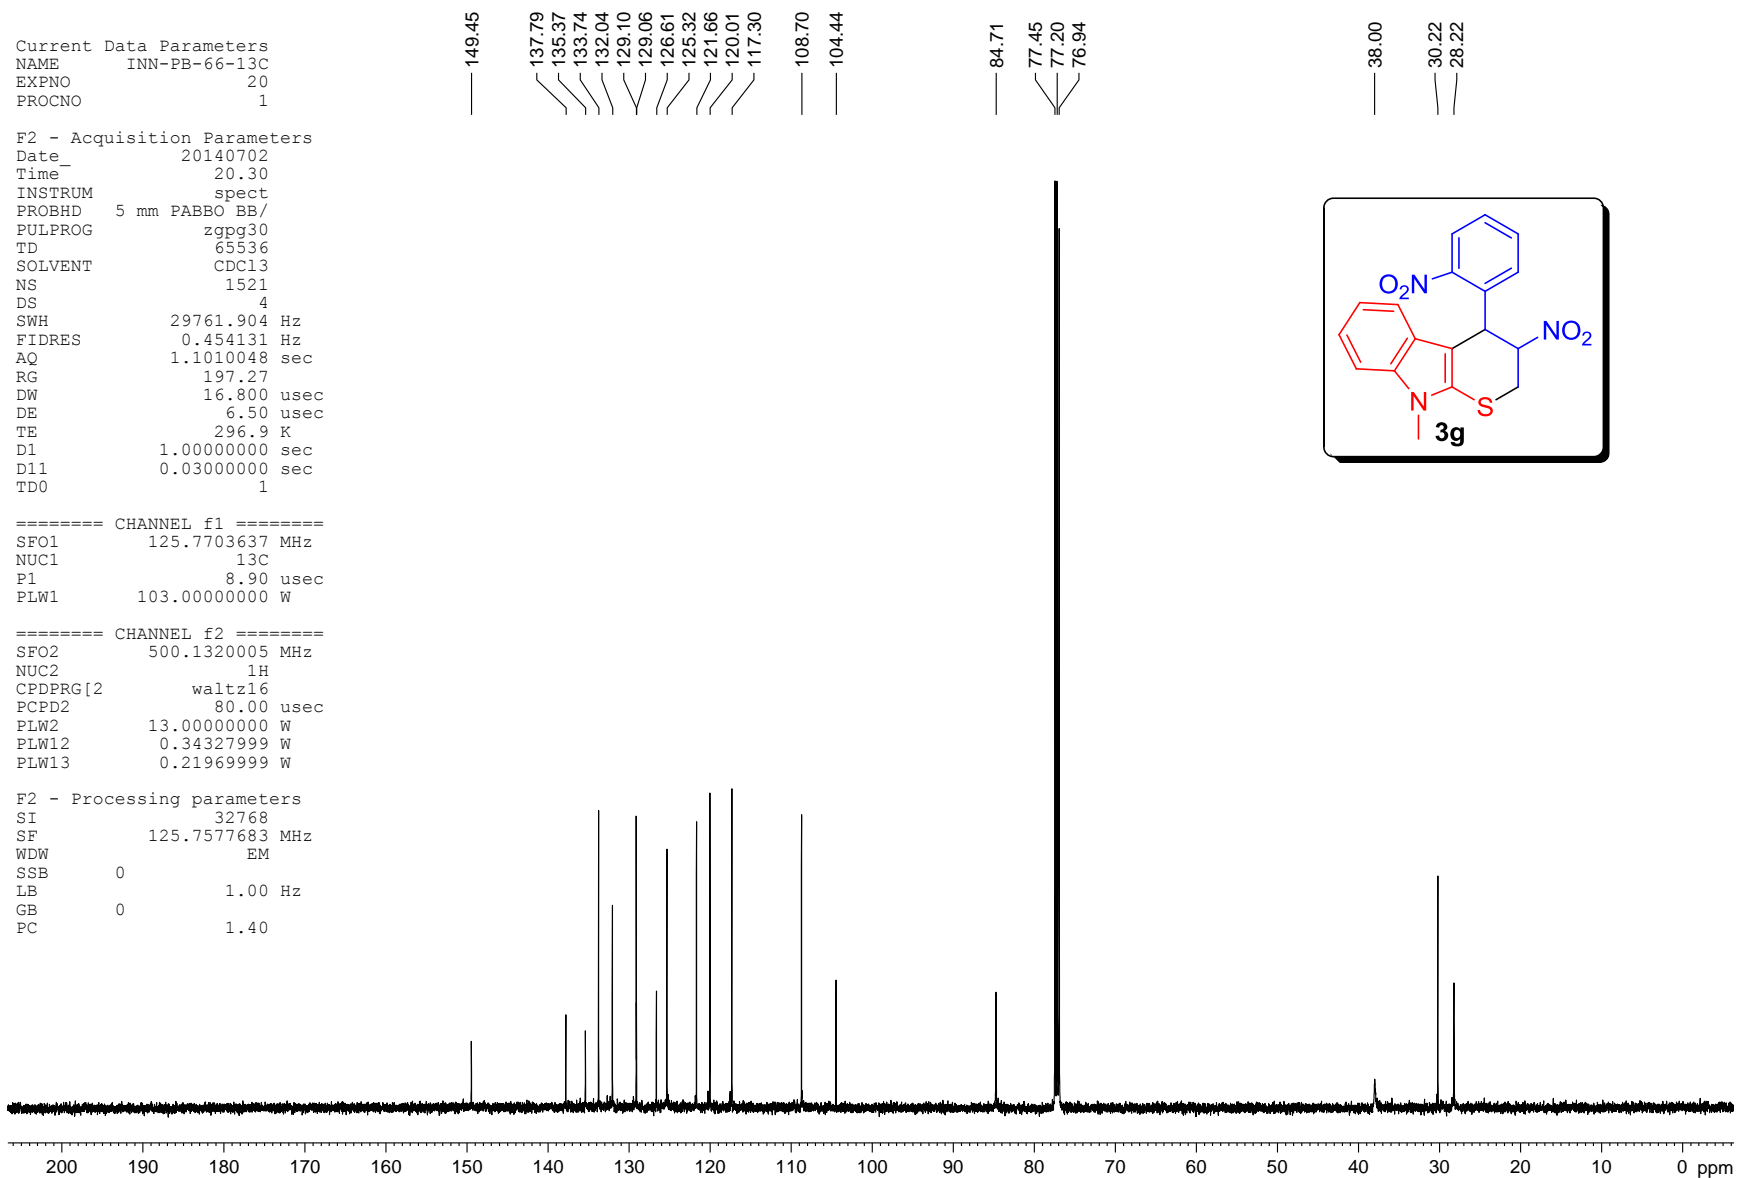Figure S23. <sup>13</sup>C NMR Spectrum of 3g (major + minor, dr >95:05)

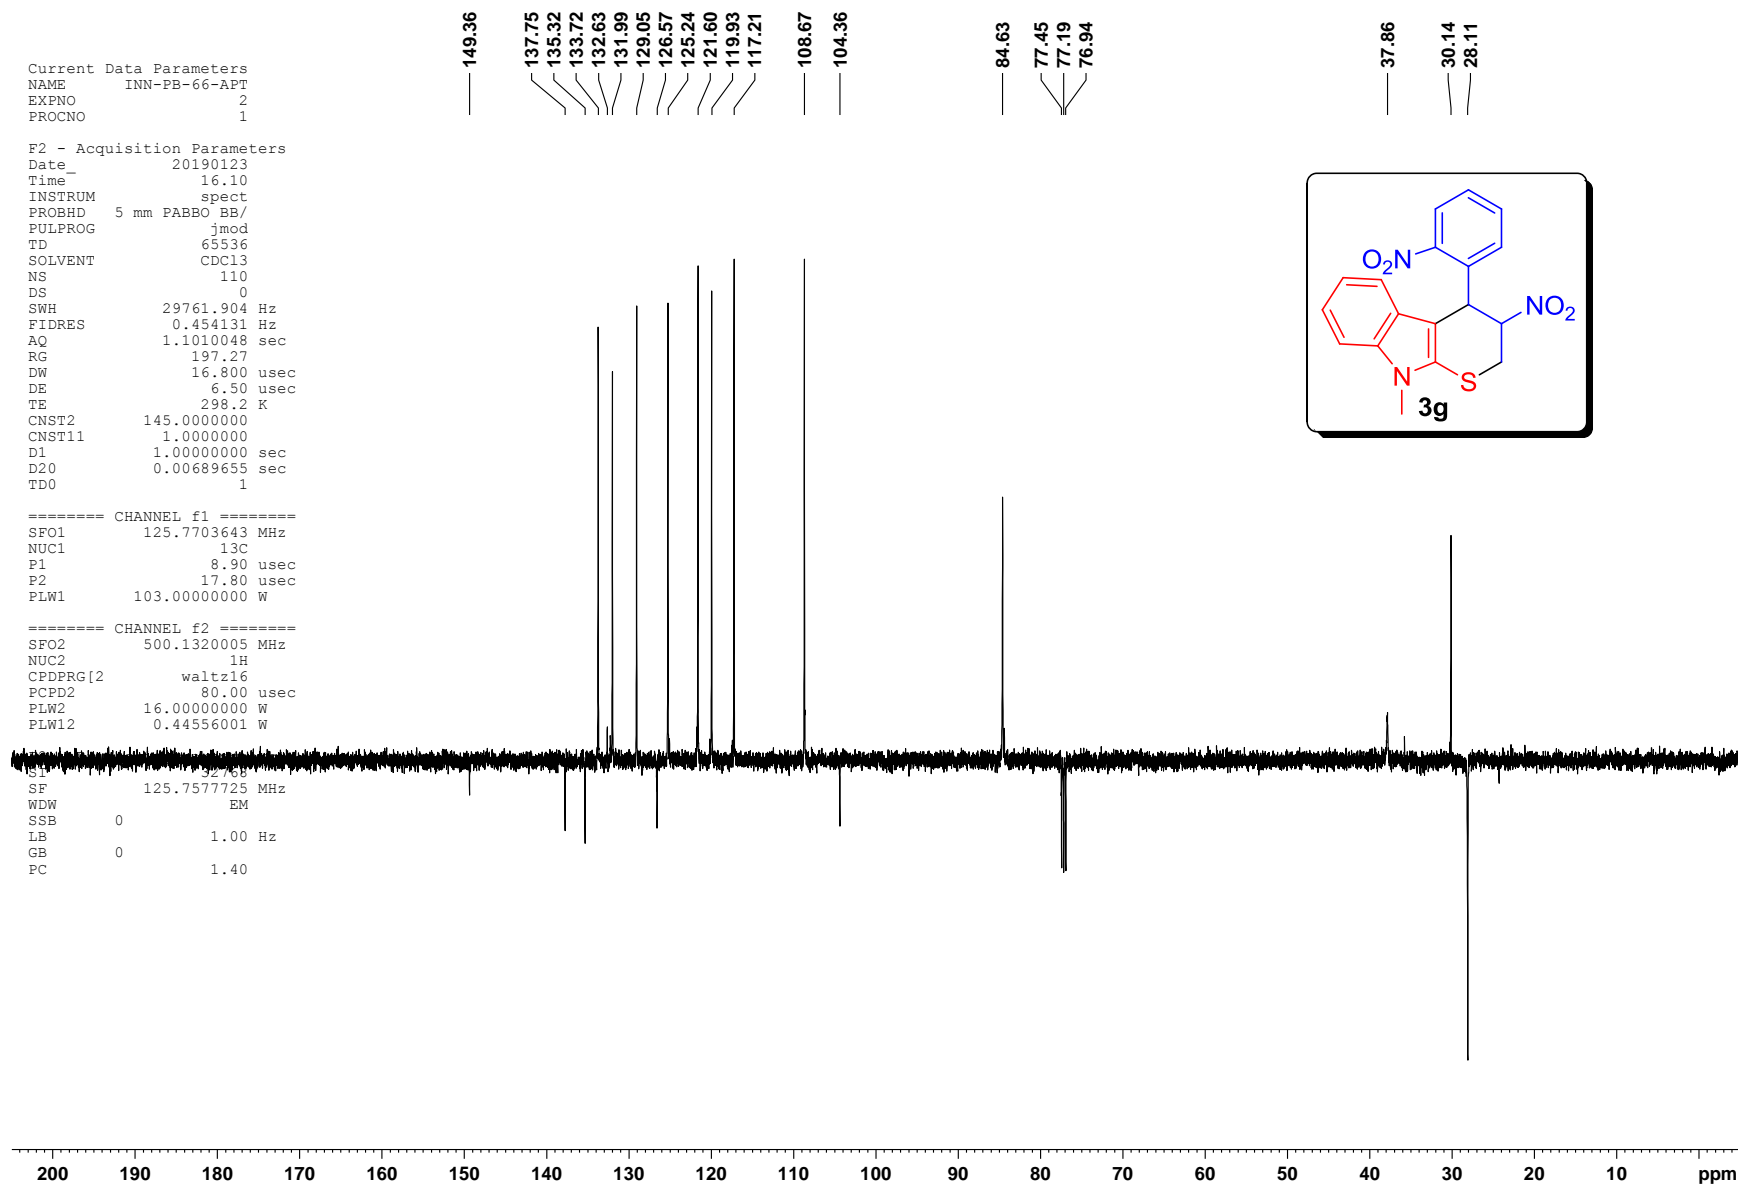Figure S24. <sup>13</sup>C-APT NMR Spectrum of 3g (major + minor, dr >95:05)

Current Data Parameters  
NAME INN-CH-66-1H  
EXPNO 9  
PROCNO 1

## F2 - Acquisition Parameters

Date\_ 20140410  
Time\_ 17.59  
INSTRUM spect  
PROBHD 5 mm SEI 1H/D-  
PULPROG zg30  
TD 65536  
SOLVENT CDCl3  
NS 16  
DS 0  
SWH 8223.685 Hz  
FIDRES 0.125483 Hz  
AQ 3.9845889 sec  
RG 32  
DW 60.800 usec  
DE 6.50 usec  
TE 297.0 K  
D1 1.00000000 sec  
TD0 1

===== CHANNEL f1 =====

NUC1 1H  
P1 6.75 usec  
PL1 -3.00 dB  
PL1W 16.73965454 W  
SFO1 400.1324710 MHz

## F2 - Processing parameters

SI 32768  
SF 400.1300095 MHz  
WDW EM  
SSB 0  
LB 0.30 Hz  
GB 0  
PC 1.00

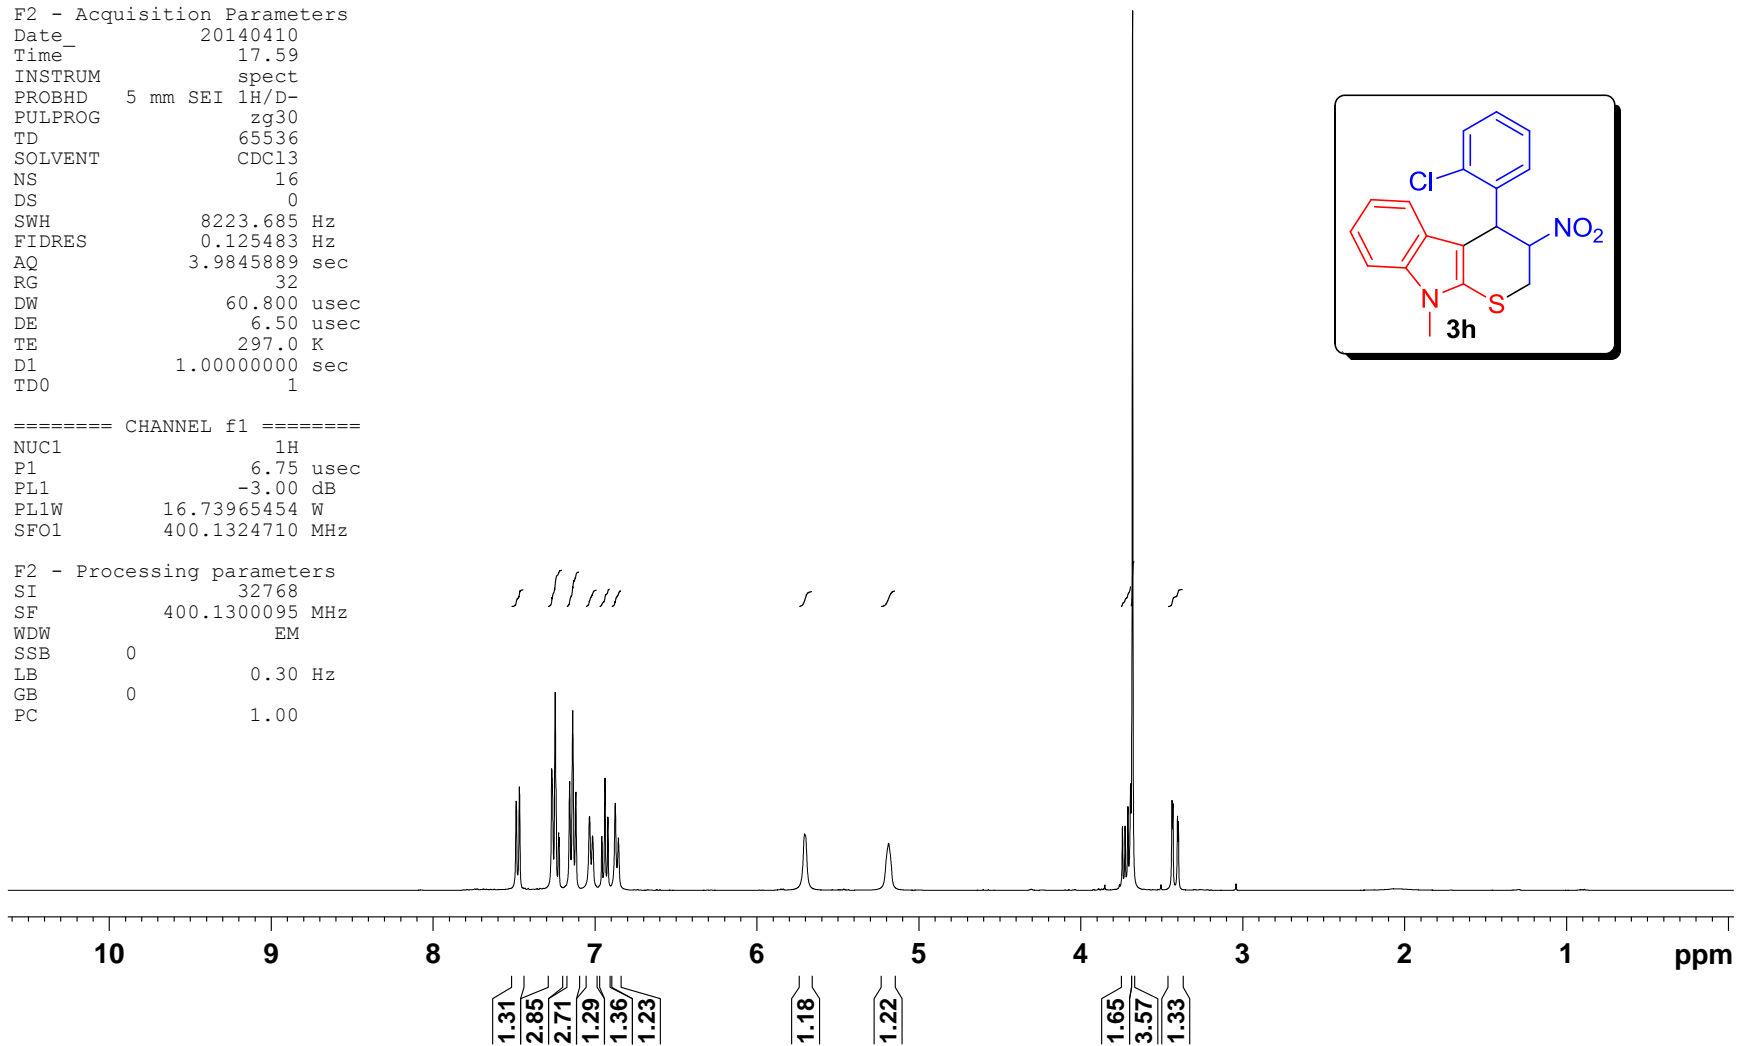

Figure S25. <sup>1</sup>H NMR Spectrum of 3h (major + minor, dr >95:05)

Current Data Parameters  
 NAME INN-CH-66-13C  
 EXPNO 10  
 PROCNO 1

F2 - Acquisition Parameters  
 Date\_ 20140410  
 Time\_ 17.50  
 INSTRUM spect  
 PROBHD 5 mm SEI 1H/D-  
 PULPROG zgpg30  
 TD 65536  
 SOLVENT CDCl3  
 NS 202  
 DS 4  
 SWH 24038.461 Hz  
 FIDRES 0.366798 Hz  
 AQ 1.3631488 sec  
 RG 2050  
 DW 20.800 usec  
 DE 6.50 usec  
 TE 297.3 K  
 D1 1.00000000 sec  
 D11 0.03000000 sec  
 TD0 1

===== CHANNEL f1 =====  
 NUC1 13C  
 P1 13.00 usec  
 PL1 -3.00 dB  
 PL1W 71.16858673 W  
 SFO1 100.6228298 MHz

===== CHANNEL f2 =====  
 CPDPRG[2] waltz16  
 NUC2 1H  
 PCPD2 80.00 usec  
 PL2 -3.00 dB  
 PL12 18.48 dB  
 PL13 19.00 dB  
 PL2W 16.73965454 W  
 PL12W 0.11905469 W  
 PL13W 0.10562007 W  
 SFO2 400.1316005 MHz

F2 - Processing parameters  
 SI 32768  
 SF 100.6127579 MHz  
 WDW EM  
 SSB 0  
 LB 2.00 Hz  
 GB 0  
 PC 1.40

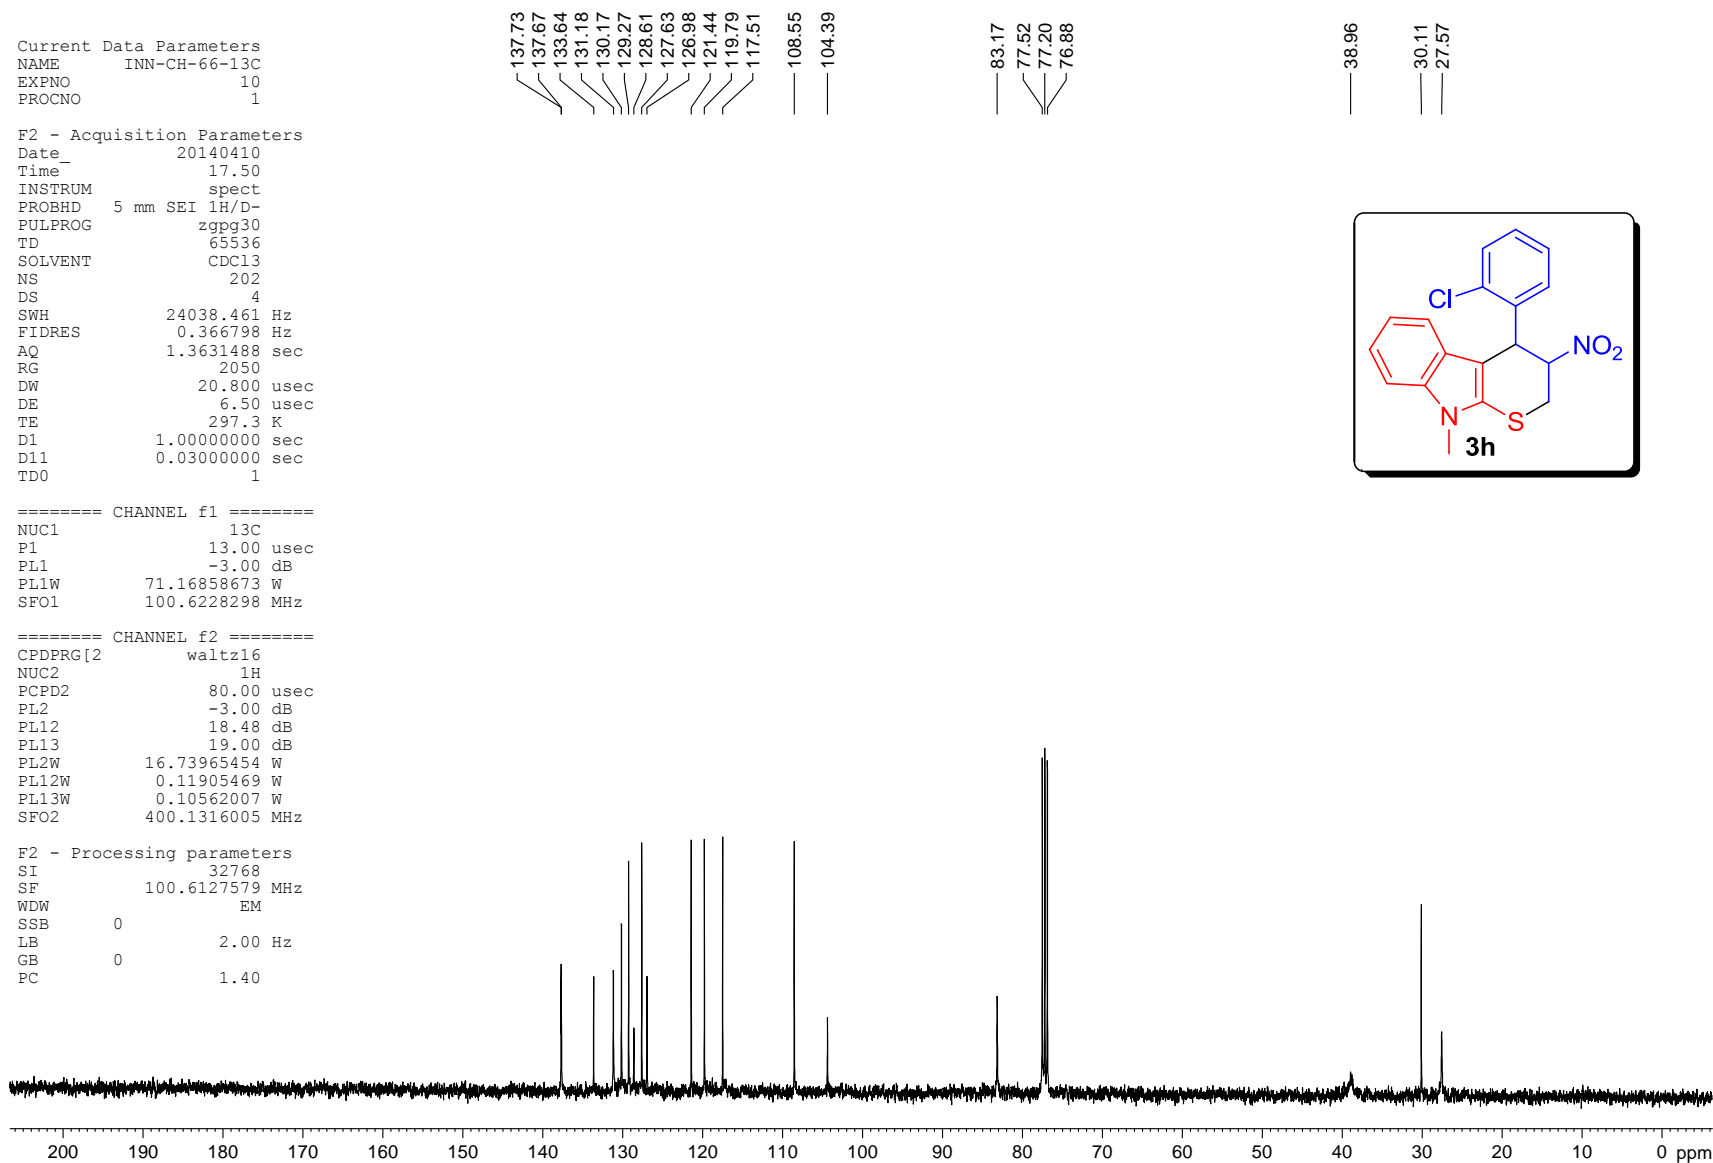

Figure S26. <sup>13</sup>C NMR Spectrum of 3h (major + minor, dr >95:05)

Current Data Parameters  
 NAME INN-PB-TI-5-BR-1H  
 EXPNO 6  
 PROCNO 1

F2 - Acquisition Parameters  
 Date\_ 20190130  
 Time\_ 13.14  
 INSTRUM spect  
 PROBHD 5 mm PABBO BB/  
 PULPROG zg30  
 TD 65536  
 SOLVENT CDCl3  
 NS 5  
 DS 0  
 SWH 10000.000 Hz  
 FIDRES 0.152588 Hz  
 AQ 3.2767999 sec  
 RG 30.72  
 DW 50.000 usec  
 DE 6.50 usec  
 TE 297.6 K  
 D1 1.00000000 sec  
 TD0 1

==== CHANNEL f1 =====  
 SFO1 500.1330885 MHz  
 NUC1 1H  
 P1 13.35 usec  
 PLW1 16.00000000 W

F2 - Processing parameters  
 SI 65536  
 SF 500.1300111 MHz  
 WDW EM  
 SSB 0  
 LB 0.30 Hz  
 GB 0  
 PC 1.00

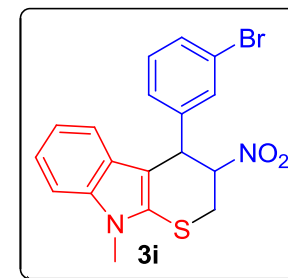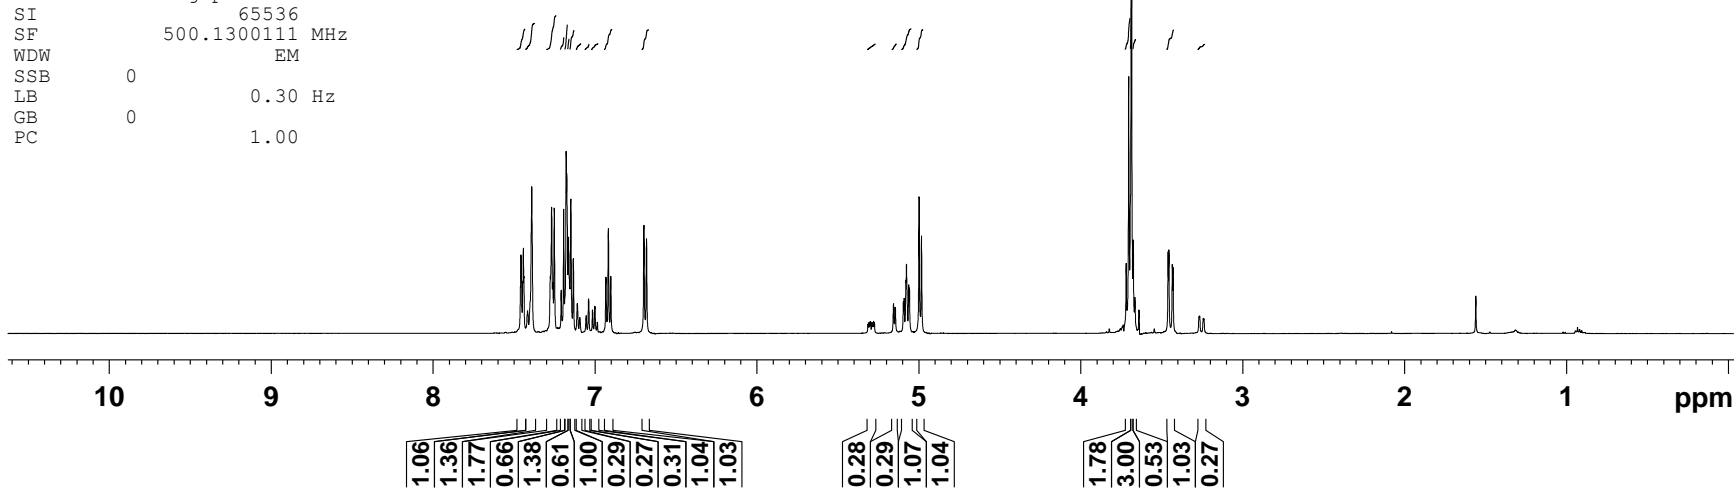

Figure S27. <sup>1</sup>H NMR Spectrum of 3i (major + minor, dr 81:19)

Current Data Parameters  
 NAME INN-PB-TI-5-BR-13C  
 EXPNO 8  
 PROCNO 1

F2 - Acquisition Parameters  
 Date\_ 20190130  
 Time\_ 13.20  
 INSTRUM spect  
 PROBHD 5 mm PABBO BB/  
 PULPROG zgpg30  
 TD 65536  
 SOLVENT CDC13  
 NS 116  
 DS 0  
 SWH 29761.904 Hz  
 FIDRES 0.454131 Hz  
 AQ 1.1010048 sec  
 RG 197.27  
 DW 16.800 usec  
 DE 6.50 usec  
 TE 298.2 K  
 D1 1.00000000 sec  
 D11 0.03000000 sec  
 TD0 1

===== CHANNEL f1 =====  
 SFO1 125.7703637 MHz  
 NUC1 13C  
 P1 8.90 usec  
 PLW1 103.00000000 W

===== CHANNEL f2 =====  
 SFO2 500.1320005 MHz  
 NUC2 1H  
 CPDPRG2 waltz16  
 PCPD2 80.00 usec  
 PLW2 16.00000000 W  
 PLW12 0.44556001 W  
 PLW13 0.22411001 W

F2 - Processing parameters  
 SI 32768  
 SF 125.7577796 MHz  
 WDW EM  
 SSB 0  
 LB 1.00 Hz  
 GB 0  
 PC 1.40

142.54  
 140.18  
 138.12  
 137.79  
 132.01  
 131.57  
 131.42  
 131.32  
 130.67  
 130.27  
 128.30  
 128.10  
 127.89  
 127.32  
 126.80  
 126.74  
 123.19  
 123.00  
 121.58  
 121.47  
 120.05  
 119.87  
 118.06  
 116.85  
 108.69  
 108.62  
 105.88  
 105.52  
 88.45  
 85.55  
 77.45  
 77.20  
 76.94

43.78  
 41.94

30.32  
 30.16  
 29.30  
 22.73

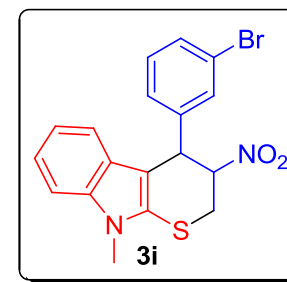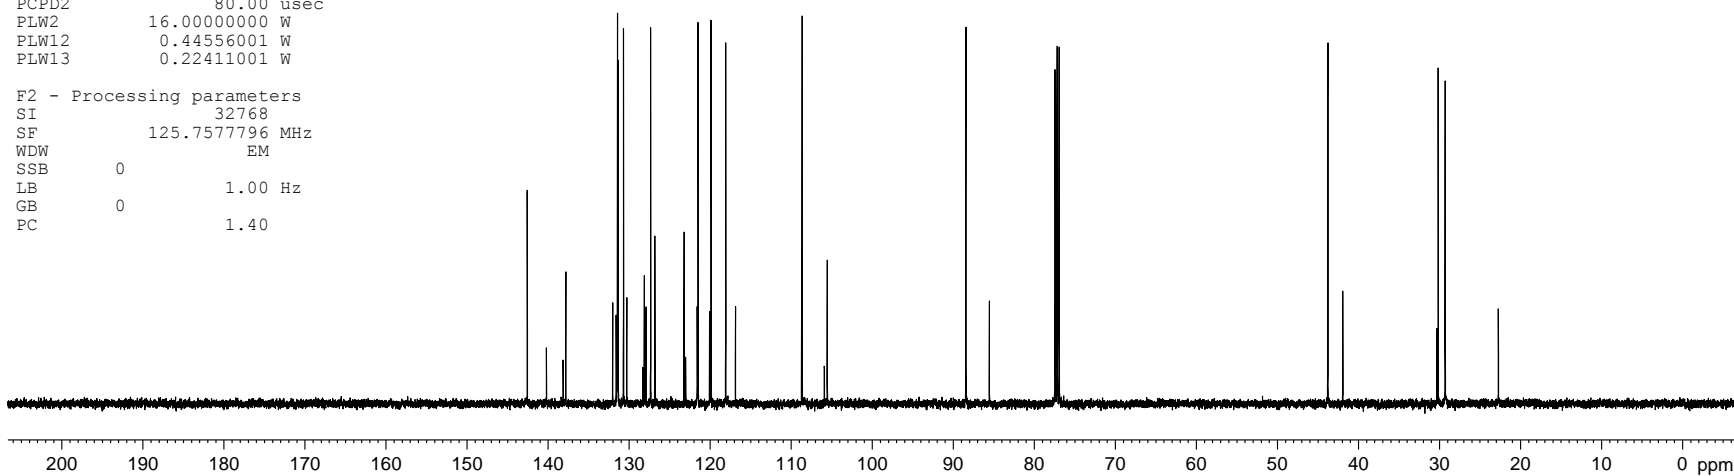

Figure S28.  $^{13}\text{C}$  NMR Spectrum of 3i (major + minor, dr 81:19)





Current Data Parameters  
NAME INN-PB-86-C-1H  
EXPNO 10  
PROCNO 1

F2 - Acquisition Parameters  
Date\_ 20150121  
Time\_ 22.37  
INSTRUM spect  
PROBHD 5 mm PABBO BB/  
PULPROG zg30  
TD 65536  
SOLVENT CDC13  
NS 16  
DS 2  
SWH 10000.000 Hz  
FIDRES 0.152588 Hz  
AQ 3.2767999 sec  
RG 30.72  
DW 50.000 usec  
DE 6.50 usec  
TE 297.1 K  
D1 1.00000000 sec  
TD0 1

==== CHANNEL f1 =====  
SFO1 500.1330885 MHz  
NUC1 1H  
P1 13.00 usec  
PLW1 13.00000000 W

F2 - Processing parameters  
SI 65536  
SF 500.1300123 MHz  
WDW EM  
SSB 0  
LB 0.30 Hz  
GB 0  
PC 1.00

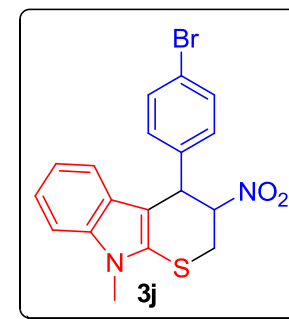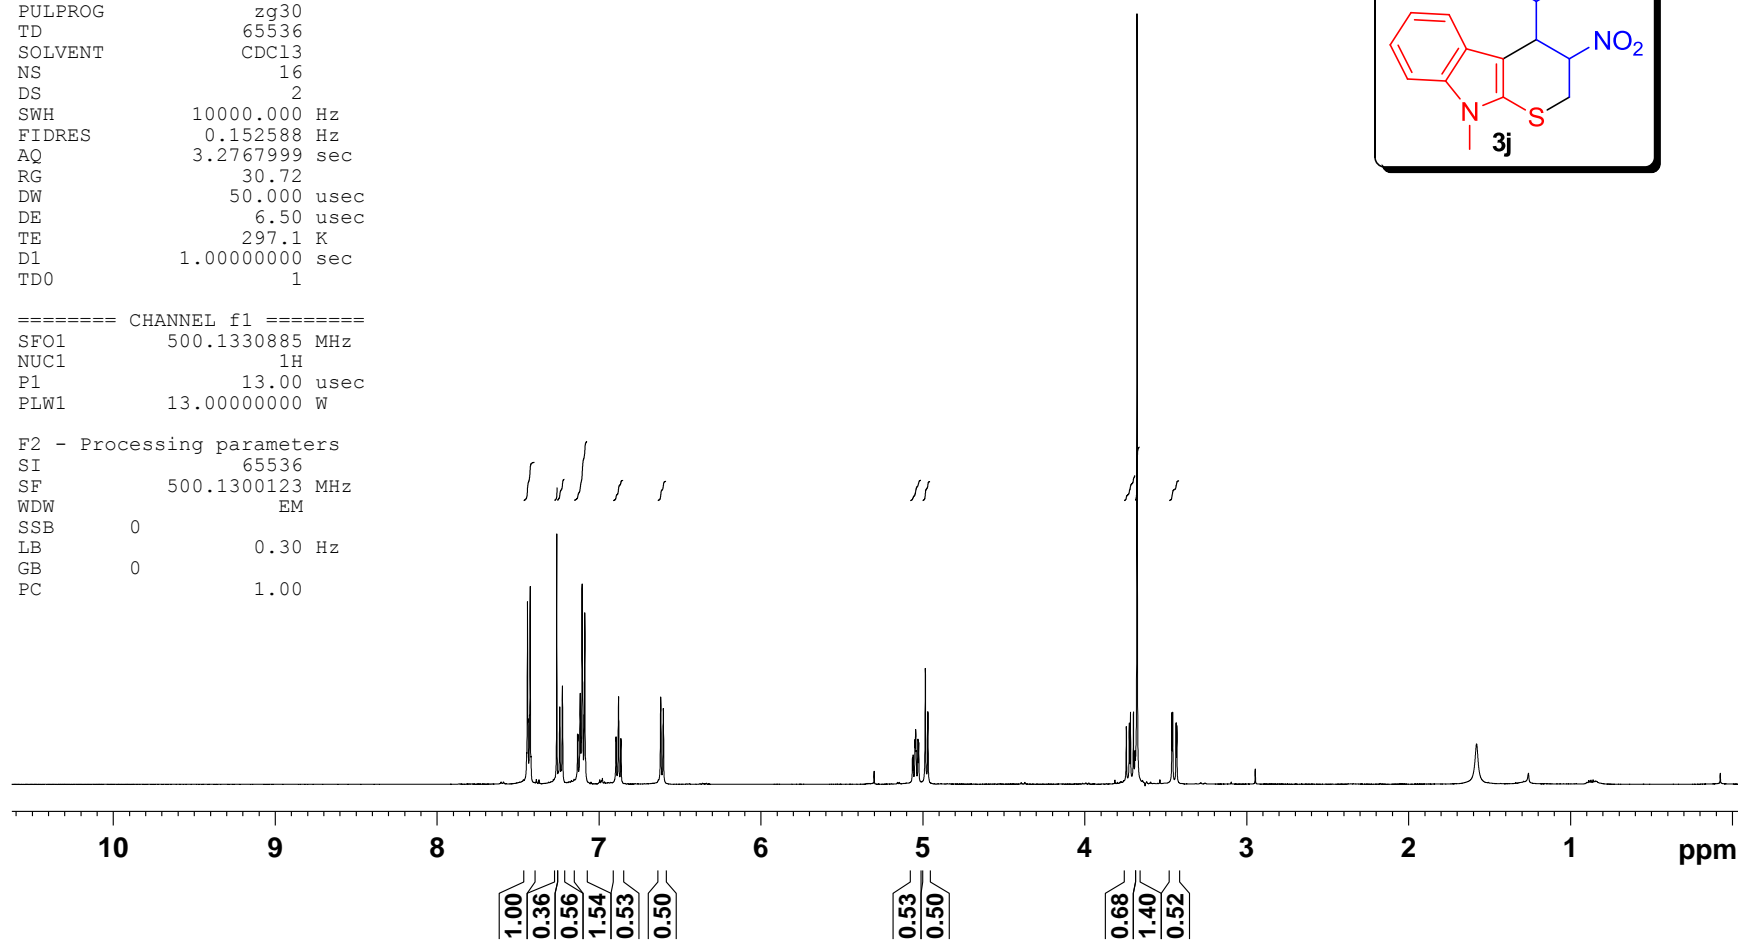

Figure S30. <sup>1</sup>H NMR Spectrum of 3j (Major isomer)

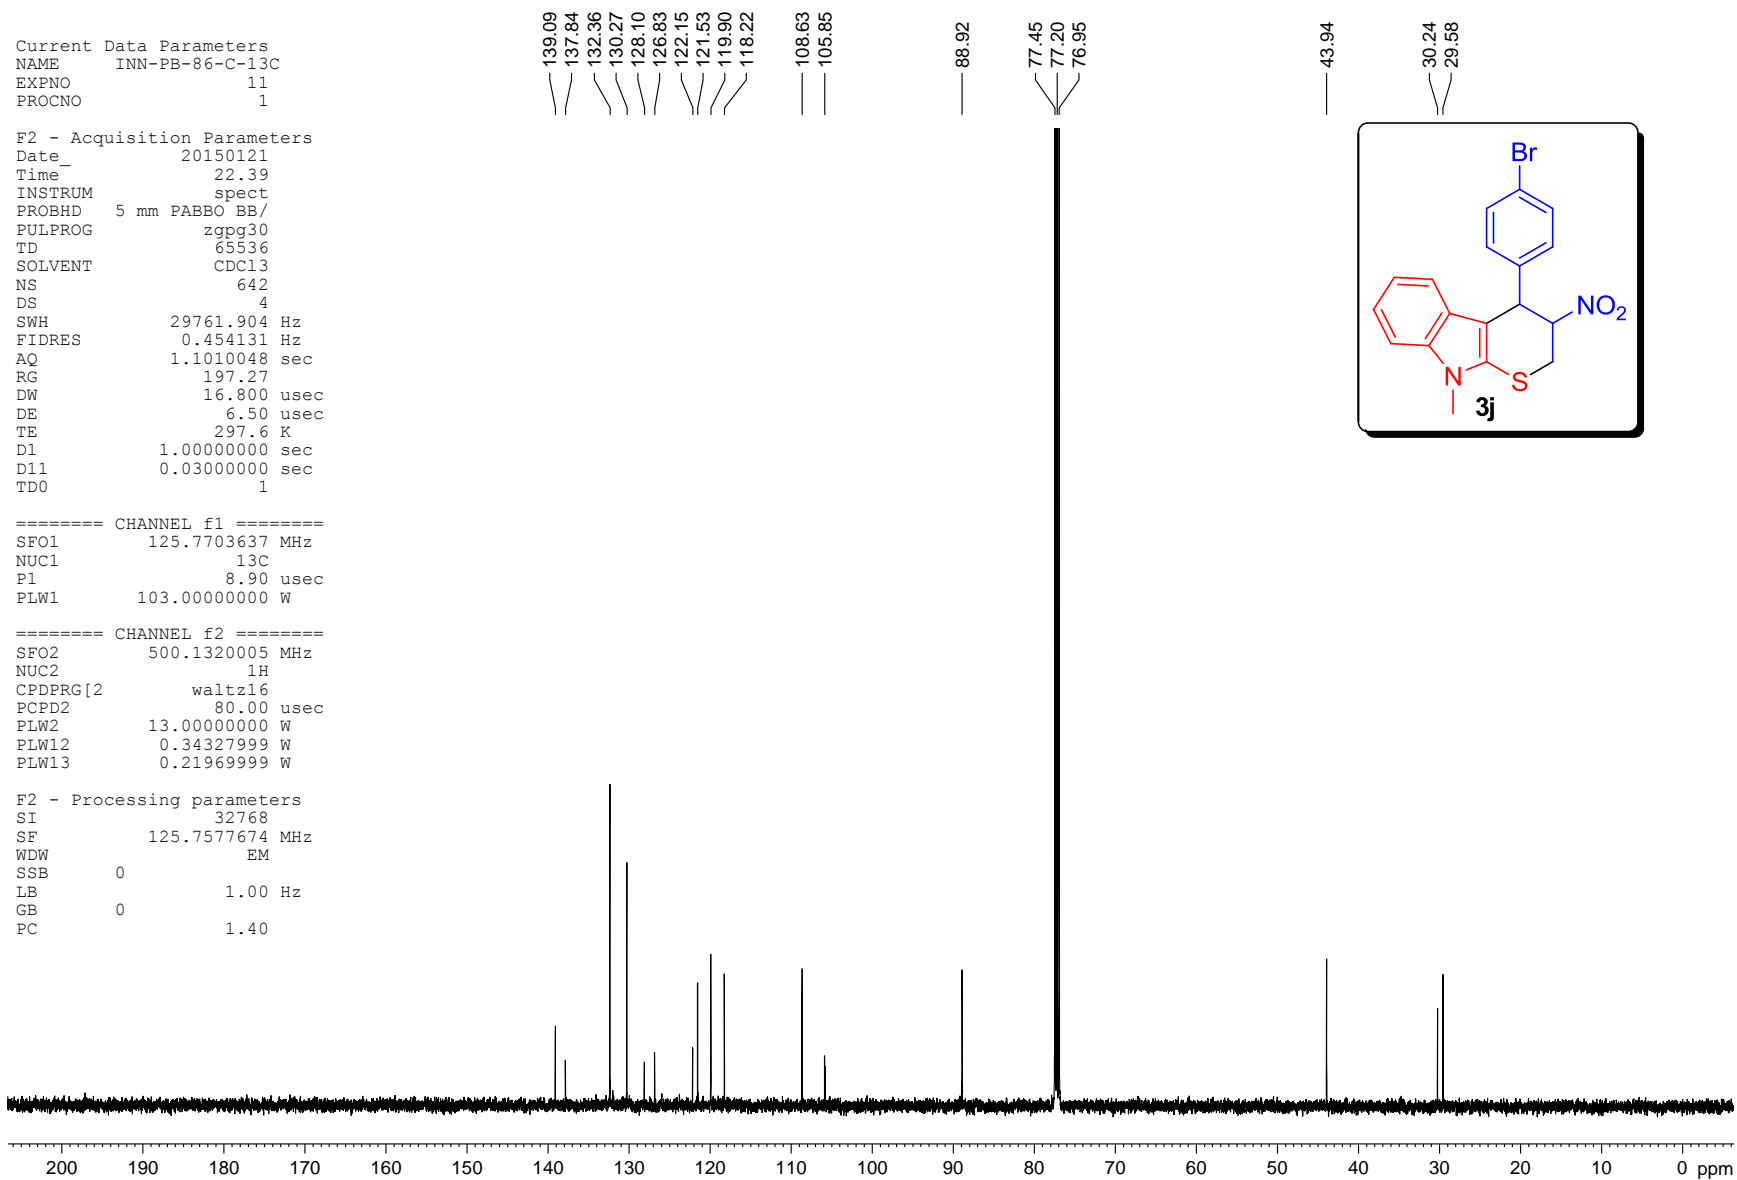

Current Data Parameters  
 NAME INN-PB-TI-4-BR-1H  
 EXPNO 6  
 PROCNO 1

F2 - Acquisition Parameters  
 Date\_ 20170327  
 Time\_ 0.10  
 INSTRUM spect  
 PROBHD 5 mm PABBO BB/  
 PULPROG zg30  
 TD 65536  
 SOLVENT CDC13  
 NS 6  
 DS 0  
 SWH 10000.000 Hz  
 FIDRES 0.152588 Hz  
 AQ 3.2767999 sec  
 RG 119.07  
 DW 50.000 usec  
 DE 6.50 usec  
 TE 298.6 K  
 D1 1.00000000 sec  
 TD0 1

==== CHANNEL f1 =====  
 SFO1 500.1330885 MHz  
 NUC1 1H  
 P1 13.00 usec  
 PLW1 13.00000000 W

F2 - Processing parameters  
 SI 65536  
 SF 500.1300130 MHz  
 WDW EM  
 SSB 0  
 LB 0.30 Hz  
 GB 0  
 PC 1.00

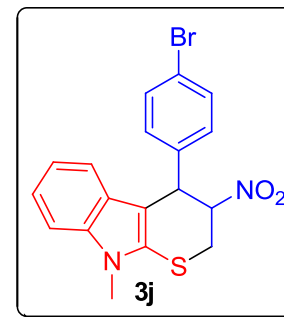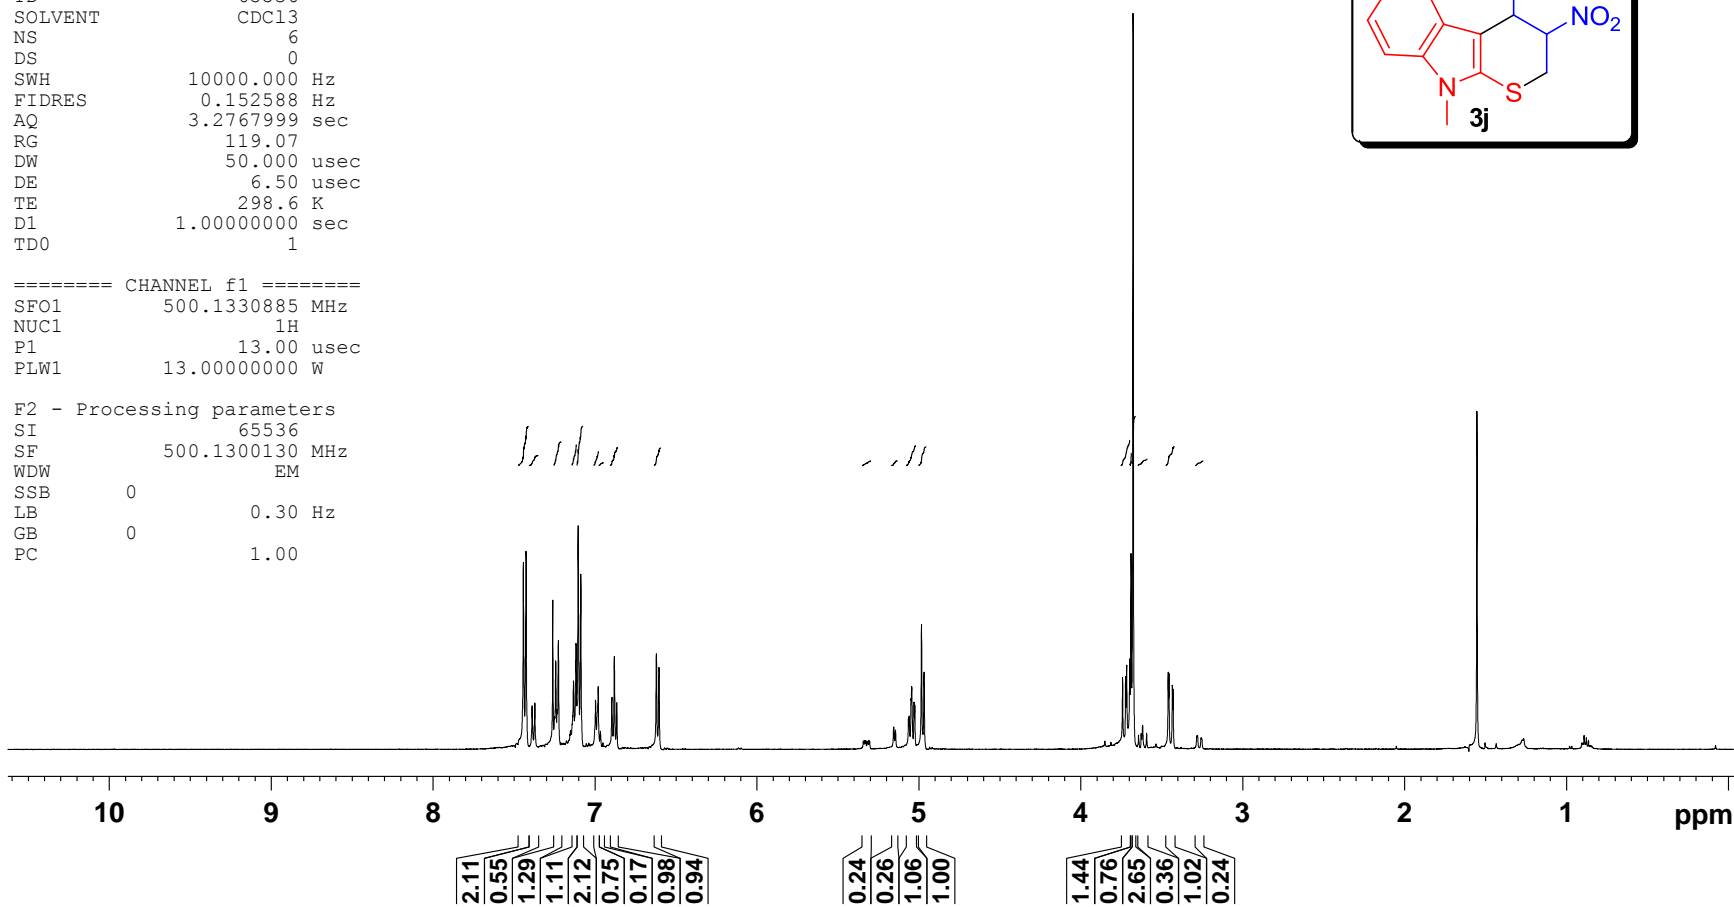

Figure S32.  $^1\text{H}$  NMR Spectrum of 3j (major + minor, dr 87:13)

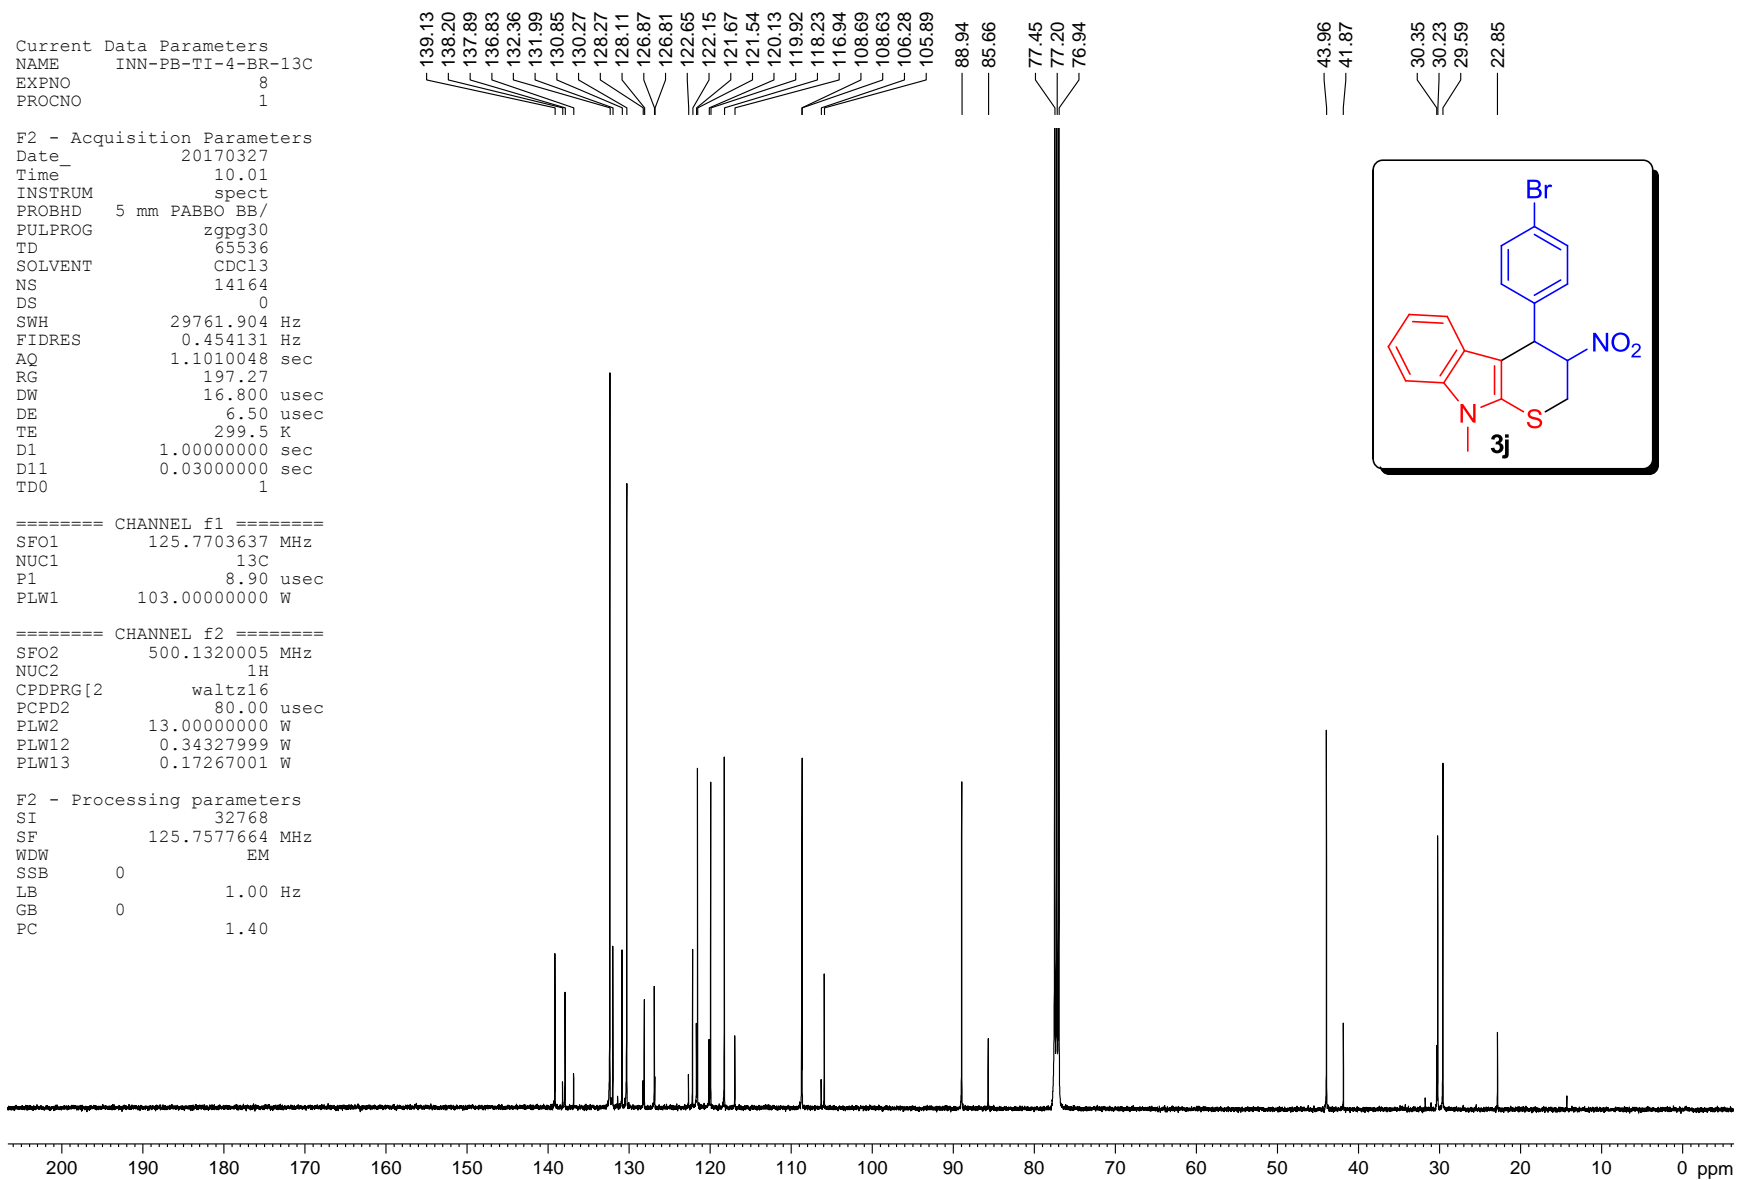Figure S33. <sup>13</sup>C NMR Spectrum of 3j (major + minor, dr 87:13)

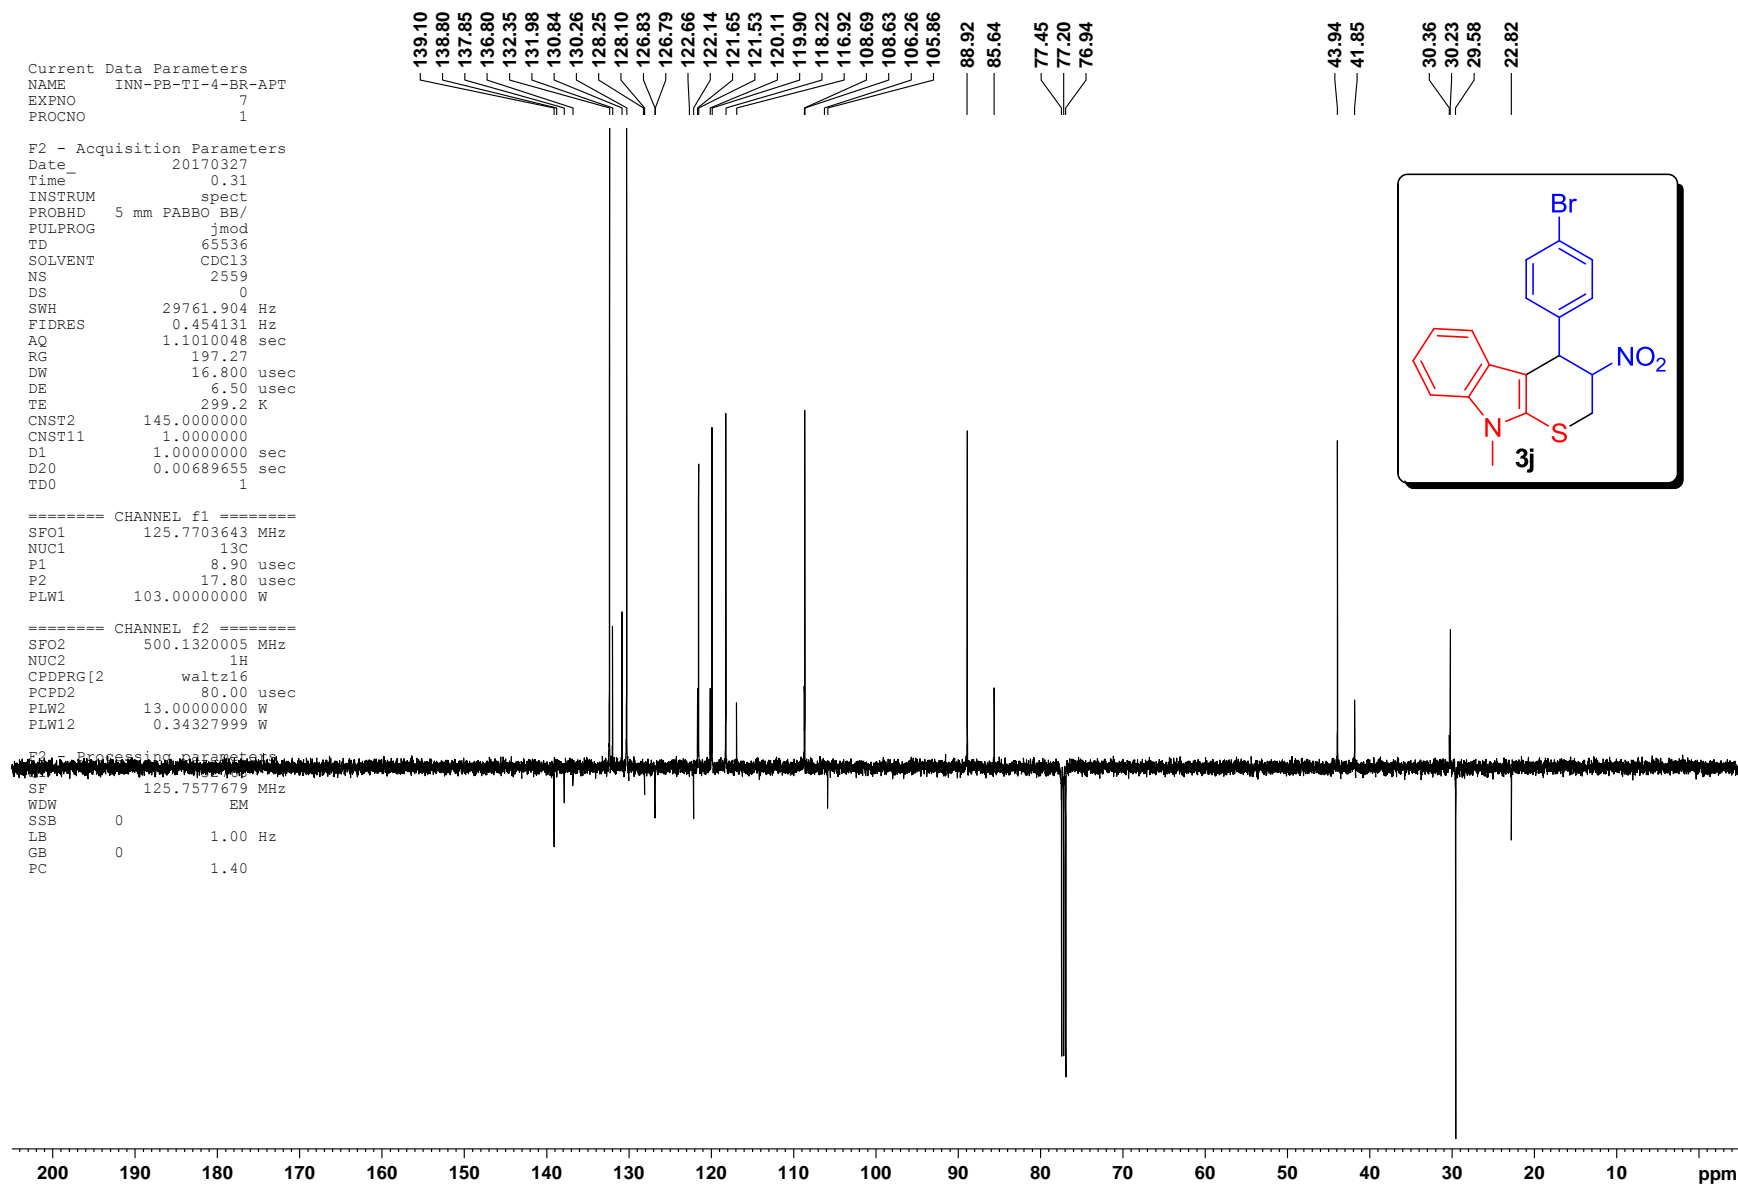Figure S34. <sup>13</sup>C-APT NMR Spectrum of 3j (major + minor, dr 87:13)

Current Data Parameters  
 NAME INN-PB-P-CL-1H  
 EXPNO 1  
 PROCNO 1

F2 - Acquisition Parameters  
 Date\_ 20190125  
 Time\_ 13.15  
 INSTRUM spect  
 PROBHD 5 mm PABBO BB/  
 PULPROG zg30  
 TD 65536  
 SOLVENT CDC13  
 NS 5  
 DS 0  
 SWH 10000.000 Hz  
 FIDRES 0.152588 Hz  
 AQ 3.2767999 sec  
 RG 98.91  
 DW 50.000 usec  
 DE 6.50 usec  
 TE 298.0 K  
 D1 1.00000000 sec  
 TD0 1

==== CHANNEL f1 =====  
 SFO1 500.1330885 MHz  
 NUC1 1H  
 P1 13.35 usec  
 PLW1 16.00000000 W

F2 - Processing parameters  
 SI 65536  
 SF 500.1300136 MHz  
 WDW EM  
 SSB 0  
 LB 0.30 Hz  
 GB 0  
 PC 1.00

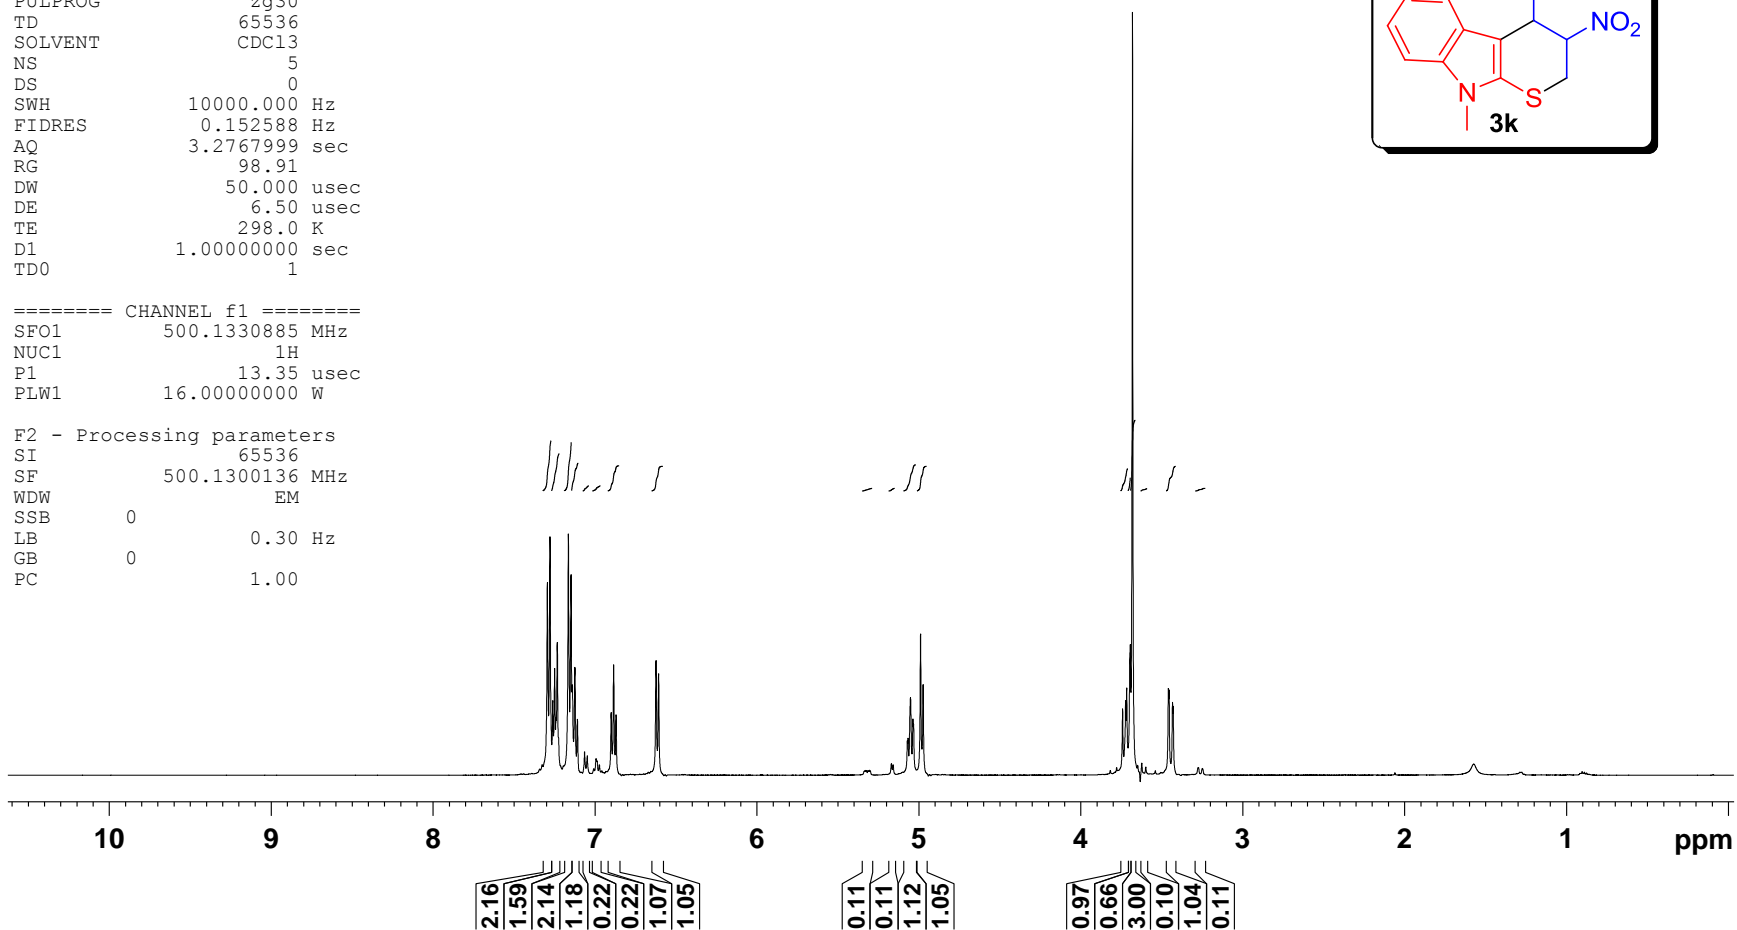

Figure S35. <sup>1</sup>H NMR Spectrum of 3k (major + minor, dr 90:10)

Current Data Parameters  
 NAME inn-pb-62-13c  
 EXPNO 2  
 PROCNO 1

F2 - Acquisition Parameters  
 Date\_ 20150223  
 Time\_ 10.55  
 INSTRUM spect  
 PROBHD 5 mm PABBO BB/  
 PULPROG zgpg30  
 TD 65536  
 SOLVENT CDC13  
 NS 1500  
 DS 4  
 SWH 29761.904 Hz  
 FIDRES 0.454131 Hz  
 AQ 1.1010048 sec  
 RG 197.27  
 DW 16.800 usec  
 DE 6.50 usec  
 TE 299.4 K  
 D1 1.00000000 sec  
 D11 0.03000000 sec  
 TD0 1

===== CHANNEL f1 =====  
 SFO1 125.7703637 MHz  
 NUC1 13C  
 P1 8.90 usec  
 PLW1 103.00000000 W

===== CHANNEL f2 =====  
 SFO2 500.1320005 MHz  
 NUC2 1H  
 CPDPRG[2] waltz16  
 PCPD2 80.00 usec  
 PLW2 13.00000000 W  
 PLW12 0.34327999 W  
 PLW13 0.21969999 W

F2 - Processing parameters  
 SI 32768  
 SF 125.7577697 MHz  
 WDW EM  
 SSB 0  
 LB 1.00 Hz  
 GB 0  
 PC 1.40

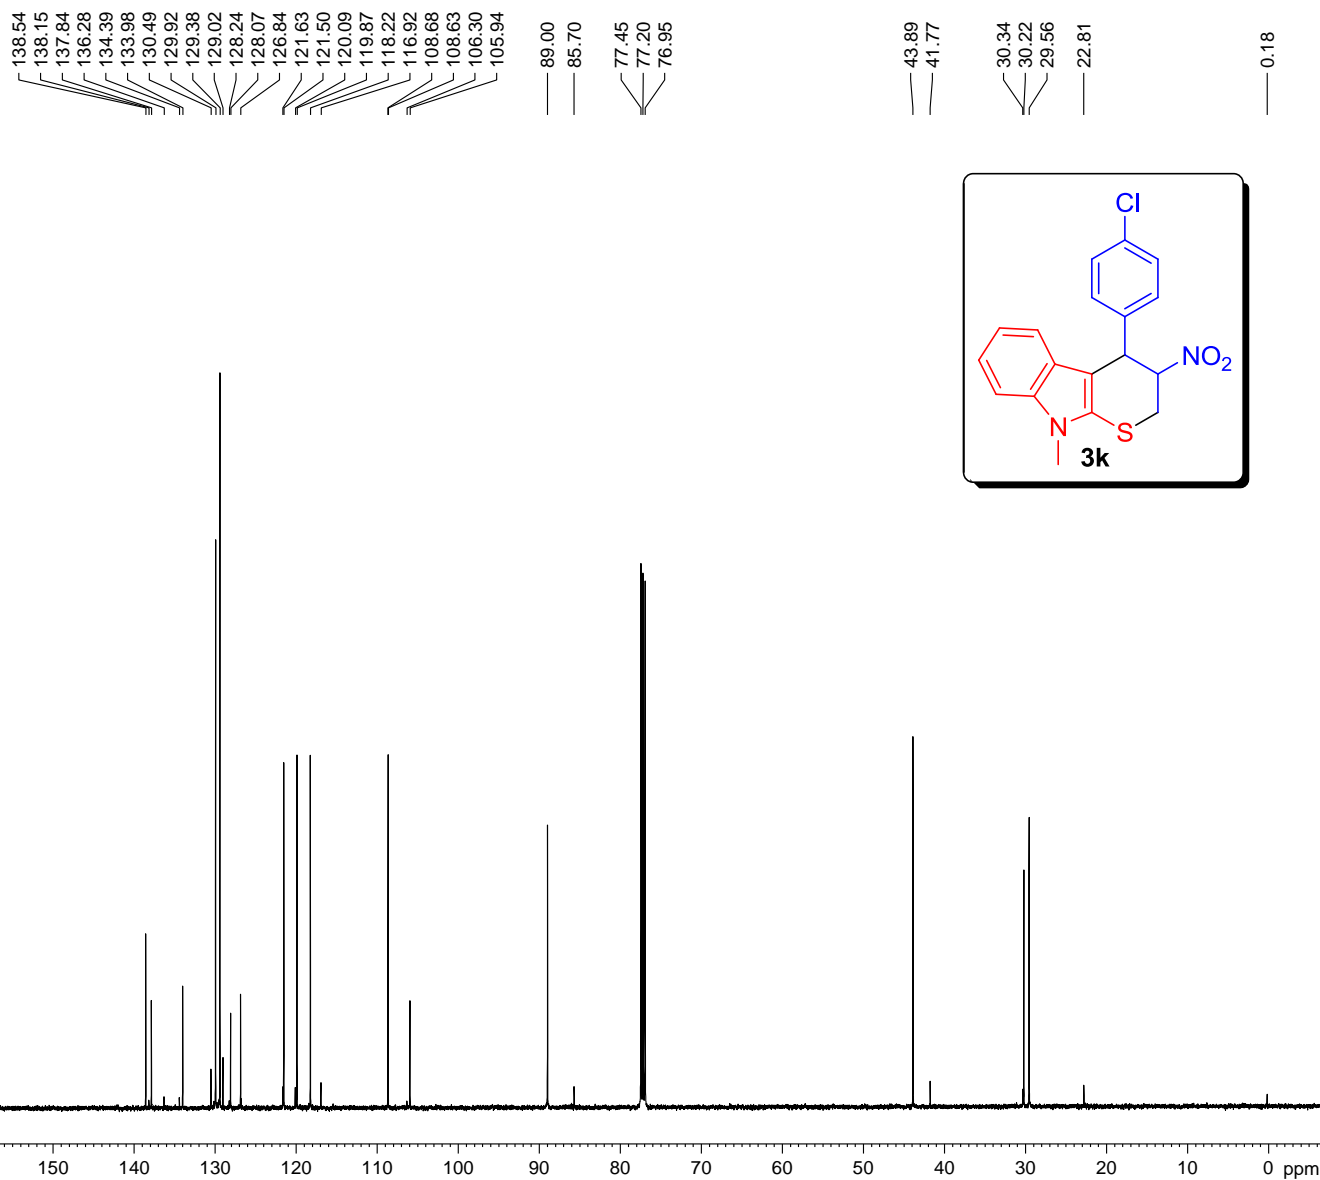

Figure S36.  $^{13}\text{C}$  NMR Spectrum of 3k (major + minor, dr 90:10)

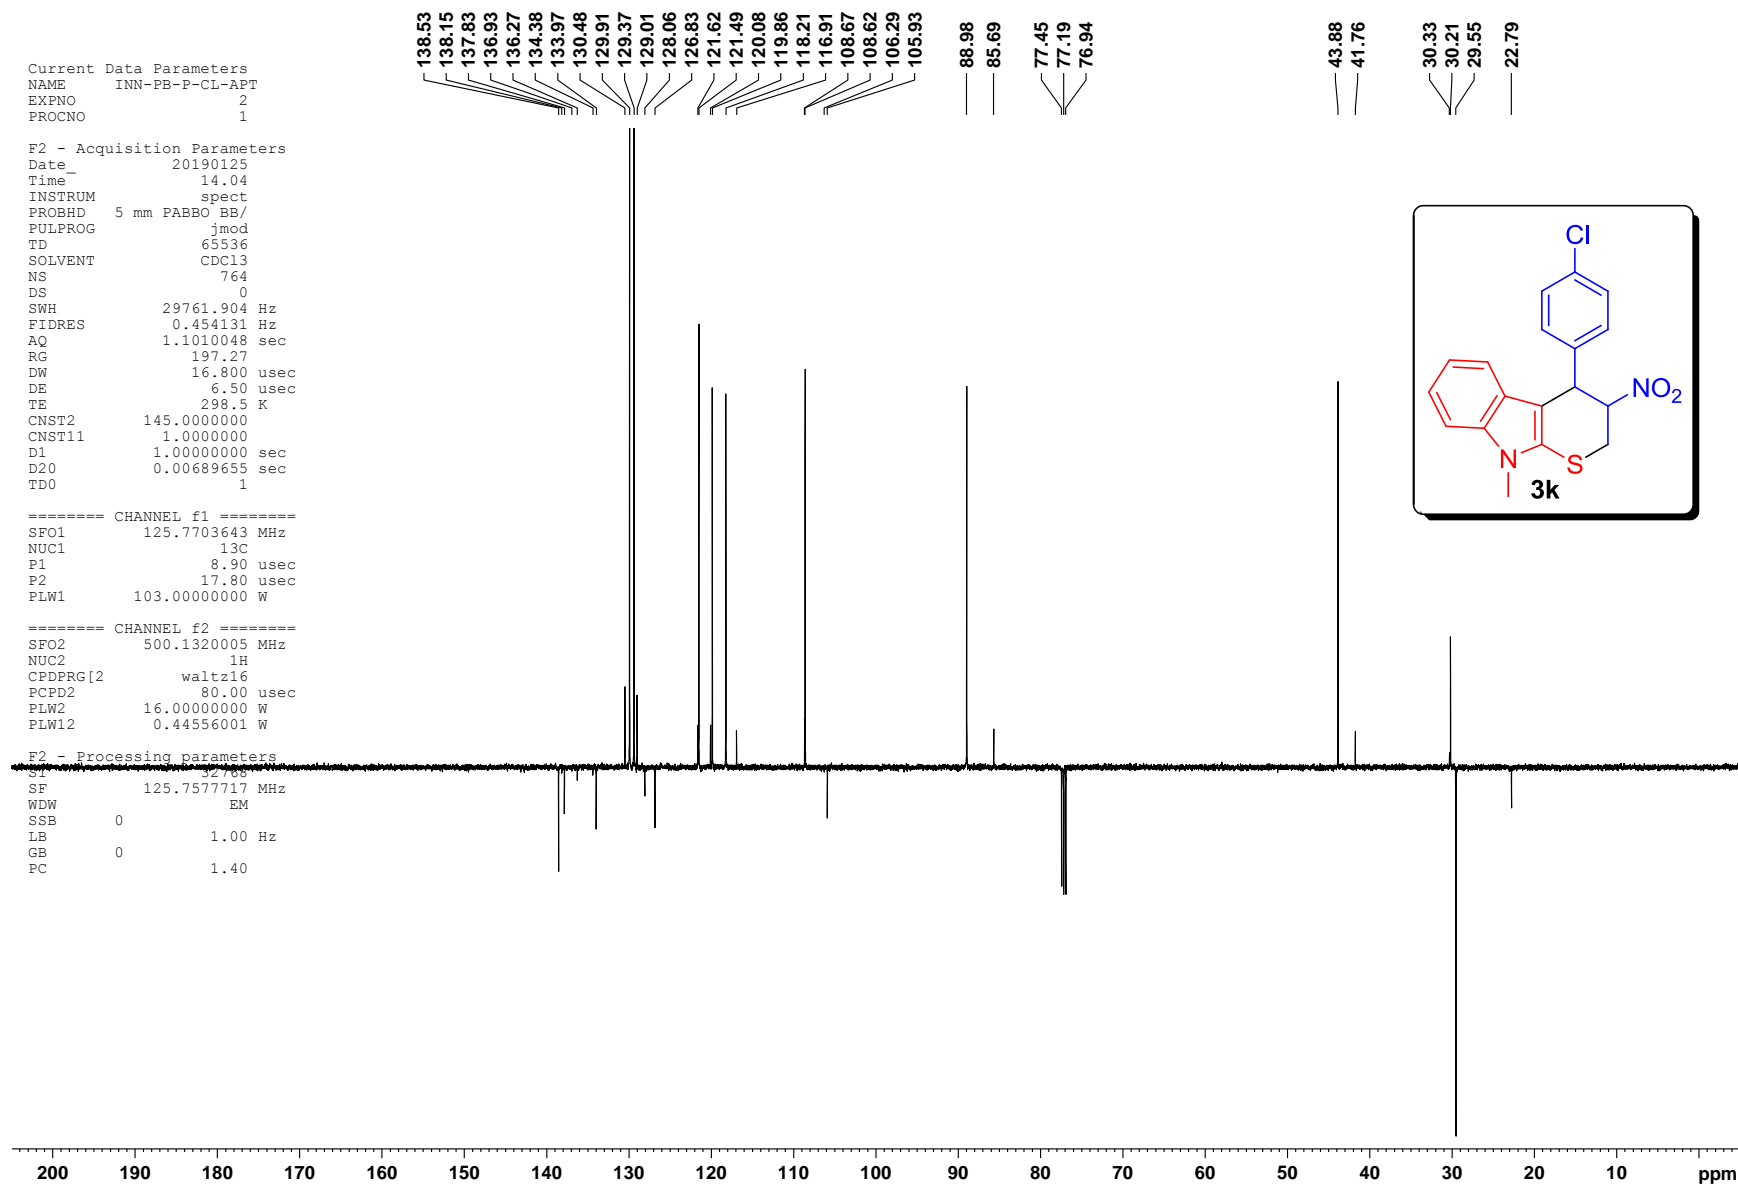Figure S37.  $^{13}\text{C}$ -APT NMR Spectrum of 3k (major + minor, dr 90:10)



Current Data Parameters  
 NAME INN-PB-CH-63-1H  
 EXPNO 1  
 PROCNO 1

F2 - Acquisition Parameters  
 Date\_ 20170215  
 Time\_ 17.24  
 INSTRUM spect  
 PROBHD 5 mm PABBO BB-  
 PULPROG zg30  
 TD 54274  
 SOLVENT CDCl3  
 NS 5  
 DS 0  
 SWH 8223.685 Hz  
 FIDRES 0.151522 Hz  
 AQ 3.2998593 sec  
 RG 128  
 DW 60.800 usec  
 DE 6.50 usec  
 TE 297.1 K  
 D1 1.0000000 sec  
 TD0 1

==== CHANNEL f1 =====  
 NUC1 1H  
 P1 14.75 usec  
 PL1 -1.00 dB  
 PL1W 10.56200695 W  
 SFO1 400.1324710 MHz

F2 - Processing parameters  
 SI 32768  
 SF 400.1300101 MHz  
 WDW EM  
 SSB 0  
 LB 0.30 Hz  
 GB 0  
 PC 1.00

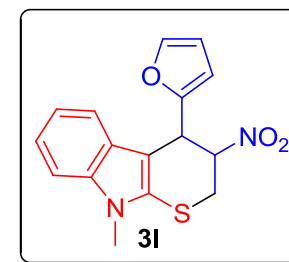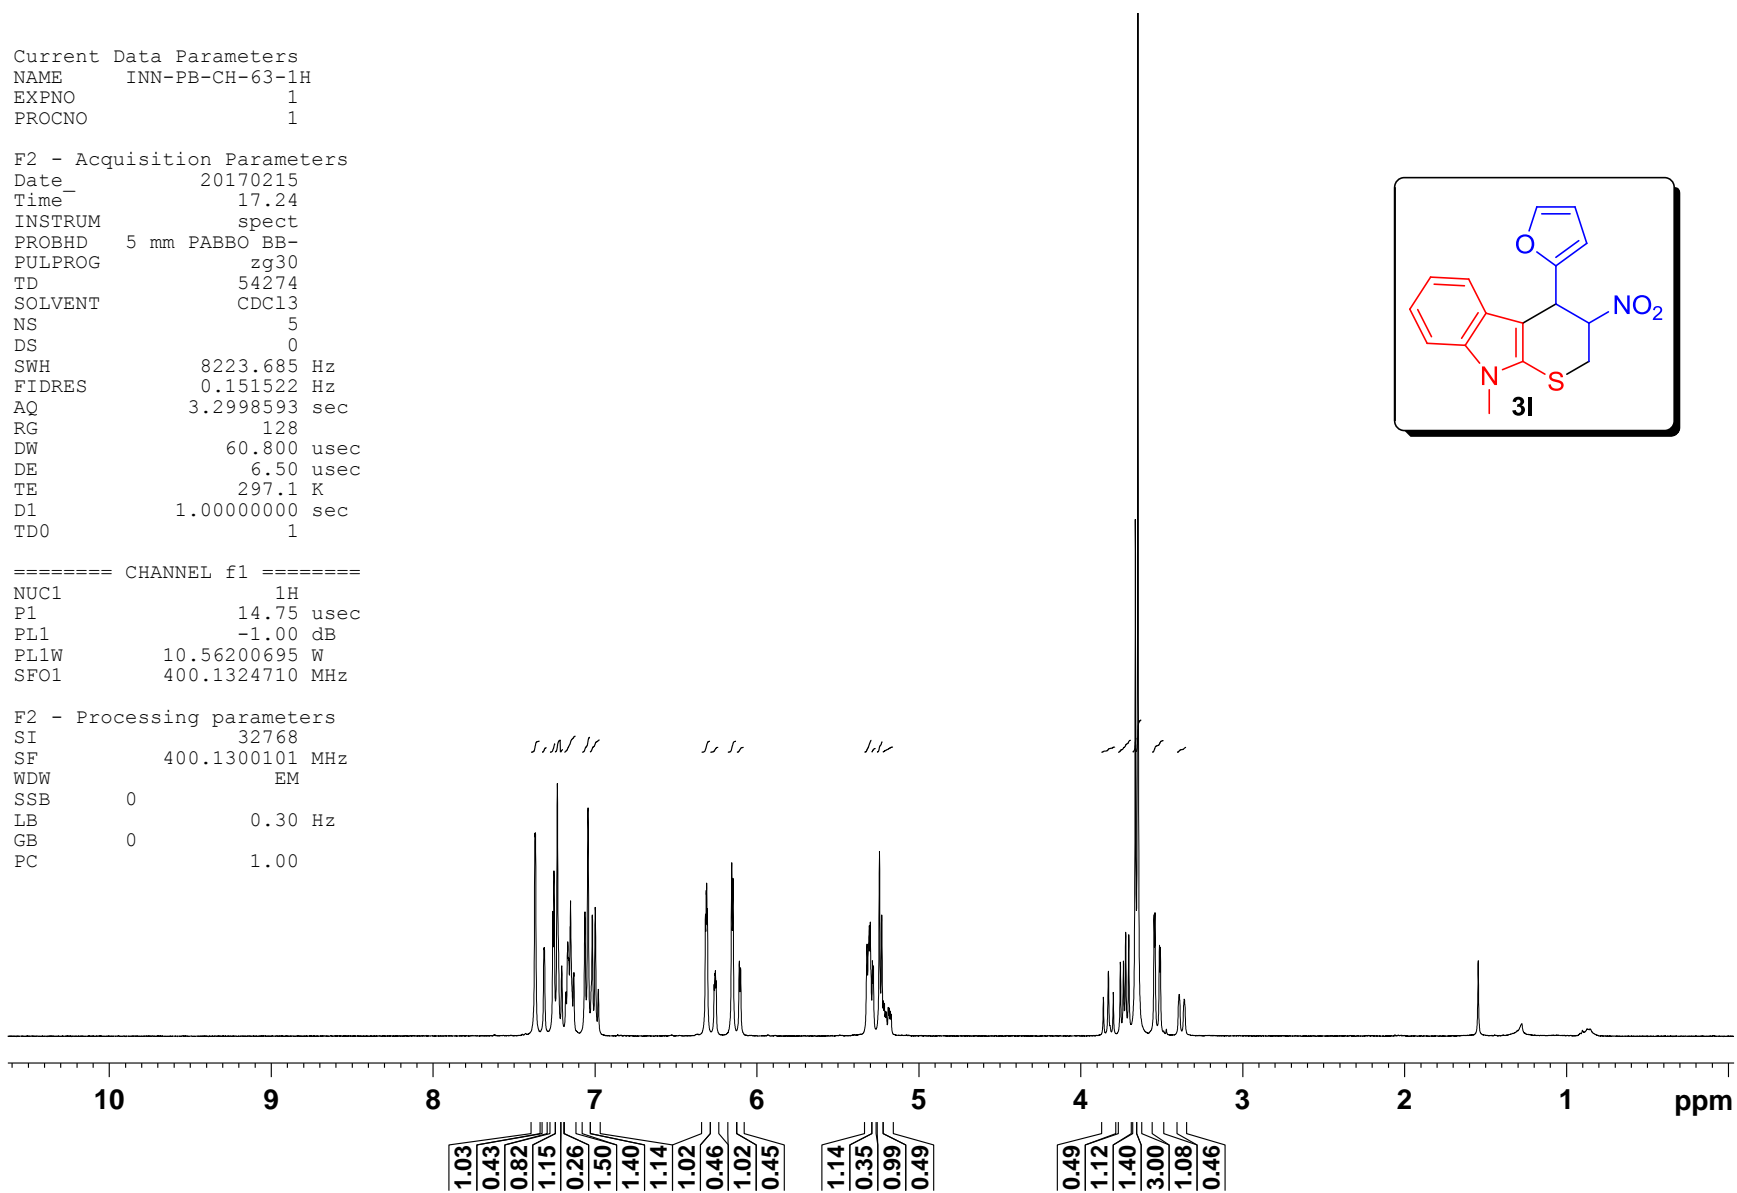

Figure S38. <sup>1</sup>H NMR Spectrum of 3l (major + minor, dr 70:30)

Current Data Parameters  
 NAME INN-PB-CH-63-13C  
 EXPNO 5  
 PROCNO 1

F2 - Acquisition Parameters  
 Date\_ 20170216  
 Time\_ 3.10  
 INSTRUM spect  
 PROBHD 5 mm PABBO BB-  
 PULPROG zgpg30  
 TD 65536  
 SOLVENT CDCl3  
 NS 13396  
 DS 4  
 SWH 26041.666 Hz  
 FIDRES 0.397364 Hz  
 AQ 1.2582912 sec  
 RG 2050  
 DW 19.200 usec  
 DE 6.50 usec  
 TE 297.1 K  
 D1 1.00000000 sec  
 D11 0.03000000 sec  
 TDO 1

==== CHANNEL f1 =====  
 NUC1 13C  
 P1 8.50 usec  
 PL1 -2.00 dB  
 PL1W 56.53121948 W  
 SFO1 100.6238364 MHz

==== CHANNEL f2 =====  
 CPDPRG[2] waltz16  
 NUC2 1H  
 PCPD2 80.00 usec  
 PL2 -1.00 dB  
 PL12 13.69 dB  
 PL13 14.50 dB  
 PL2W 10.56200695 W  
 PL12W 0.35871249 W  
 PL13W 0.29767781 W  
 SFO2 400.1316005 MHz

F2 - Processing parameters  
 SI 32768  
 SF 100.6127533 MHz  
 WDW EM  
 SSB 0  
 LB 1.00 Hz  
 GB 0  
 PC 1.40

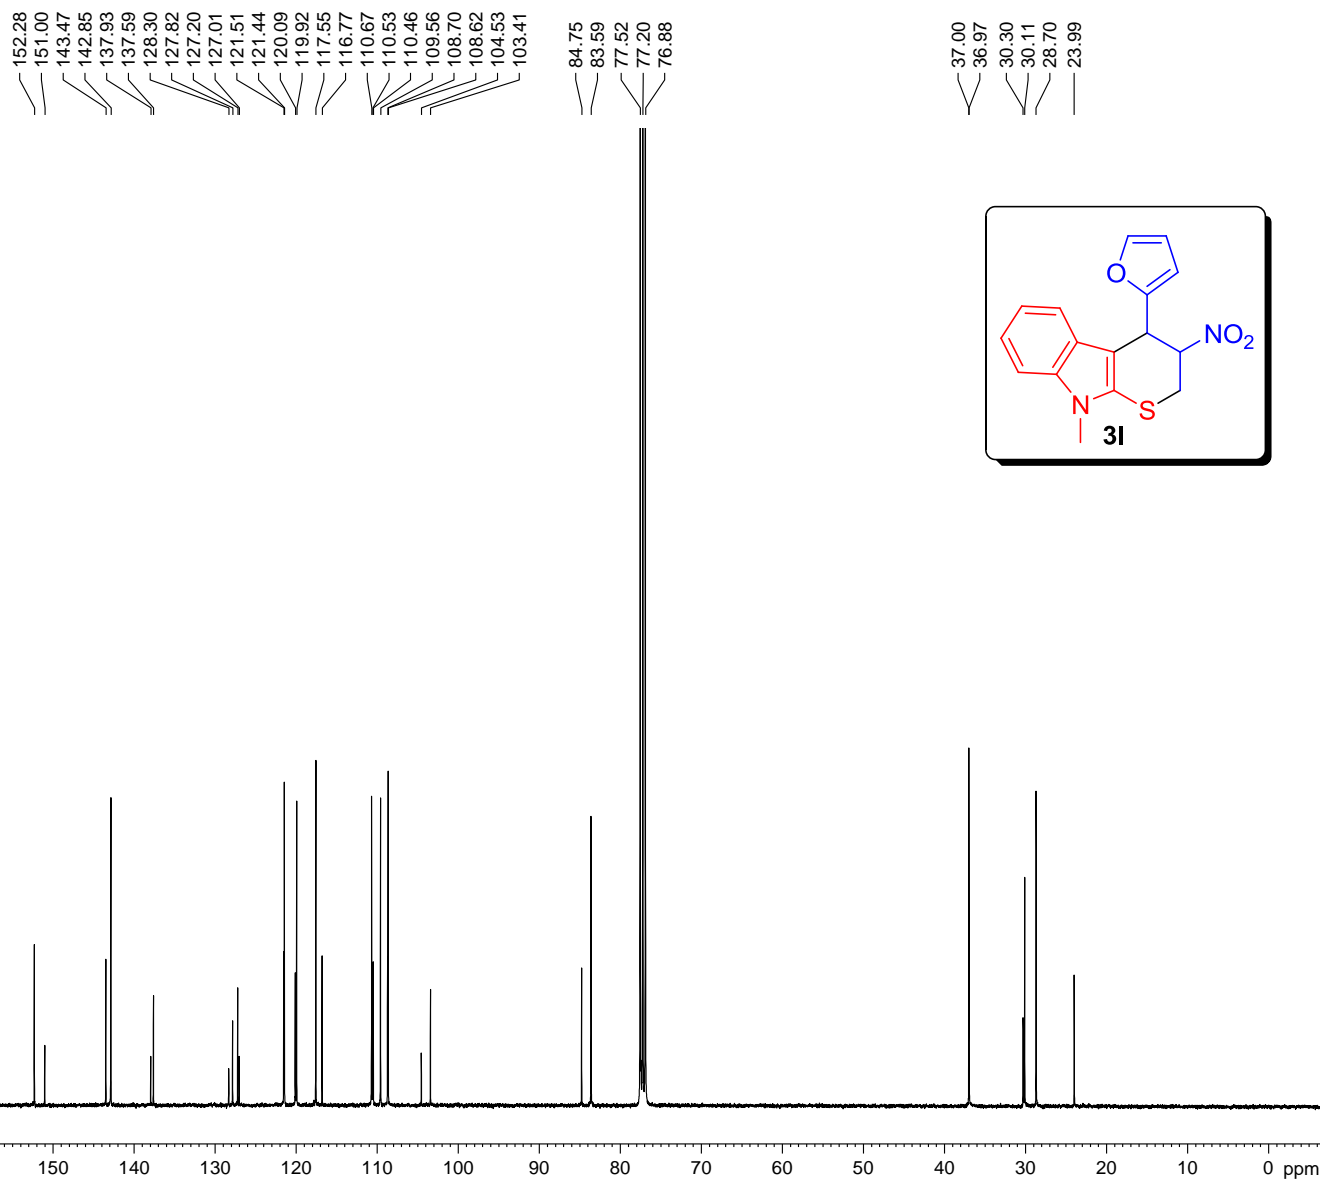

Figure S39.  $^{13}\text{C}$  NMR Spectrum of 3I (major + minor, dr 70:30)

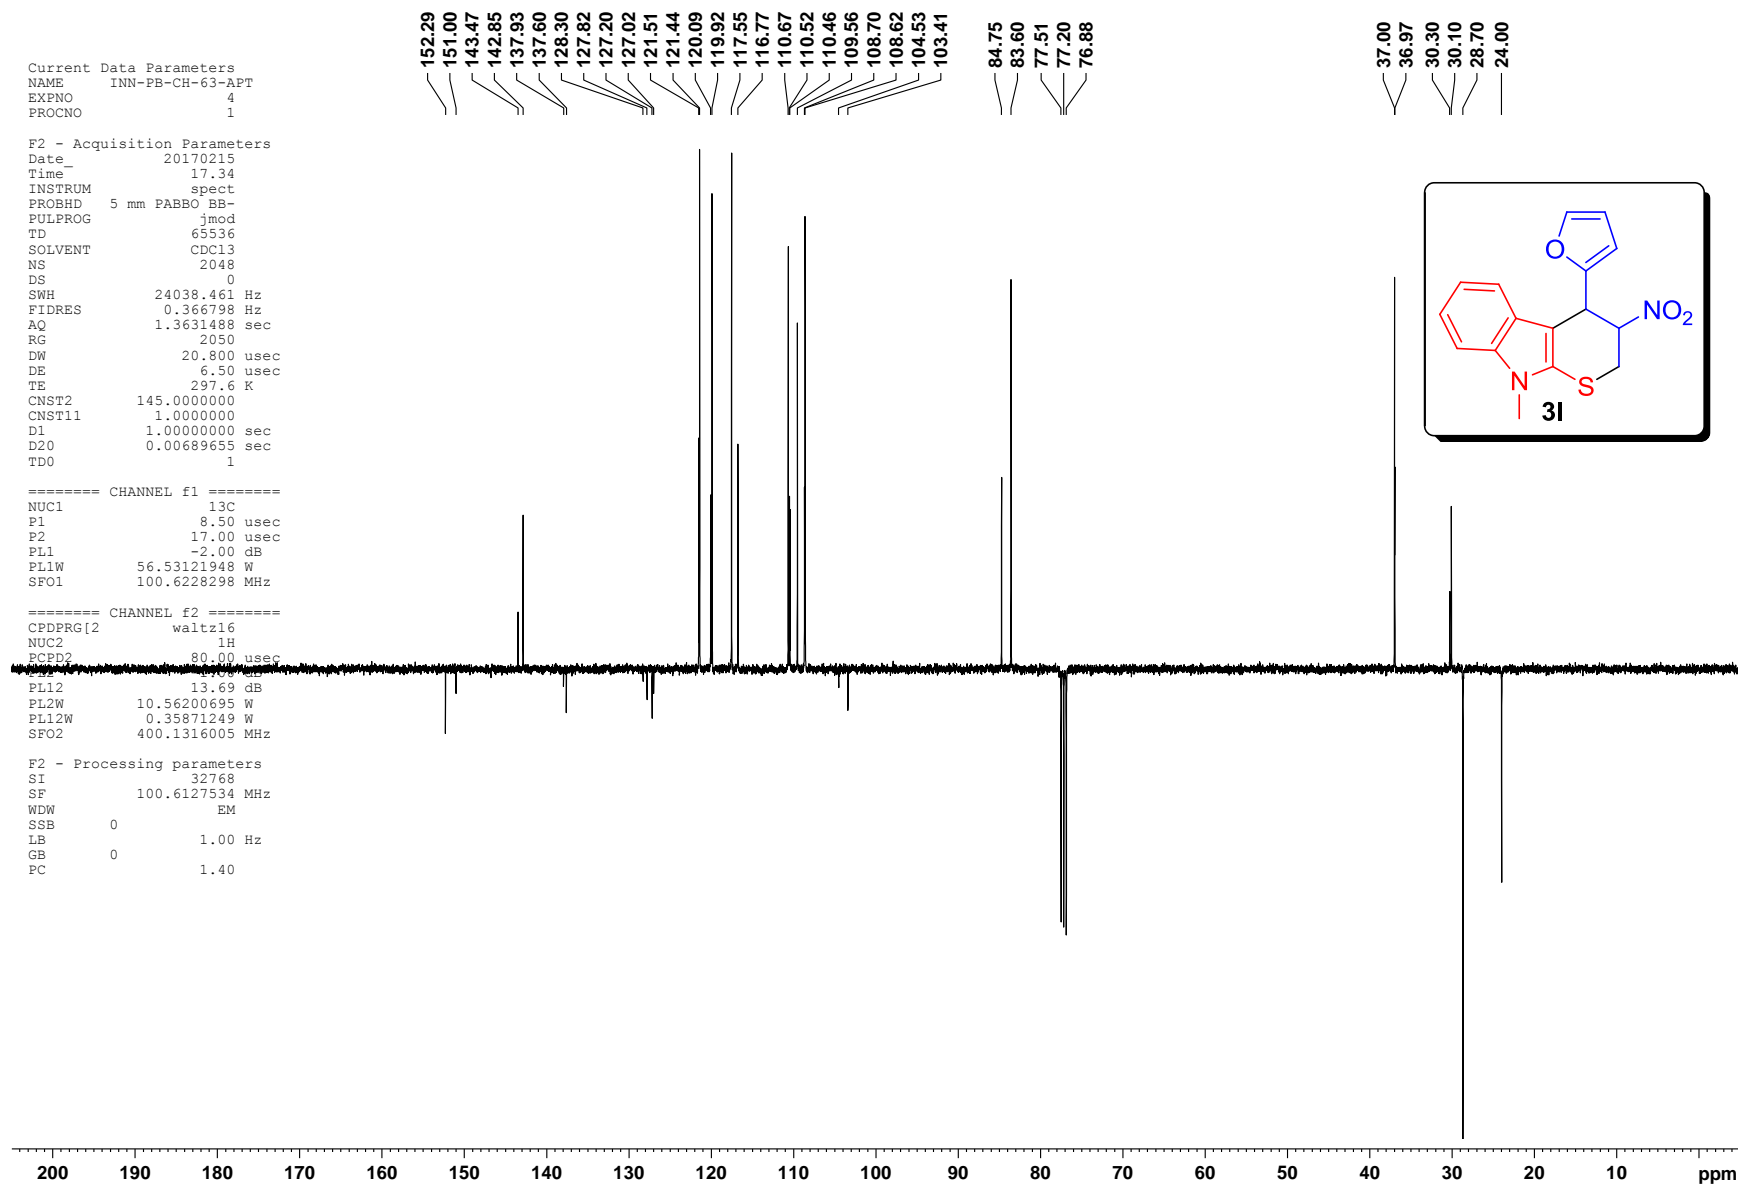Figure S40.  $^{13}\text{C}$ -APT NMR Spectrum of 3l (major + minor, dr 70:30)

Current Data Parameters  
 NAME INN-PB-CH-62-1H  
 EXPNO 5  
 PROCNO 1

F2 - Acquisition Parameters  
 Date\_ 20170129  
 Time\_ 20.51  
 INSTRUM spect  
 PROBHD 5 mm PABBO BB/  
 PULPROG zg30  
 TD 65536  
 SOLVENT CDC13  
 NS 6  
 DS 2  
 SWH 10000.000 Hz  
 FIDRES 0.152588 Hz  
 AQ 3.2767999 sec  
 RG 119.07  
 DW 50.000 usec  
 DE 6.50 usec  
 TE 296.9 K  
 D1 1.00000000 sec  
 TD0 1

==== CHANNEL f1 =====  
 SFO1 500.1330885 MHz  
 NUC1 1H  
 P1 13.00 usec  
 PLW1 13.00000000 W

F2 - Processing parameters  
 SI 65536  
 SF 500.1300136 MHz  
 WDW EM  
 SSB 0  
 LB 0.30 Hz  
 GB 0  
 PC 1.00

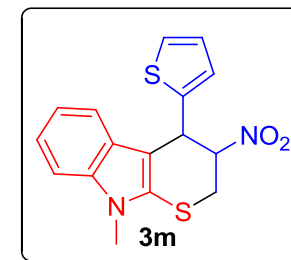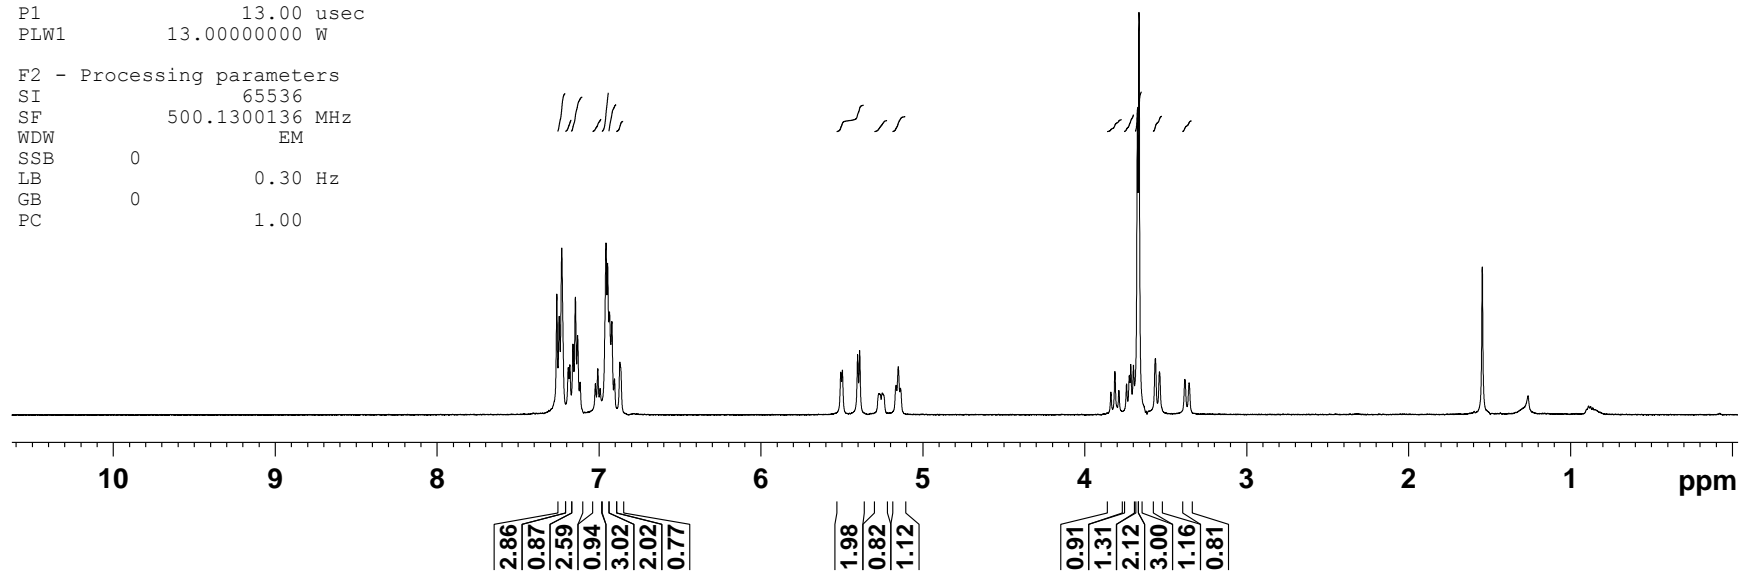

Figure S41. <sup>1</sup>H NMR Spectrum of 3m (major + minor, dr 60:40)

Current Data Parameters  
 NAME INN-PB-CH-62-13C  
 EXPNO 2  
 PROCNO 1

F2 - Acquisition Parameters  
 Date\_ 20170129  
 Time 16.07  
 INSTRUM spect  
 PROBHD 5 mm PABBO BB/  
 PULPROG zgpg30  
 TD 65536  
 SOLVENT CDCl3  
 NS 2503  
 DS 0  
 SWH 29761.904 Hz  
 FIDRES 0.454131 Hz  
 AQ 1.1010048 sec  
 RG 197.27  
 DW 16.800 usec  
 DE 6.50 usec  
 TE 298.0 K  
 D1 1.00000000 sec  
 D11 0.03000000 sec  
 TD0 1

==== CHANNEL f1 =====  
 SFO1 125.7703637 MHz  
 NUC1 13C  
 P1 8.90 usec  
 PLW1 103.00000000 W

==== CHANNEL f2 =====  
 SFO2 500.1320005 MHz  
 NUC2 1H  
 CPDPRG[2] waltz16  
 PCPD2 80.00 usec  
 PLW2 13.00000000 W  
 PLW12 0.34327999 W  
 PLW13 0.17267001 W

F2 - Processing parameters  
 SI 32768  
 SF 125.7577731 MHz  
 WDW EM  
 SSB 0  
 LB 1.00 Hz  
 GB 0  
 PC 1.40

143.91  
 141.48  
 138.01  
 137.66  
 127.99  
 127.65  
 127.34  
 127.15  
 127.11  
 127.03  
 126.97  
 126.38  
 125.73  
 121.58  
 121.46  
 120.14  
 119.88  
 117.98  
 116.88  
 108.67  
 108.59  
 107.33  
 105.98  
 87.84  
 85.81  
 77.45  
 77.20  
 76.94  
 38.76  
 37.87  
 30.31  
 30.14  
 28.95  
 23.13

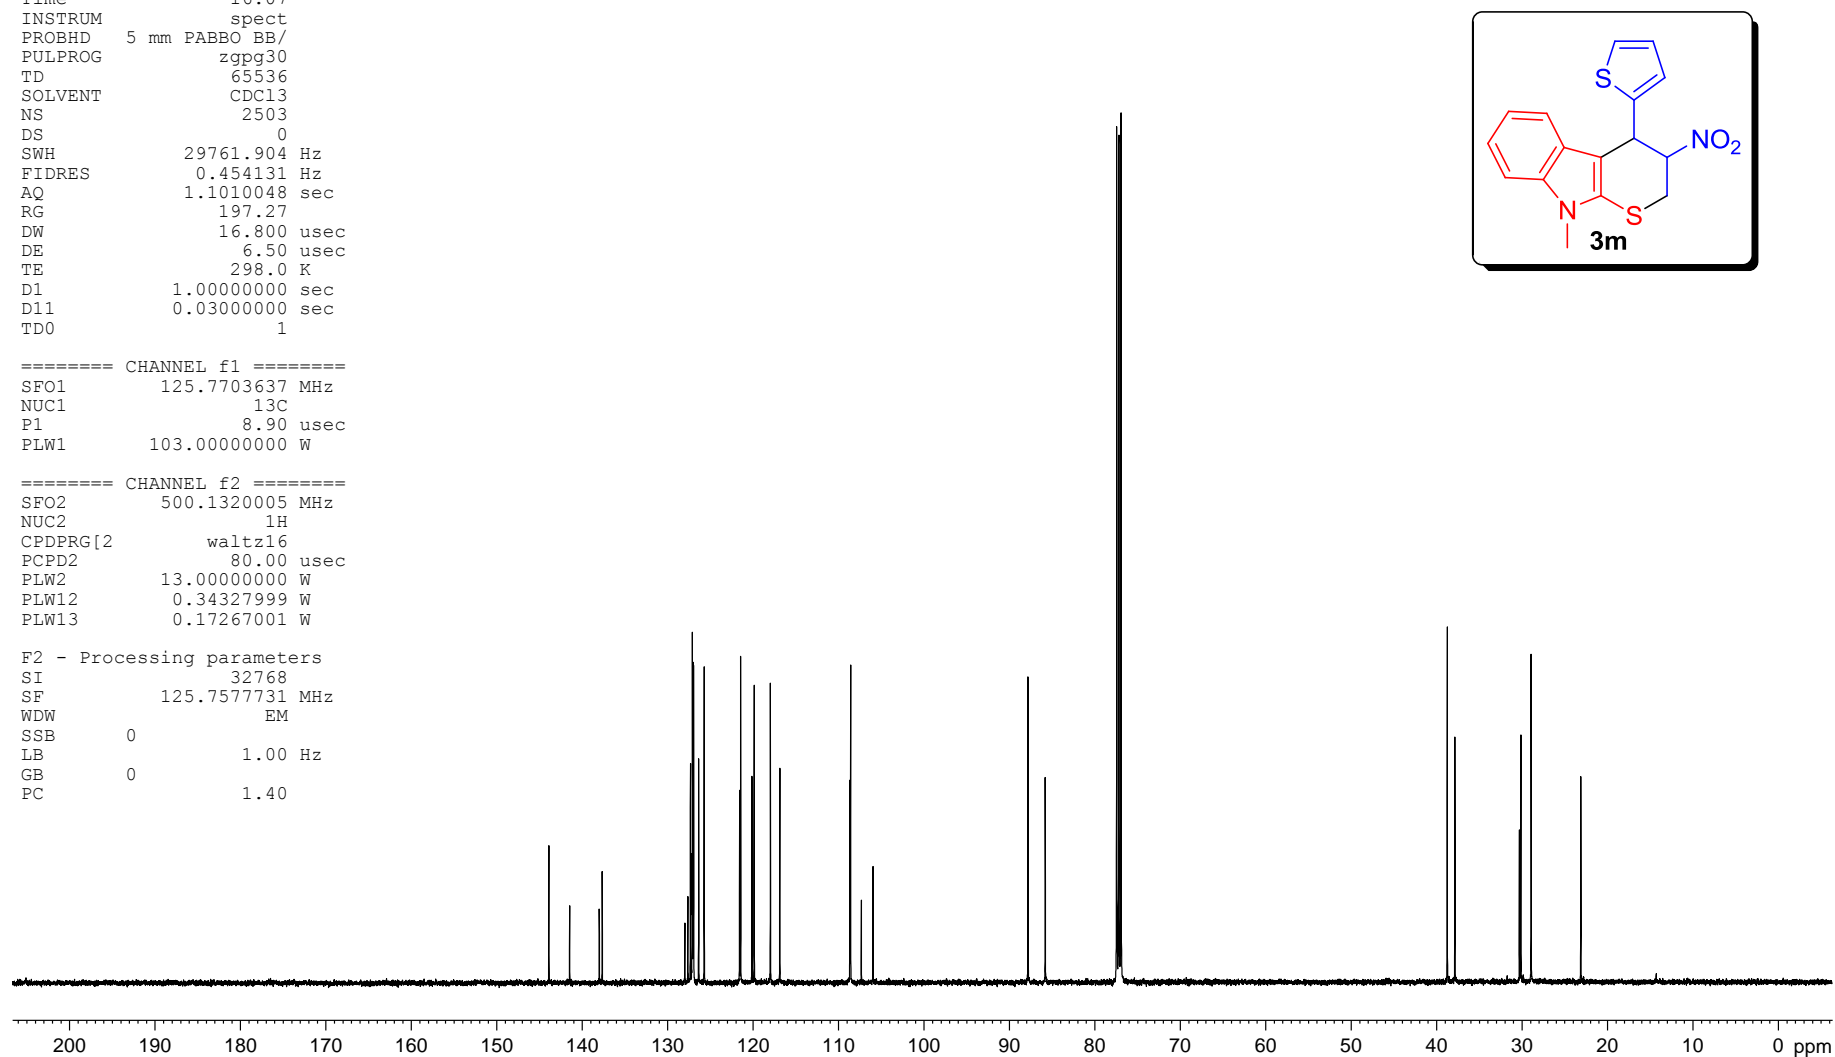

Figure S42. <sup>13</sup>C NMR Spectrum of 3m (major + minor, dr 60:40)

Current Data Parameters  
 NAME INN-PB-CH-62-APT  
 EXPNO 3  
 PROCNO 1

## F2 - Acquisition Parameters

Date\_ 20170129  
 Time 14.49  
 INSTRUM spect  
 PROBHD 5 mm PABBO BB/  
 PULPROG jmod  
 TD 65536  
 SOLVENT CDC13  
 NS 512  
 DS 0  
 SWH 29761.904 Hz  
 FIDRES 0.454131 Hz  
 AQ 1.1010048 sec  
 RG 197.27  
 DW 16.800 usec  
 DE 6.50 usec  
 TE 298.1 K  
 CNST2 145.0000000  
 CNST11 1.0000000  
 D1 1.0000000 sec  
 D20 0.00689655 sec  
 TD0 1

==== CHANNEL f1 =====  
 SFO1 125.7703643 MHz  
 NUC1 13C  
 P1 8.90 usec  
 P2 17.80 usec  
 PLW1 103.00000000 W

==== CHANNEL f2 =====  
 SFO2 500.1320005 MHz  
 NUC2 1H  
 CPDPRG[2] waltz16  
 PCPD2 80.00 usec  
 PLW2 13.00000000 W  
 PLW12 0.34327999 W

F2 - Processing parameters  
 SI 32768  
 SF 125.7577729 MHz  
 WDW EM  
 SSB 0  
 LB 1.00 Hz  
 GB 0  
 PC 1.40

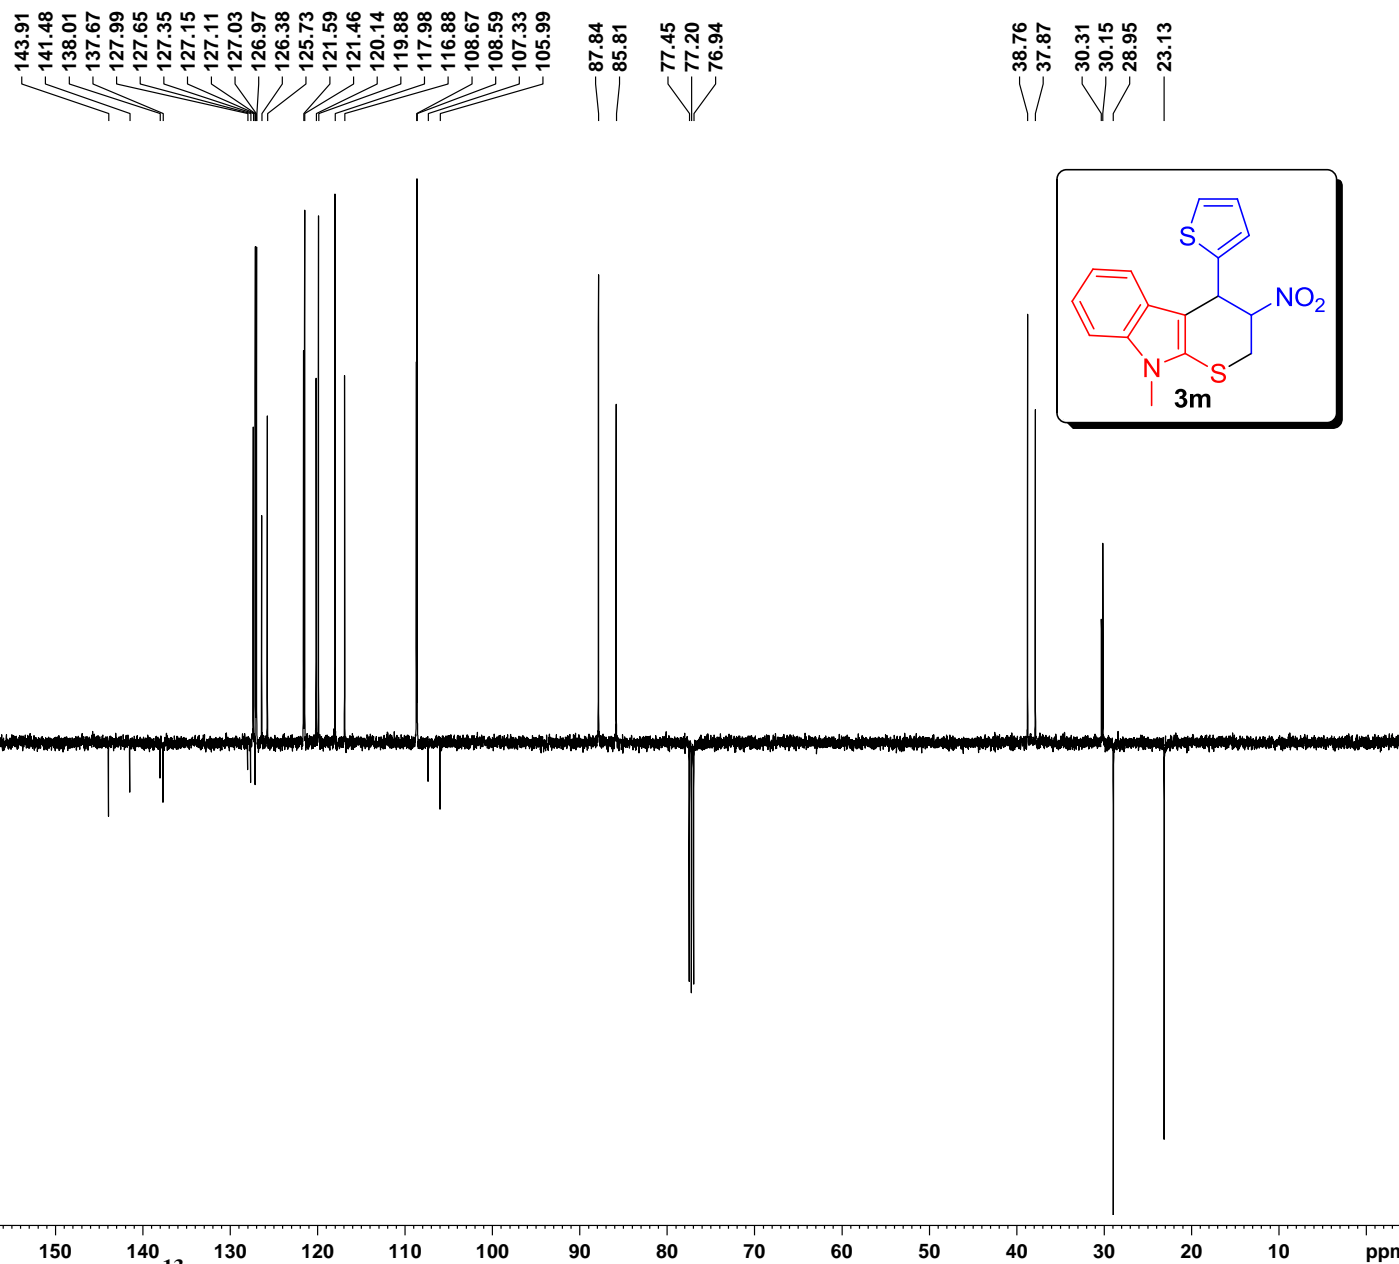

Figure S43. <sup>13</sup>C-APT NMR Spectrum of 3m (major + minor, dr 60:40)

Current Data Parameters  
 NAME INN-PB-74-1H  
 EXPNO 12  
 PROCNO 1

F2 - Acquisition Parameters  
 Date\_ 20170220  
 Time\_ 17.34  
 INSTRUM spect  
 PROBHD 5 mm PABBO BB-  
 PULPROG zg30  
 TD 54274  
 SOLVENT CDCl3  
 NS 16  
 DS 0  
 SWH 8223.685 Hz  
 FIDRES 0.151522 Hz  
 AQ 3.2998593 sec  
 RG 90.5  
 DW 60.800 usec  
 DE 6.50 usec  
 TE 298.0 K  
 D1 1.00000000 sec  
 TD0 1

==== CHANNEL f1 =====  
 NUC1 1H  
 P1 14.75 usec  
 PL1 -1.00 dB  
 PL1W 10.56200695 W  
 SFO1 400.1324710 MHz

F2 - Processing parameters  
 SI 32768  
 SF 400.1300094 MHz  
 WDW EM  
 SSB 0  
 LB 0.30 Hz  
 GB 0  
 PC 1.00

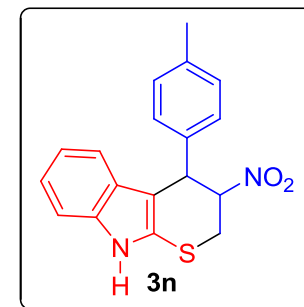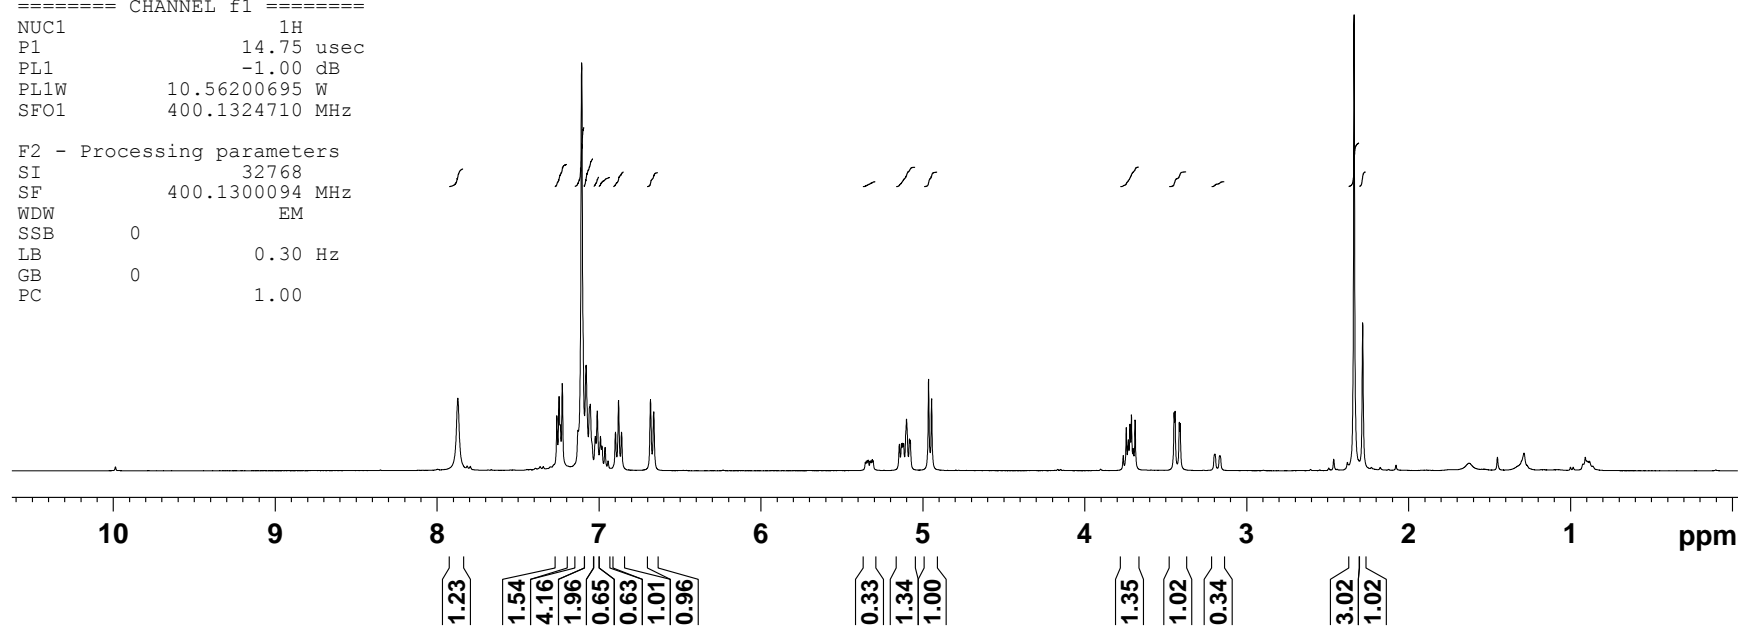

Figure S44. <sup>1</sup>H NMR Spectrum of 3n (major + minor, dr 77:23)

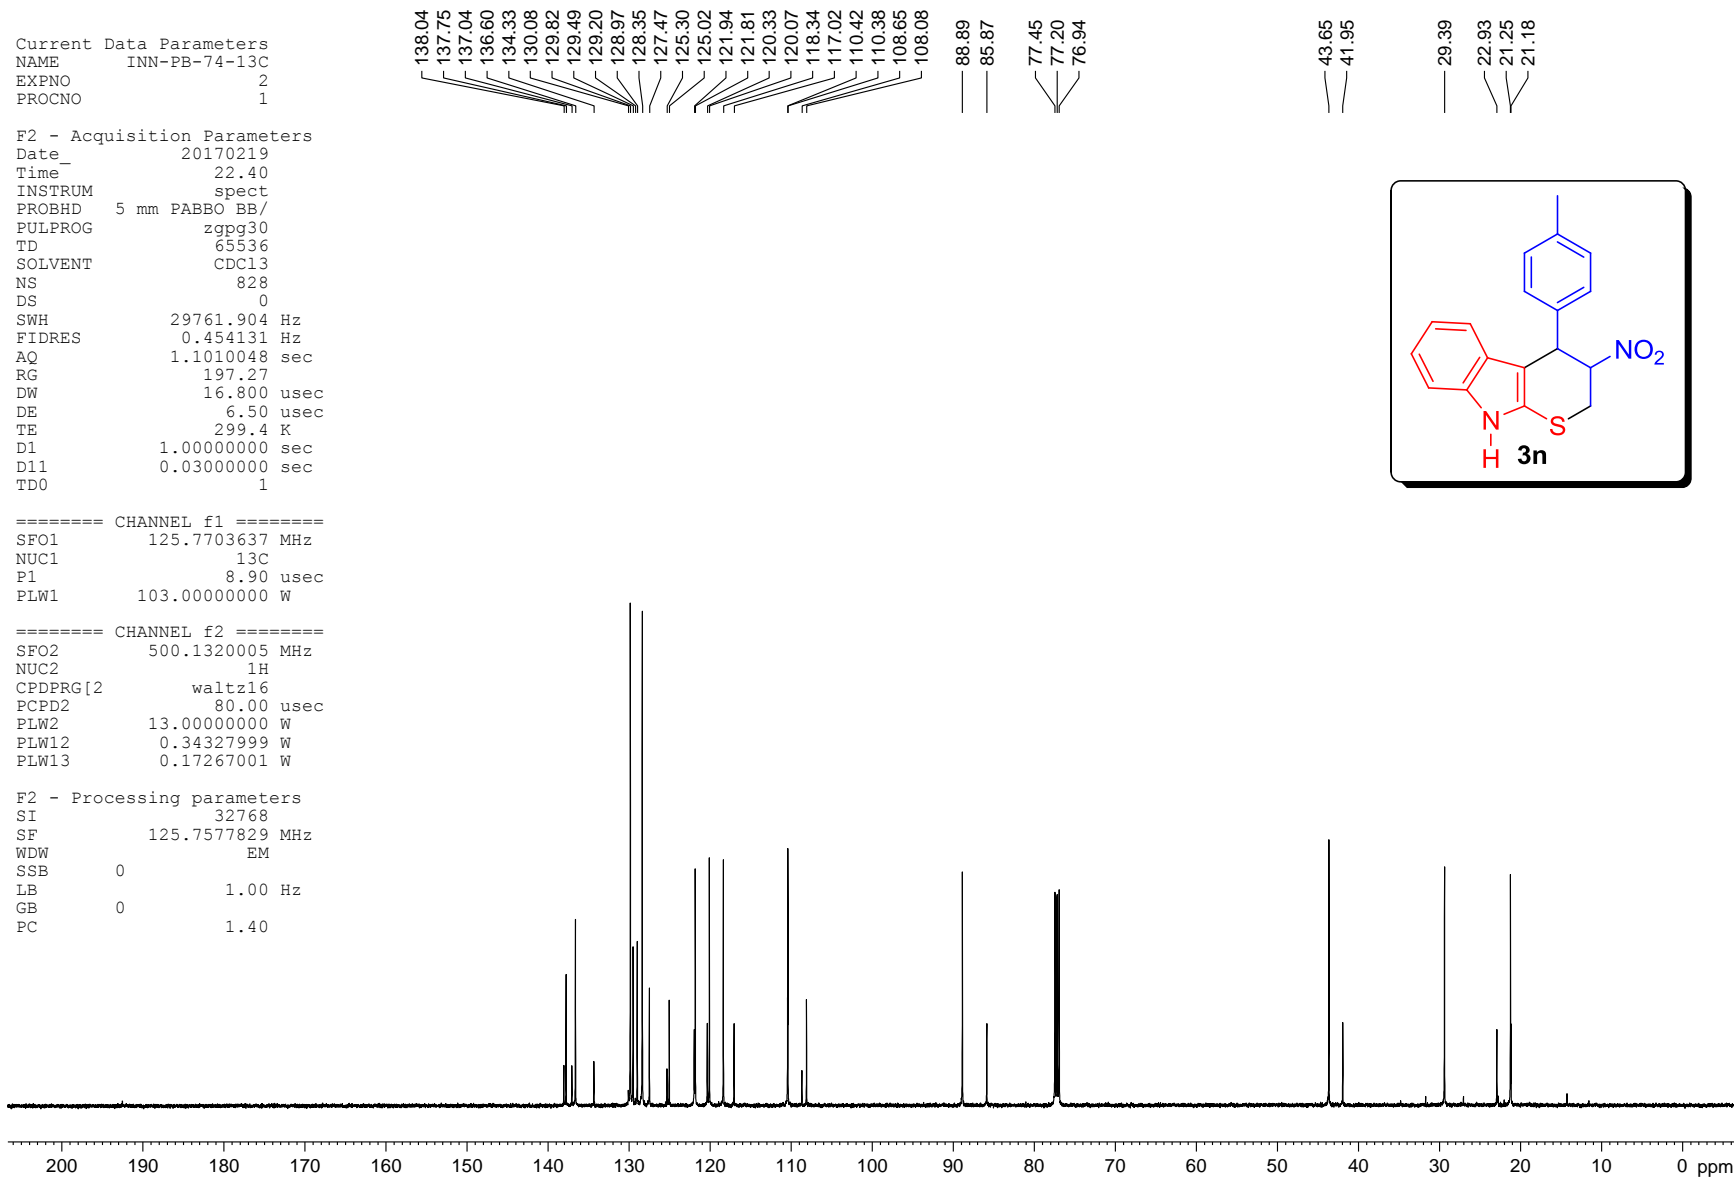



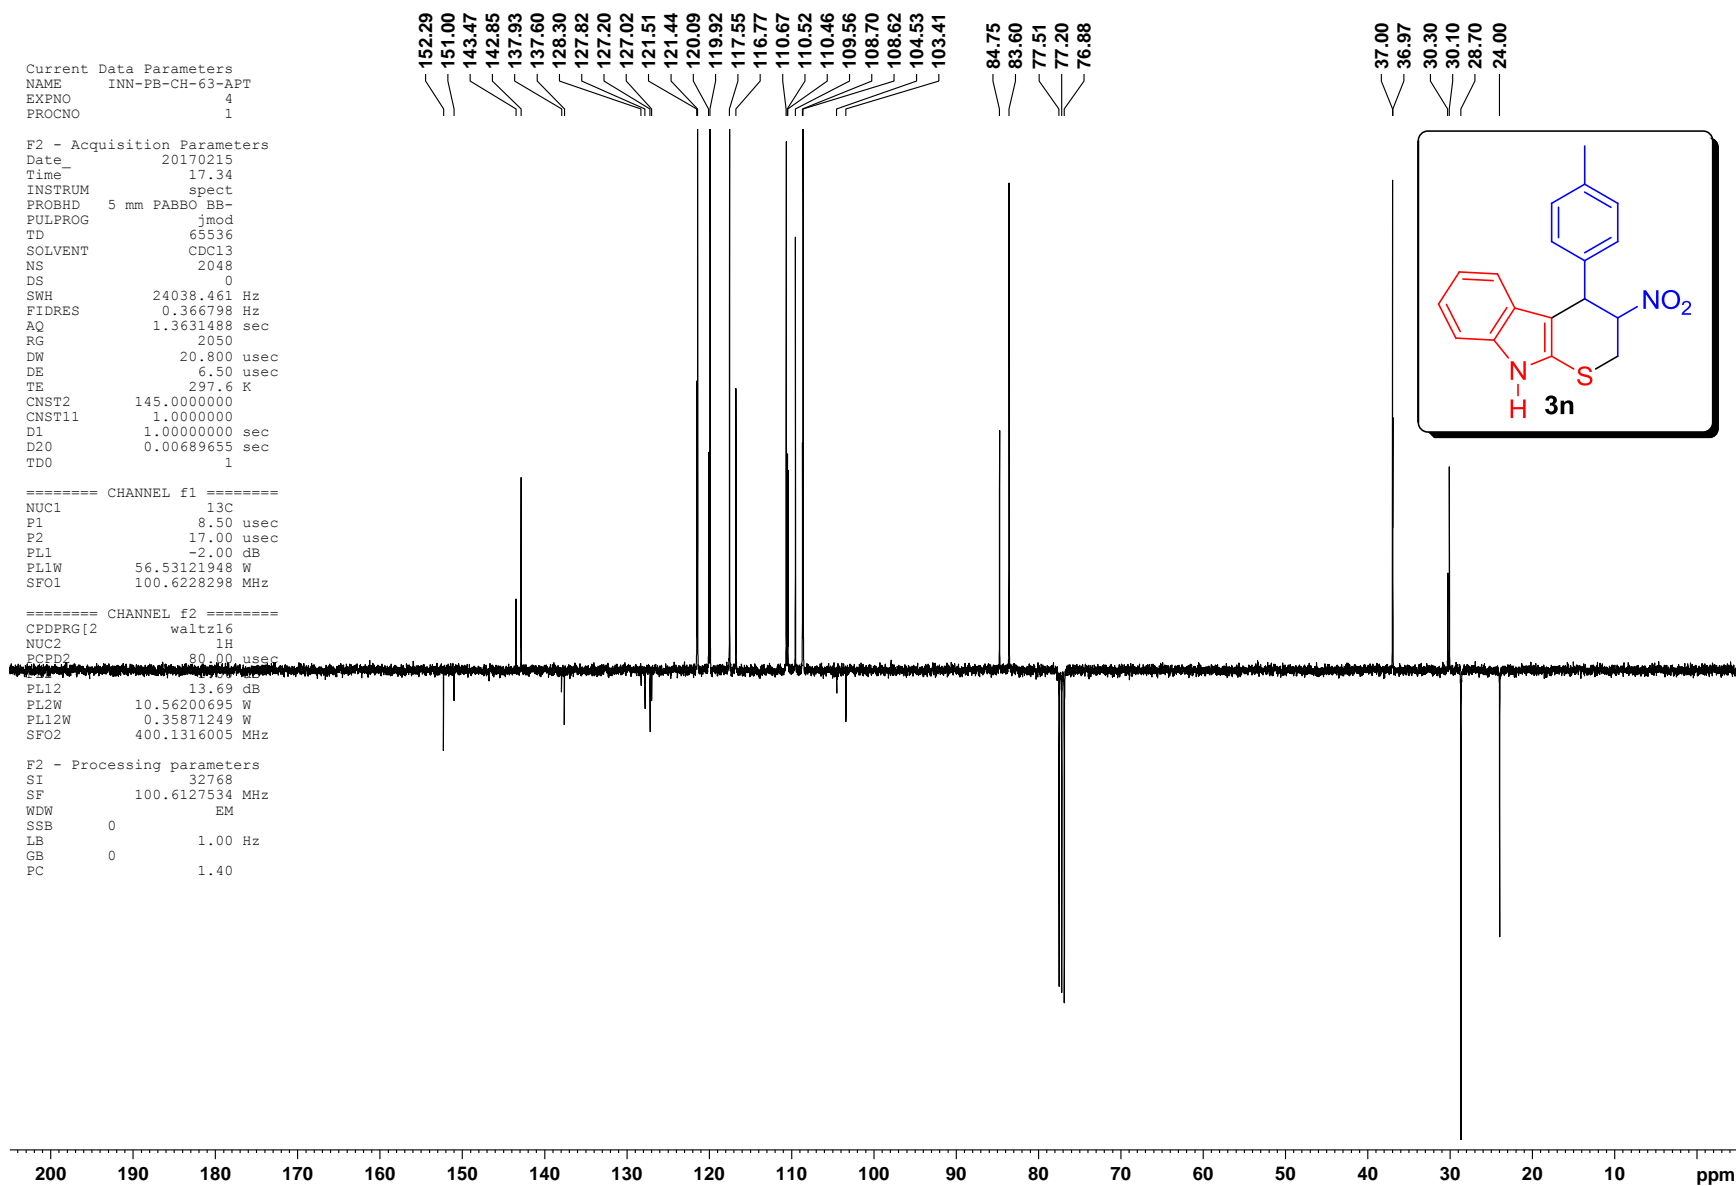Figure S46.  $^{13}\text{C}$ -APT NMR Spectrum of 3n (major + minor, dr 77:23)

Current Data Parameters  
 NAME INN-PB-73-1H  
 EXPNO 2  
 PROCNO 1

## F2 - Acquisition Parameters

Date\_ 20170129  
 Time\_ 22.33  
 INSTRUM spect  
 PROBHD 5 mm PABBO BB/  
 PULPROG zg30  
 TD 65536  
 SOLVENT CDC13  
 NS 6  
 DS 2  
 SWH 10000.000 Hz  
 FIDRES 0.152588 Hz  
 AQ 3.2767999 sec  
 RG 98.91  
 DW 50.000 usec  
 DE 6.50 usec  
 TE 296.8 K  
 D1 1.00000000 sec  
 TD0 1

==== CHANNEL f1 =====  
 SFO1 500.1330885 MHz  
 NUC1 1H  
 P1 13.00 usec  
 PLW1 13.00000000 W

F2 - Processing parameters  
 SI 65536  
 SF 500.1300129 MHz  
 WDW EM  
 SSB 0  
 LB 0.30 Hz  
 GB 0  
 PC 1.00

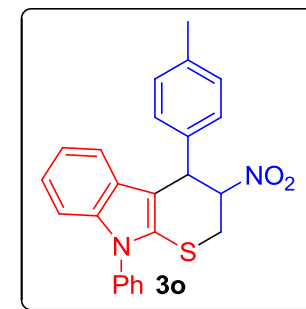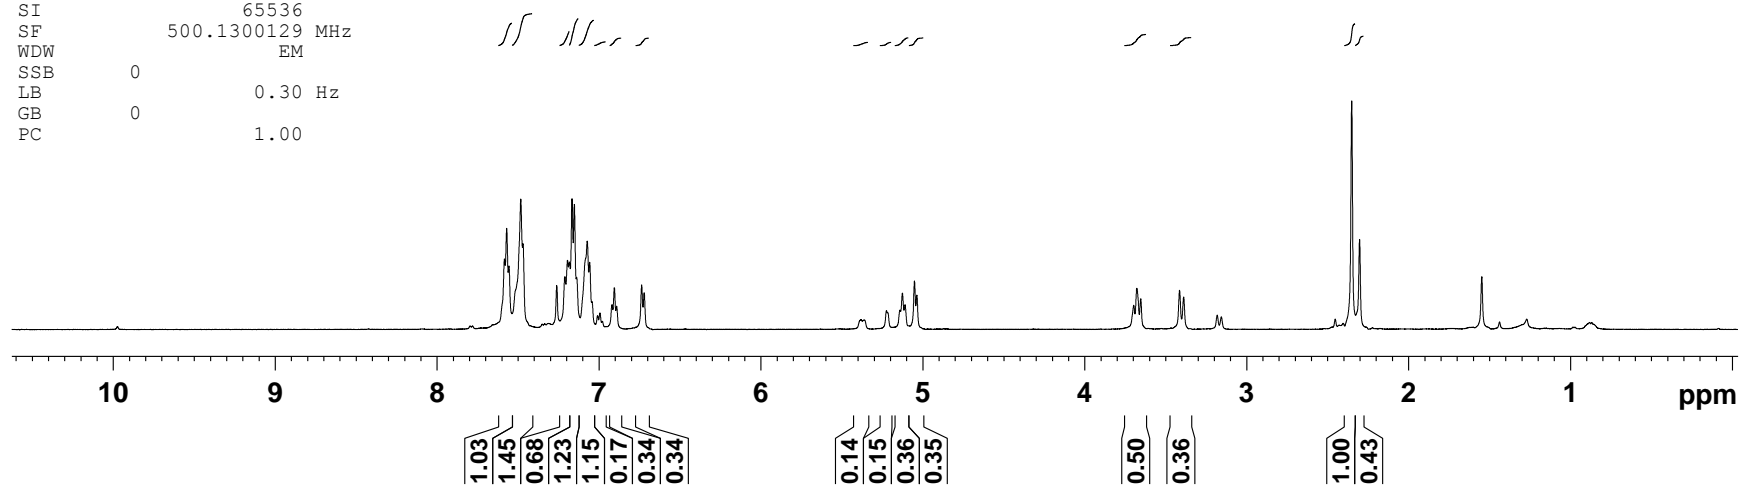

Figure S47. <sup>1</sup>H NMR Spectrum of 3o (major + minor, dr 75:25)

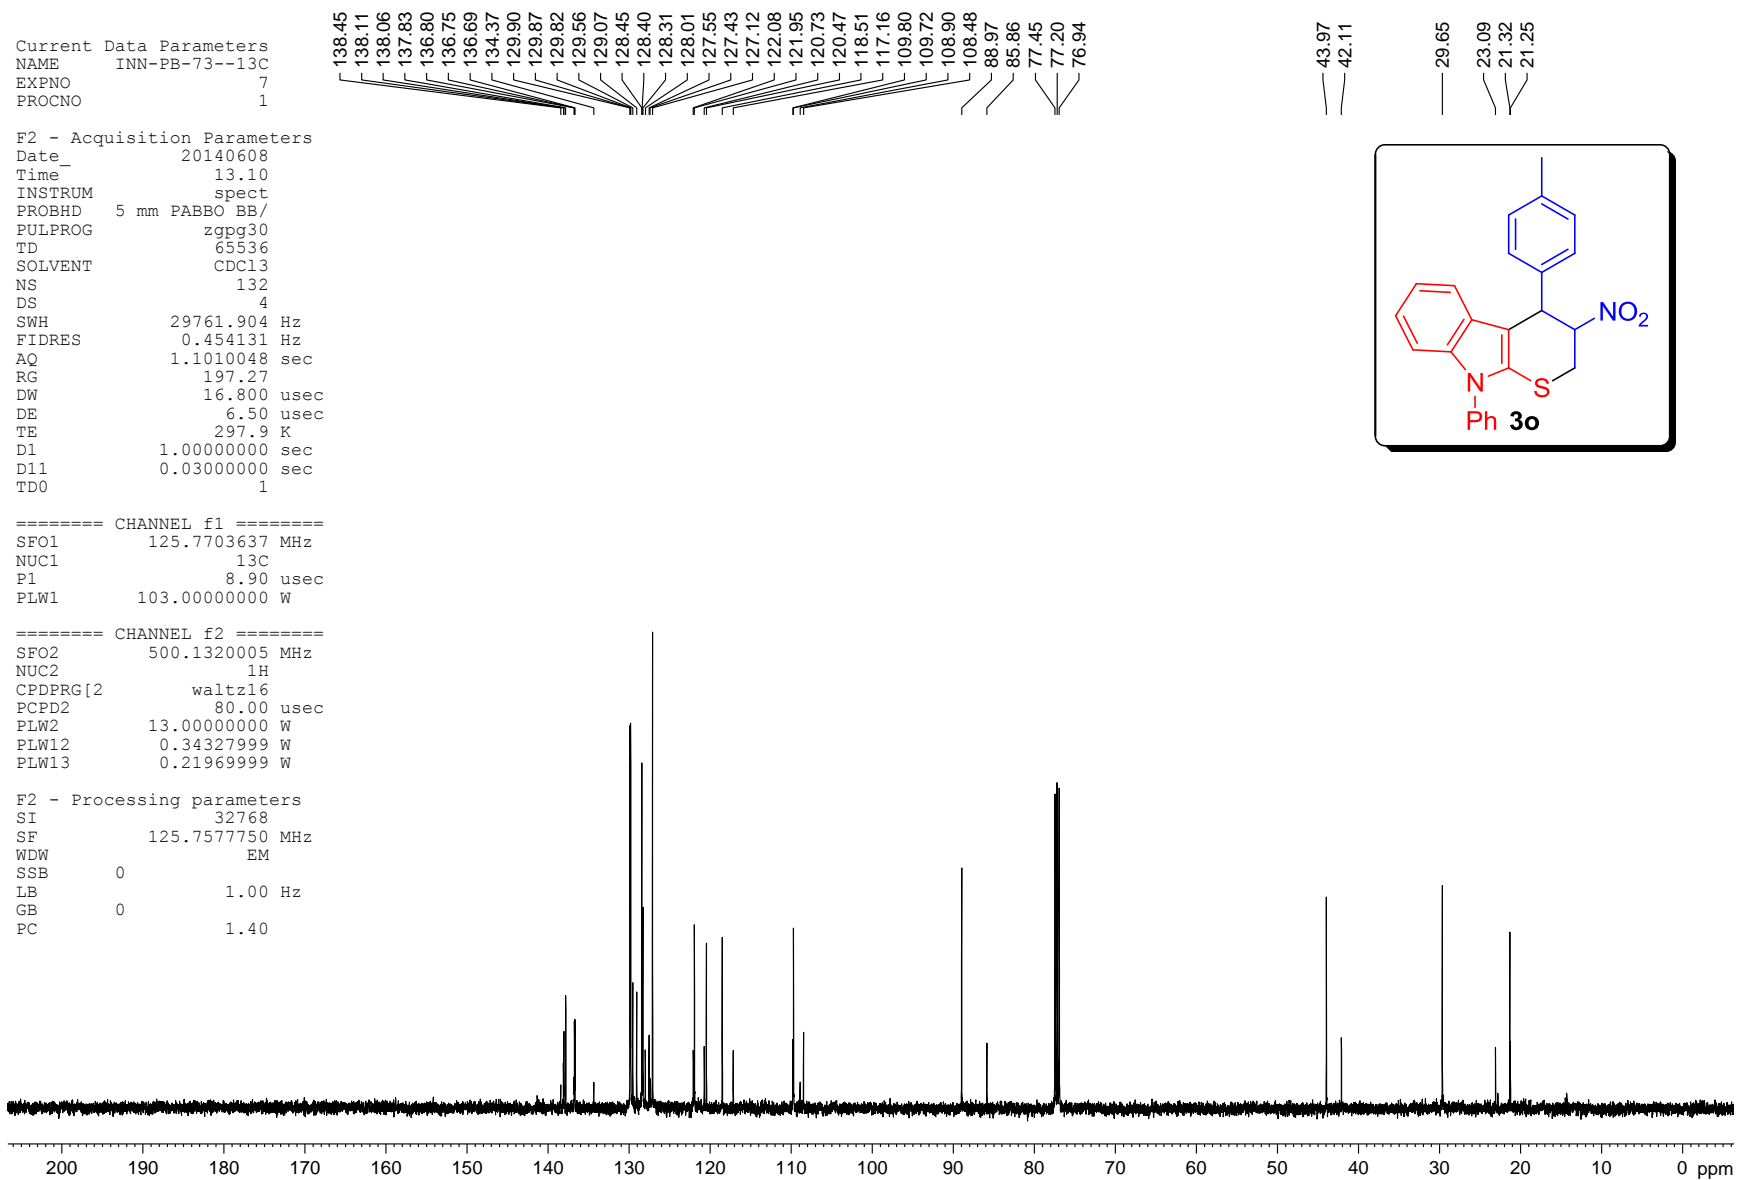Figure S48. <sup>13</sup>C NMR Spectrum of 3o (major + minor, dr 75:25)

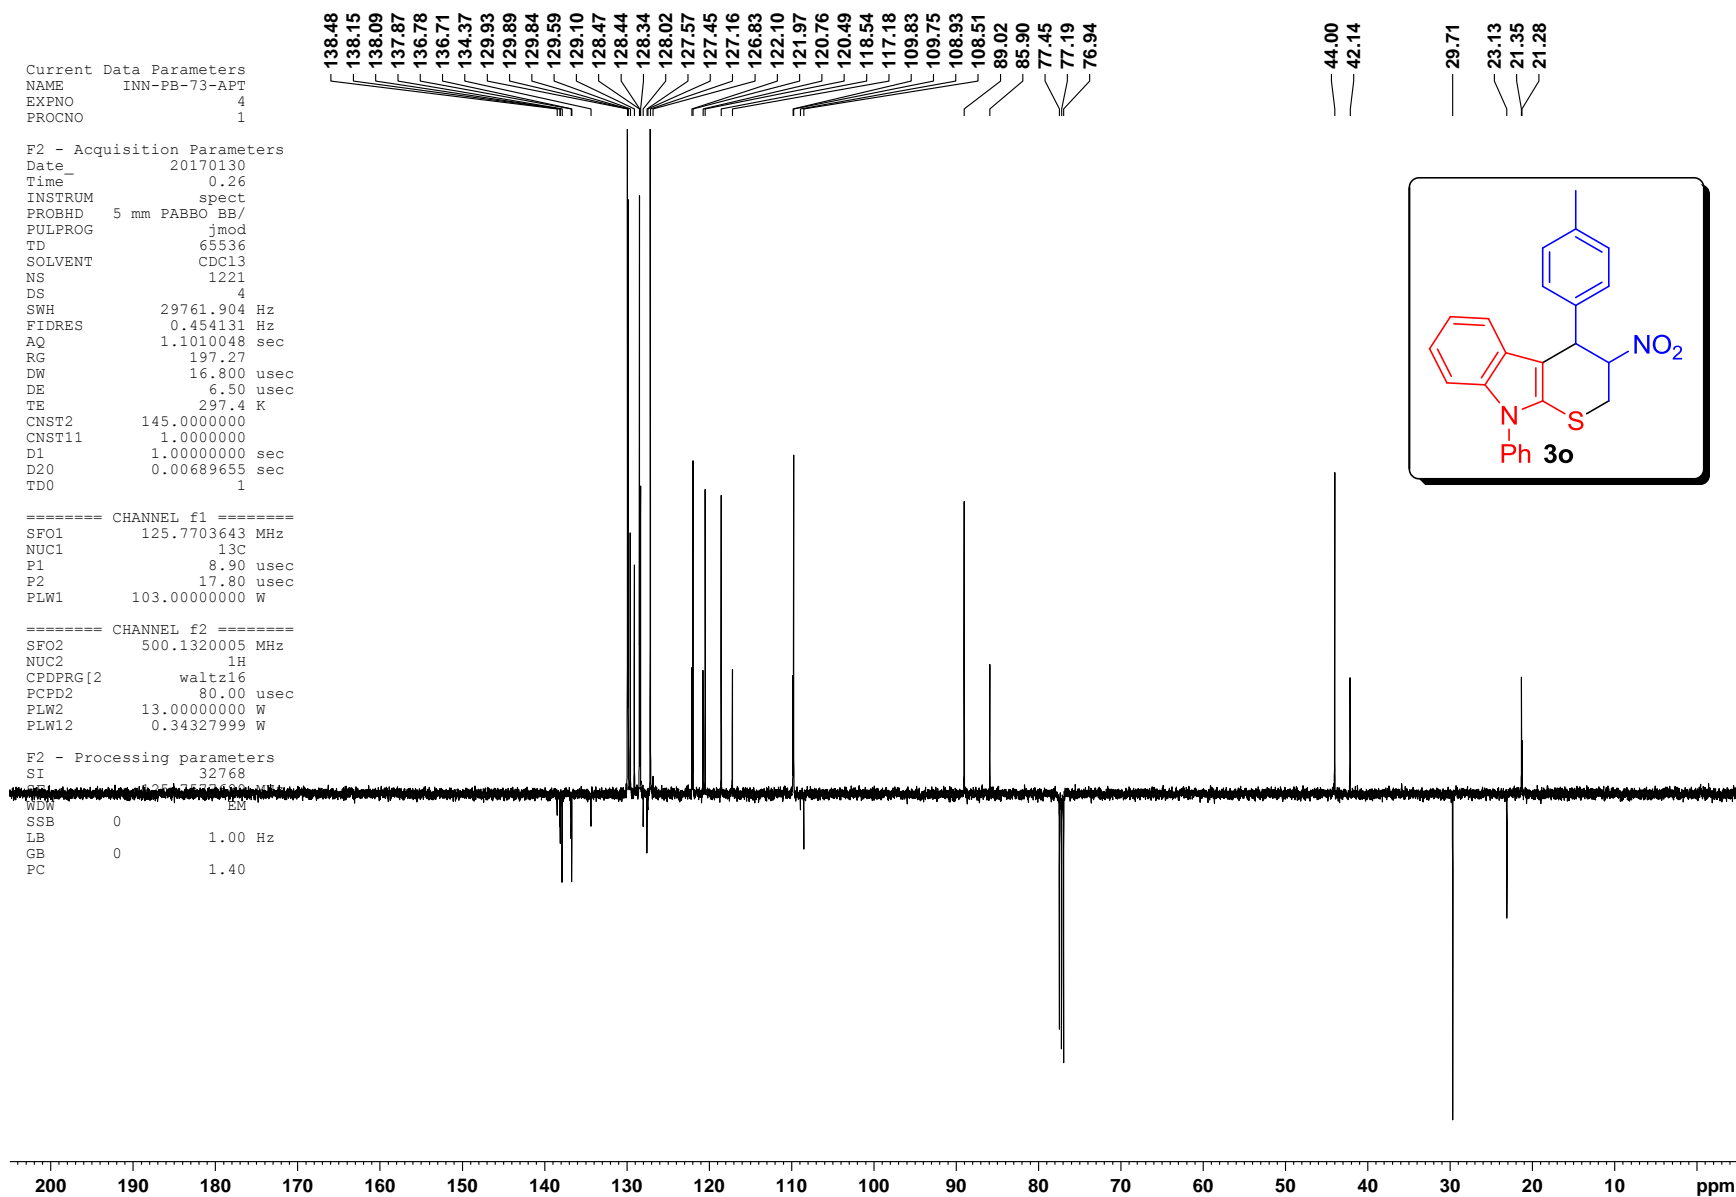Figure S49. <sup>13</sup>C-APT NMR Spectrum of 3o (major + minor, dr 75:25)

Current Data Parameters  
 NAME INN-PB-359-  
 EXPNO 8  
 PROCNO 1

## F2 - Acquisition Parameters

Date\_ 20190120  
 Time\_ 22.17  
 INSTRUM spect  
 PROBHD 5 mm PABBO BB/  
 PULPROG zg30  
 TD 65536  
 SOLVENT CDC13  
 NS 16  
 DS 0  
 SWH 10000.000 Hz  
 FIDRES 0.152588 Hz  
 AQ 3.2767999 sec  
 RG 30.72  
 DW 50.000 usec  
 DE 6.50 usec  
 TE 298.9 K  
 D1 1.00000000 sec  
 TD0 1

==== CHANNEL f1 =====  
 SFO1 500.1330885 MHz  
 NUC1 1H  
 P1 13.35 usec  
 PLW1 16.00000000 W

F2 - Processing parameters  
 SI 65536  
 SF 500.1300134 MHz  
 WDW EM  
 SSB 0  
 LB 0.30 Hz  
 GB 0  
 PC 1.00

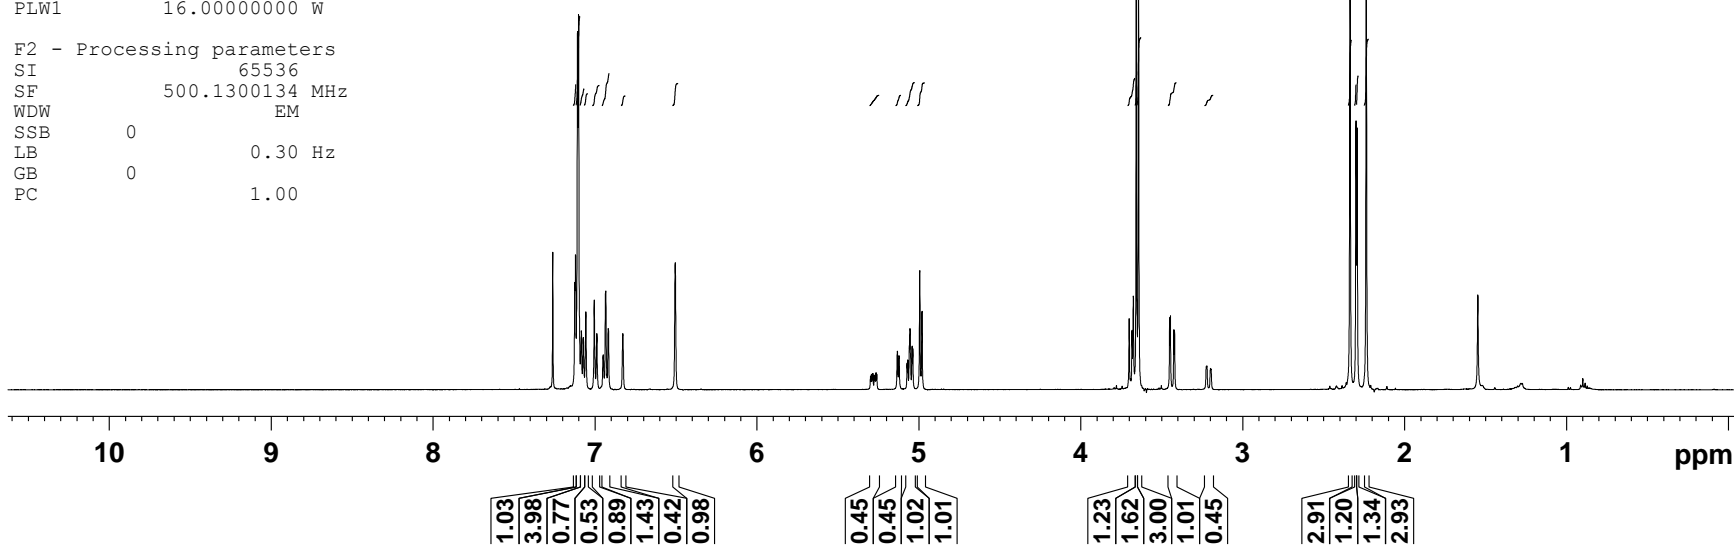

Figure S50. <sup>1</sup>H NMR Spectrum of 3p (major + minor, dr 69:31)

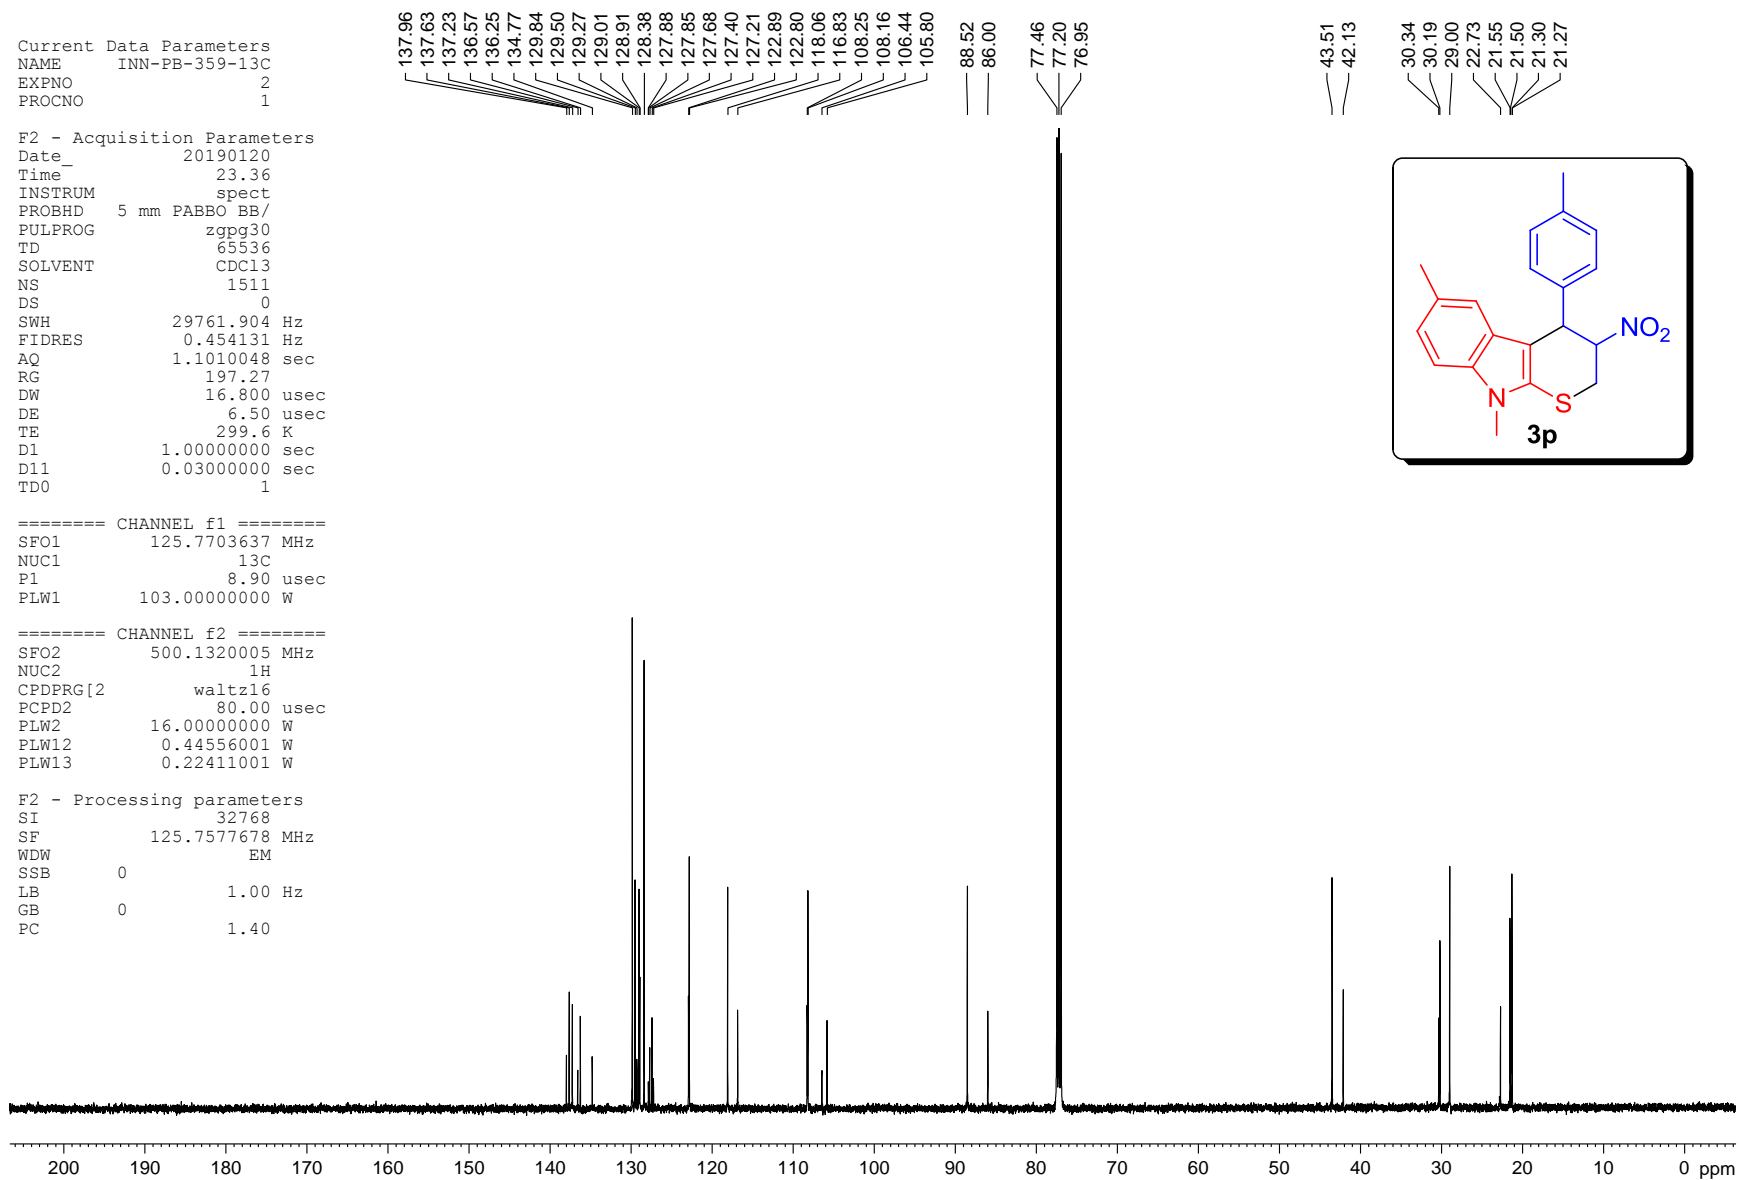Figure S51. <sup>13</sup>C NMR Spectrum of 3o (major + minor, dr 69:31)

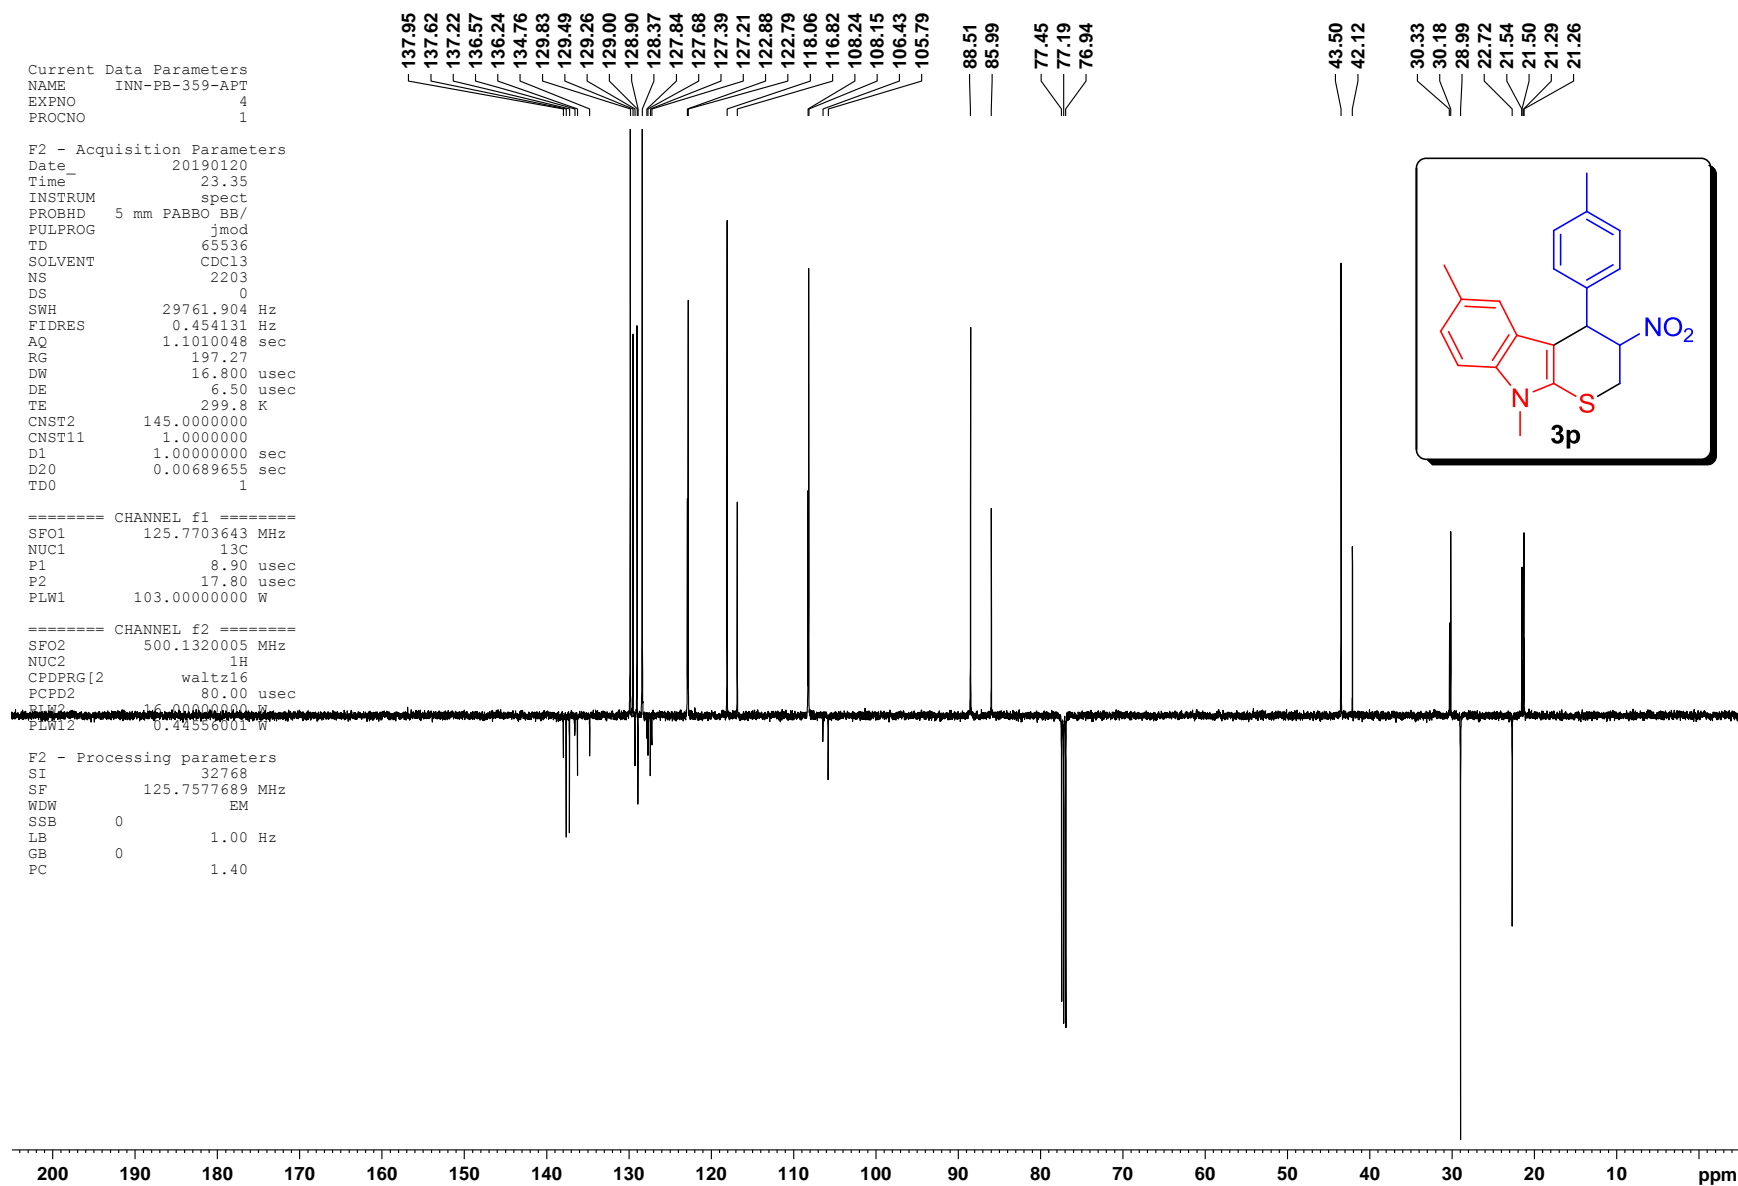

Current Data Parameters  
NAME INN-PB-360-1H  
EXPNO 4  
PROCNO 1

F2 - Acquisition Parameters  
Date\_ 20190120  
Time\_ 19.34  
INSTRUM spect  
PROBHD 5 mm PABBO BB/  
PULPROG zg30  
TD 65536  
SOLVENT CDCl3  
NS 5  
DS 0  
SWH 10000.000 Hz  
FIDRES 0.152588 Hz  
AQ 3.2767999 sec  
RG 85.91  
DW 50.000 usec  
DE 6.50 usec  
TE 299.1 K  
D1 1.00000000 sec  
TD0 1

==== CHANNEL f1 =====  
SFO1 500.1330885 MHz  
NUC1 1H  
P1 13.35 usec  
PLW1 16.00000000 W

F2 - Processing parameters  
SI 65536  
SF 500.1300135 MHz  
WDW EM  
SSB 0  
LB 0.30 Hz  
GB 0  
PC 1.00

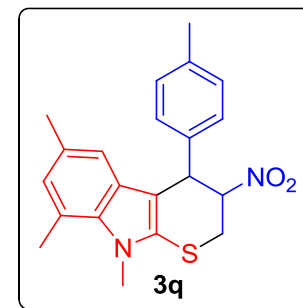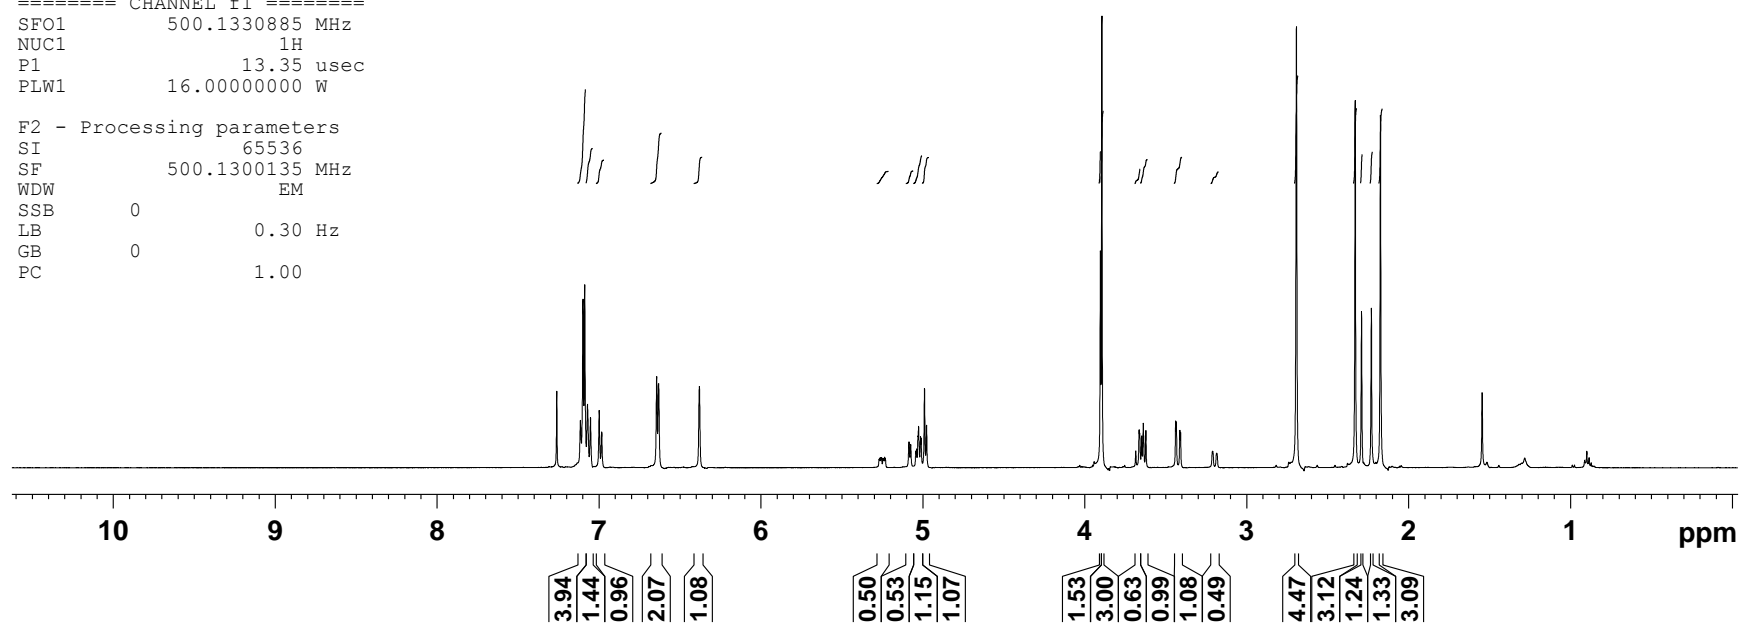

Figure S53. <sup>1</sup>H NMR Spectrum of 3q (major + minor, dr 66:34)



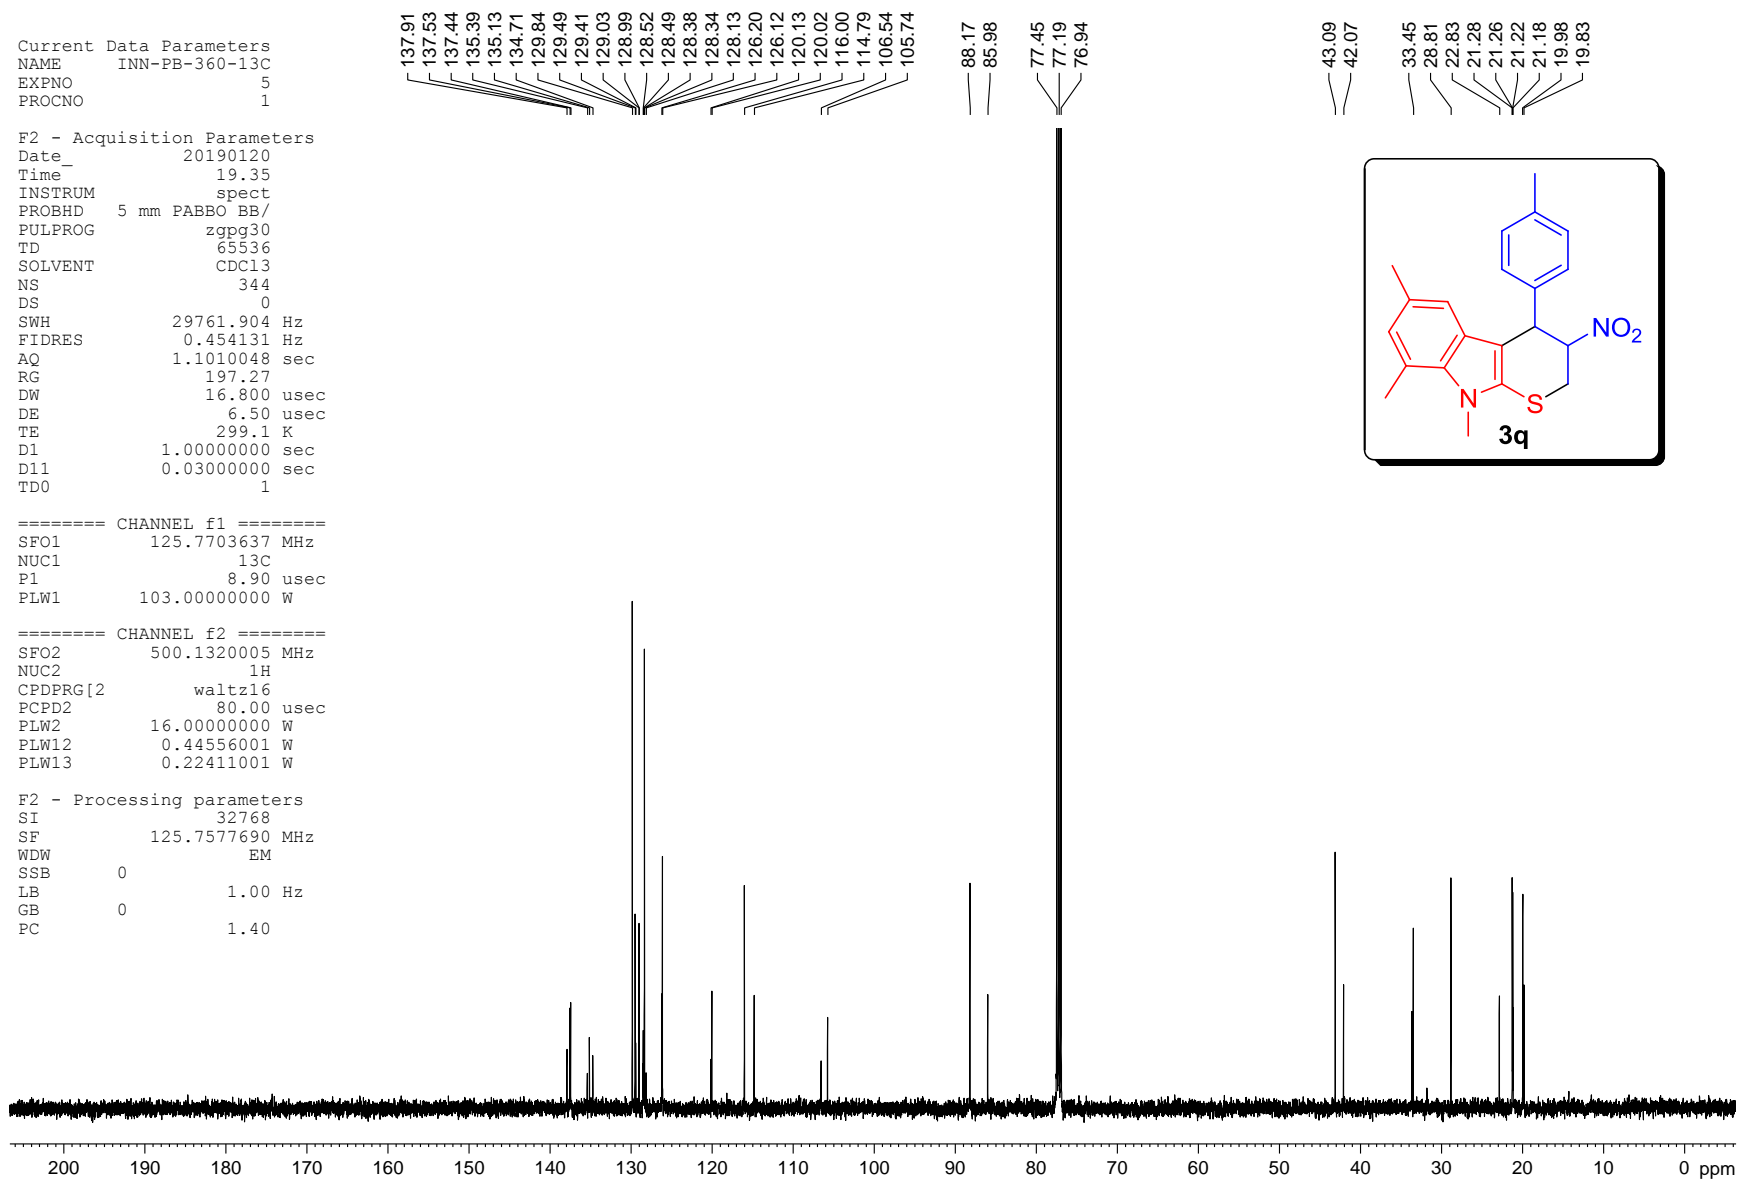Figure S54. <sup>13</sup>C NMR Spectrum of 3q (major + minor, dr 66:34)

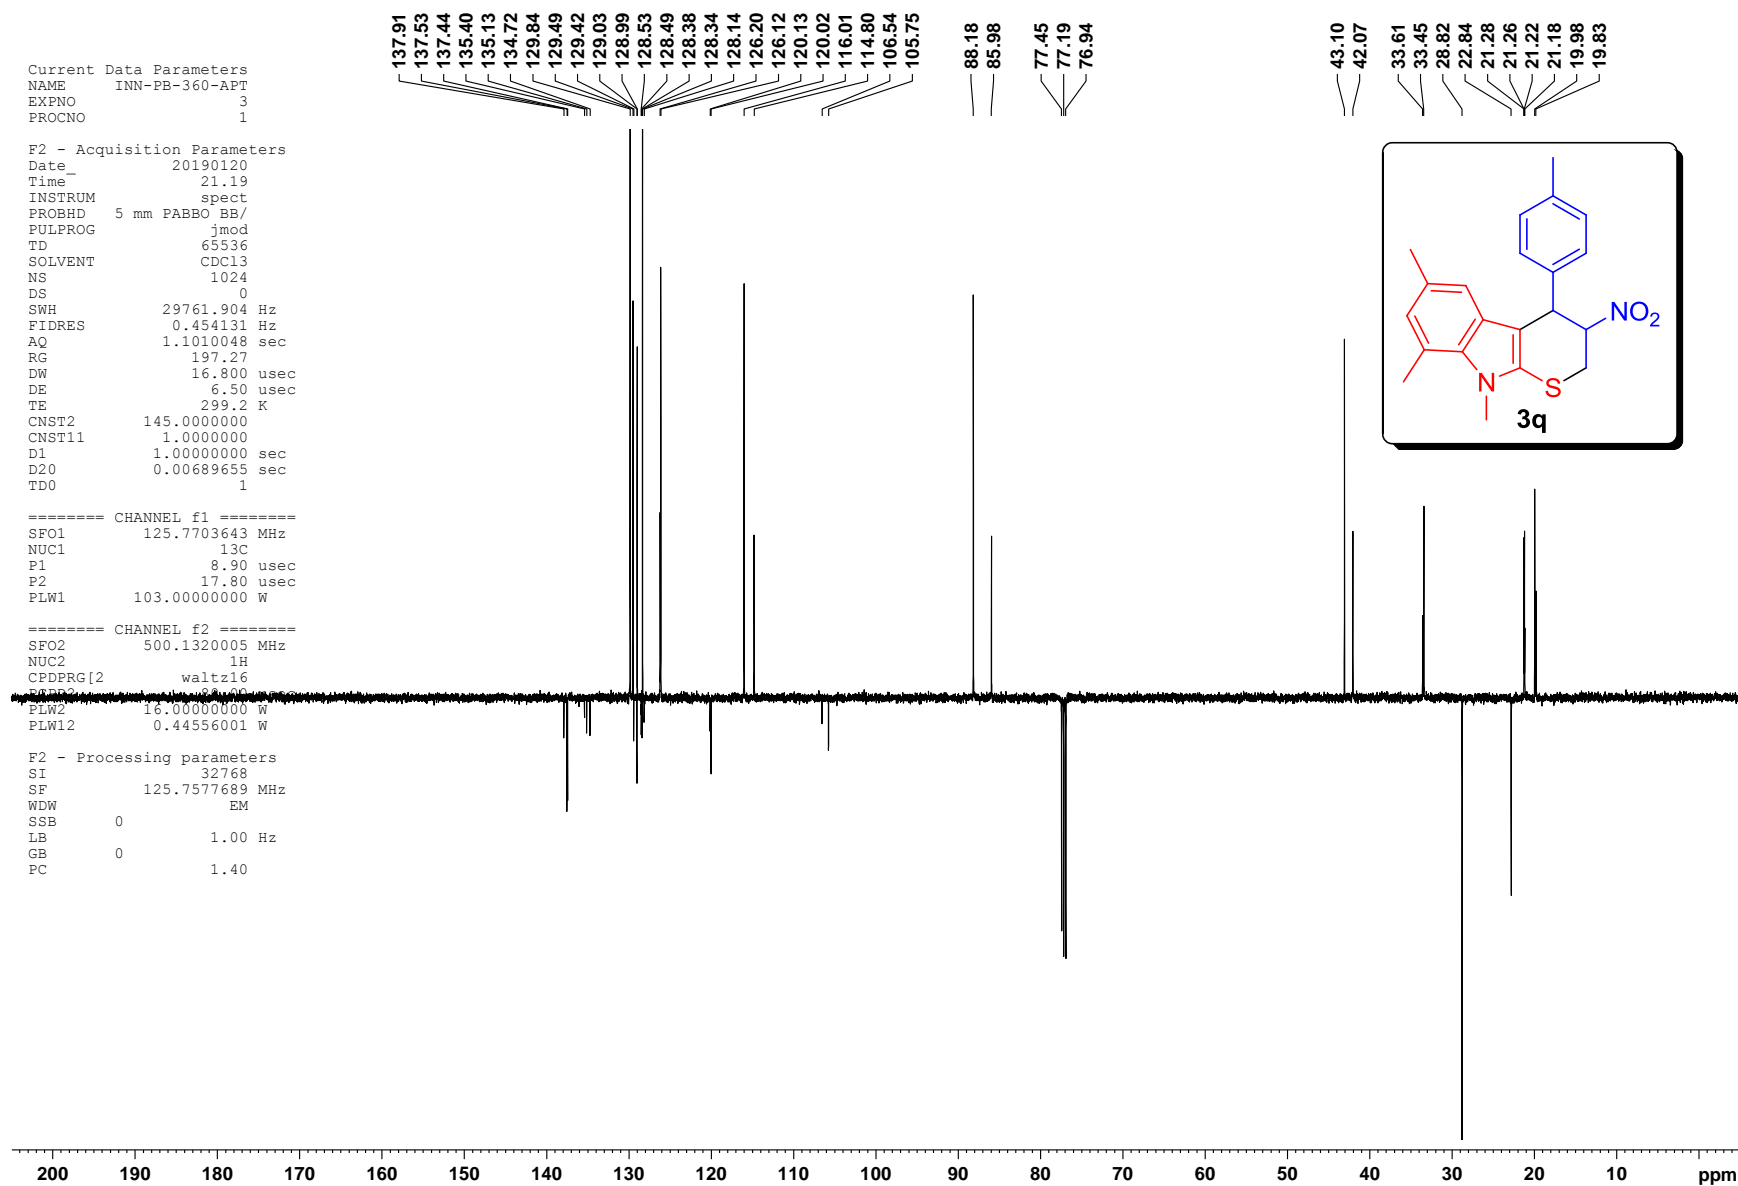

Current Data Parameters  
 NAME INN-PB-361-1H  
 EXPNO 3  
 PROCNO 1

## F2 - Acquisition Parameters

Date\_ 20190125  
 Time\_ 13.55  
 INSTRUM spect  
 PROBHD 5 mm PABBO BB/  
 PULPROG zg30  
 TD 65536  
 SOLVENT CDC13  
 NS 15  
 DS 0  
 SWH 10000.000 Hz  
 FIDRES 0.152588 Hz  
 AQ 3.2767999 sec  
 RG 61.42  
 DW 50.000 usec  
 DE 6.50 usec  
 TE 298.7 K  
 D1 1.00000000 sec  
 TD0 1

==== CHANNEL f1 =====  
 SFO1 500.1330885 MHz  
 NUC1 1H  
 P1 13.35 usec  
 PLW1 16.00000000 W

F2 - Processing parameters  
 SI 65536  
 SF 500.1300133 MHz  
 WDW EM  
 SSB 0  
 LB 0.30 Hz  
 GB 0  
 PC 1.00

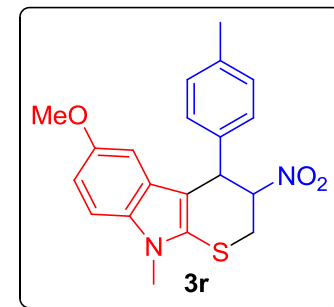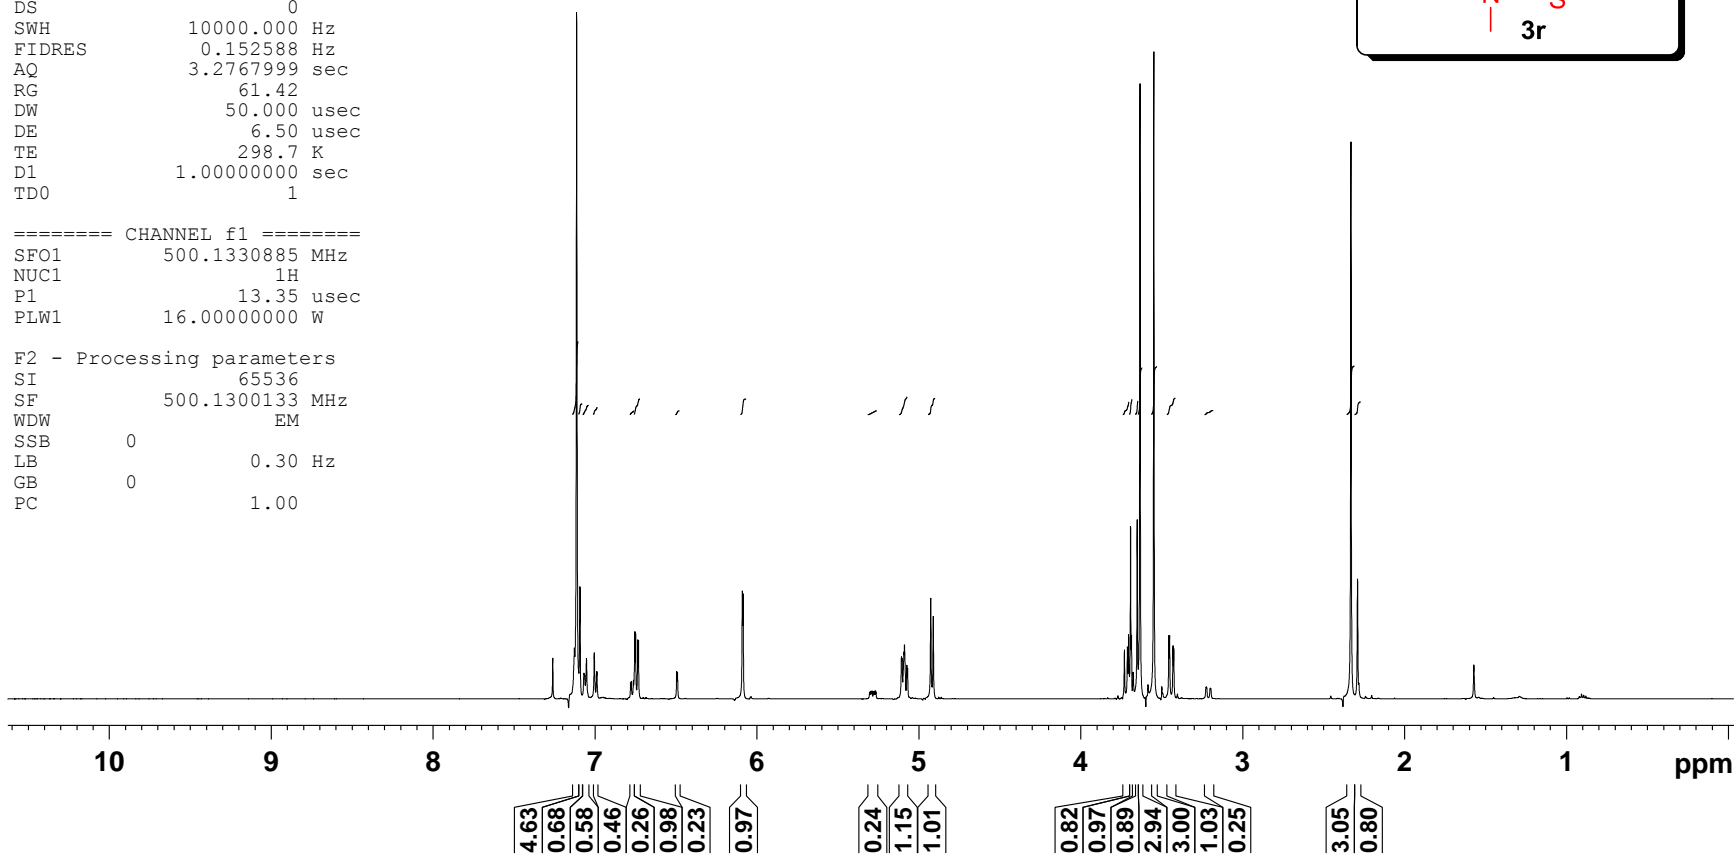

Figure S56. <sup>1</sup>H NMR Spectrum of 3r (major + minor, dr 79:21)

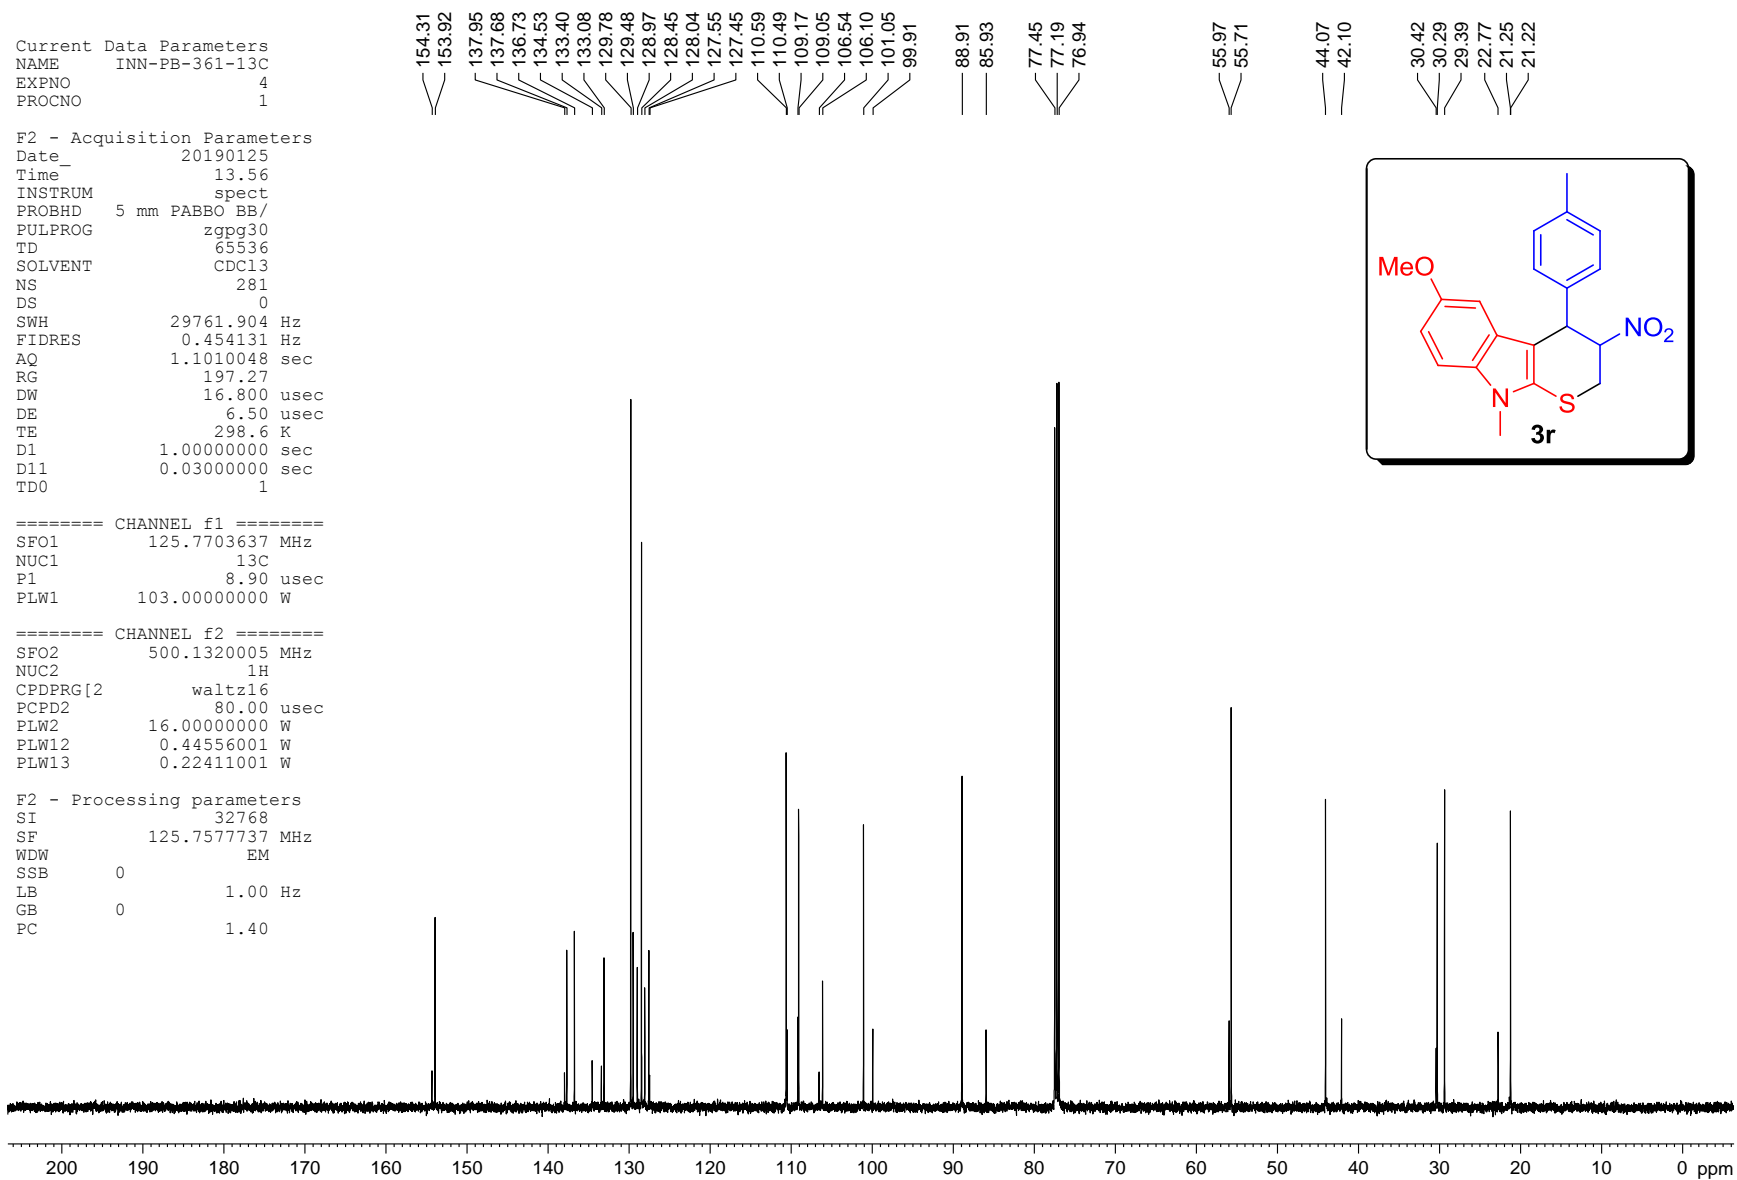Figure S57. <sup>13</sup>C NMR Spectrum of 3r (major + minor, dr 79:21)

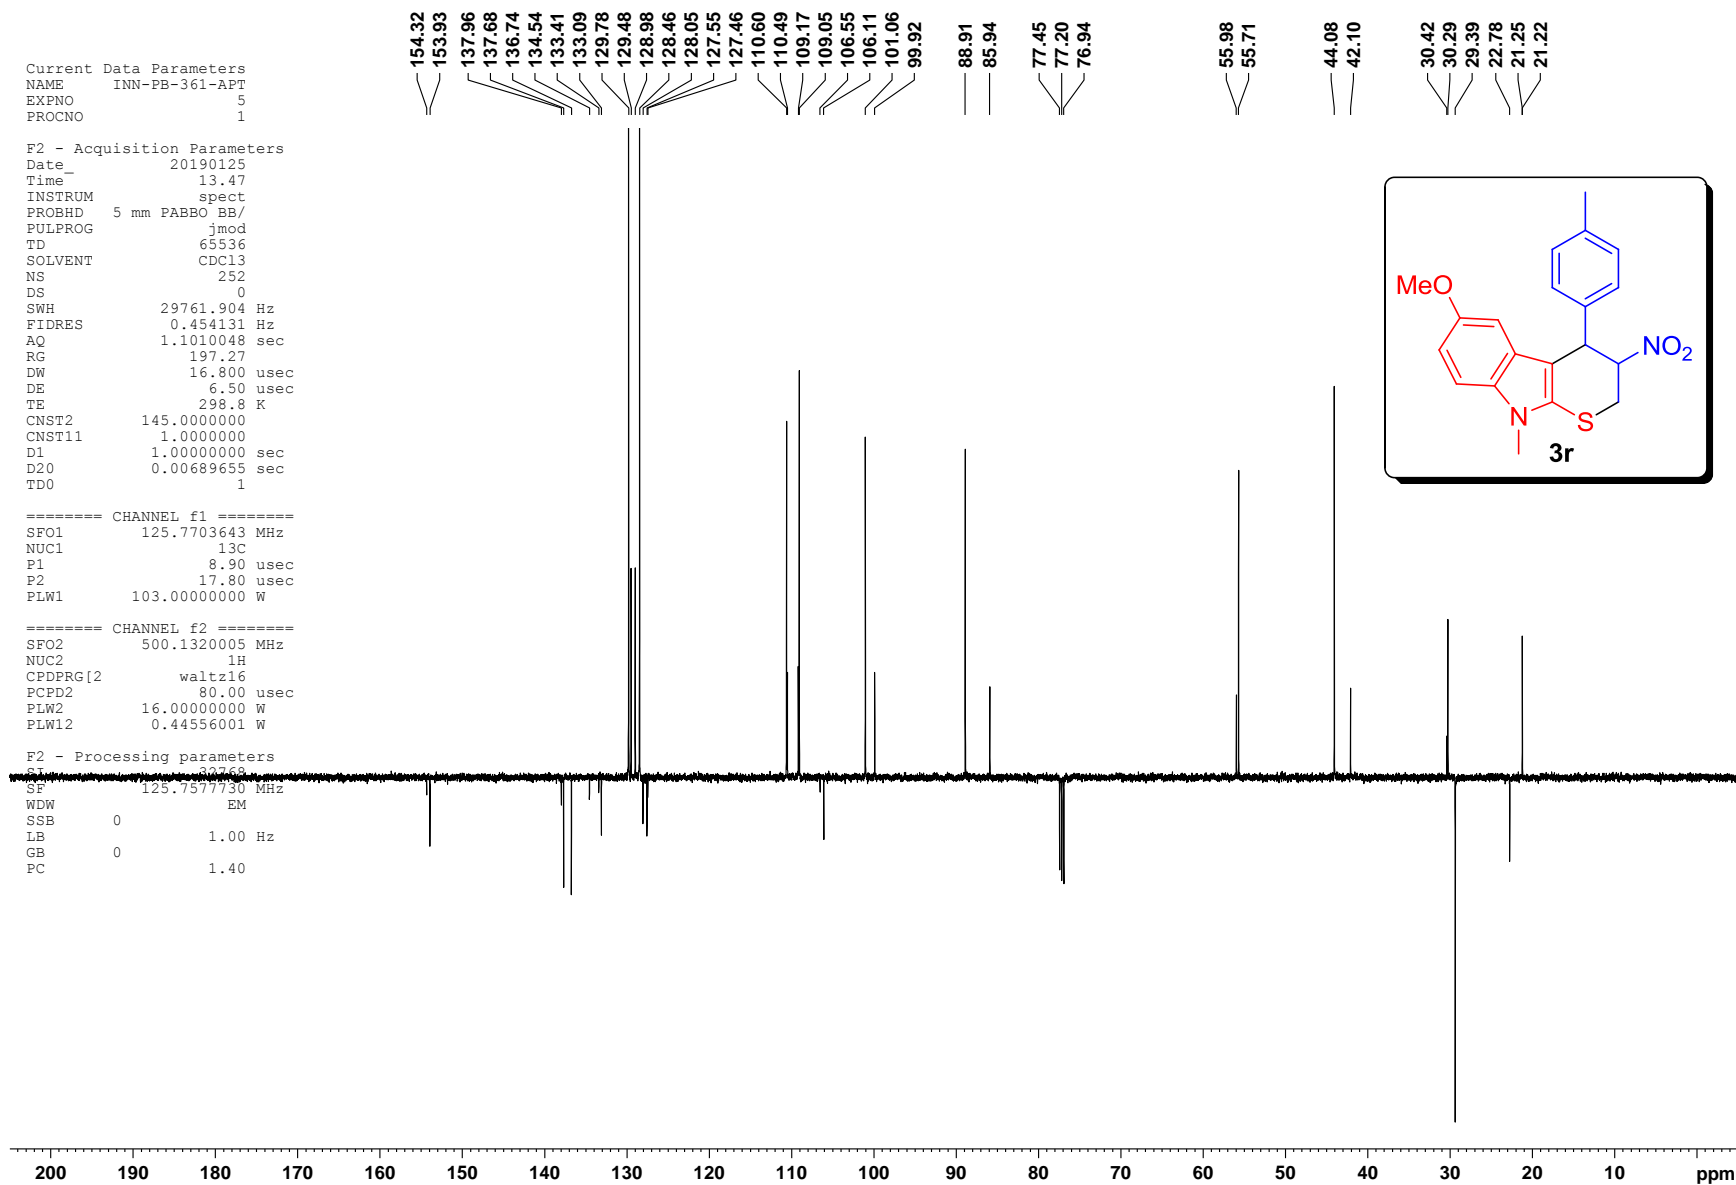Figure S58. <sup>13</sup>C-APT NMR Spectrum of 3r (major + minor, dr 79:21)

Current Data Parameters  
 NAME INN-2-PB-SO2-1H  
 EXPNO 3  
 PROCNO 1

F2 - Acquisition Parameters  
 Date\_ 20170222  
 Time\_ 15.00  
 INSTRUM spect  
 PROBHD 5 mm PABBO BB/  
 PULPROG zg30  
 TD 65536  
 SOLVENT CDCl3  
 NS 16  
 DS 2  
 SWH 10000.000 Hz  
 FIDRES 0.152588 Hz  
 AQ 3.2767999 sec  
 RG 69.35  
 DW 50.000 usec  
 DE 6.50 usec  
 TE 297.9 K  
 D1 1.00000000 sec  
 TD0 1

==== CHANNEL f1 =====  
 SFO1 500.1330885 MHz  
 NUC1 1H  
 P1 13.00 usec  
 PLW1 13.00000000 W

F2 - Processing parameters  
 SI 65536  
 SF 500.1300103 MHz  
 WDW EM  
 SSB 0  
 LB 0.30 Hz  
 GB 0  
 PC 1.00

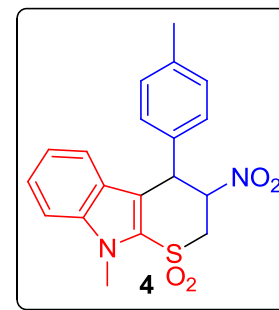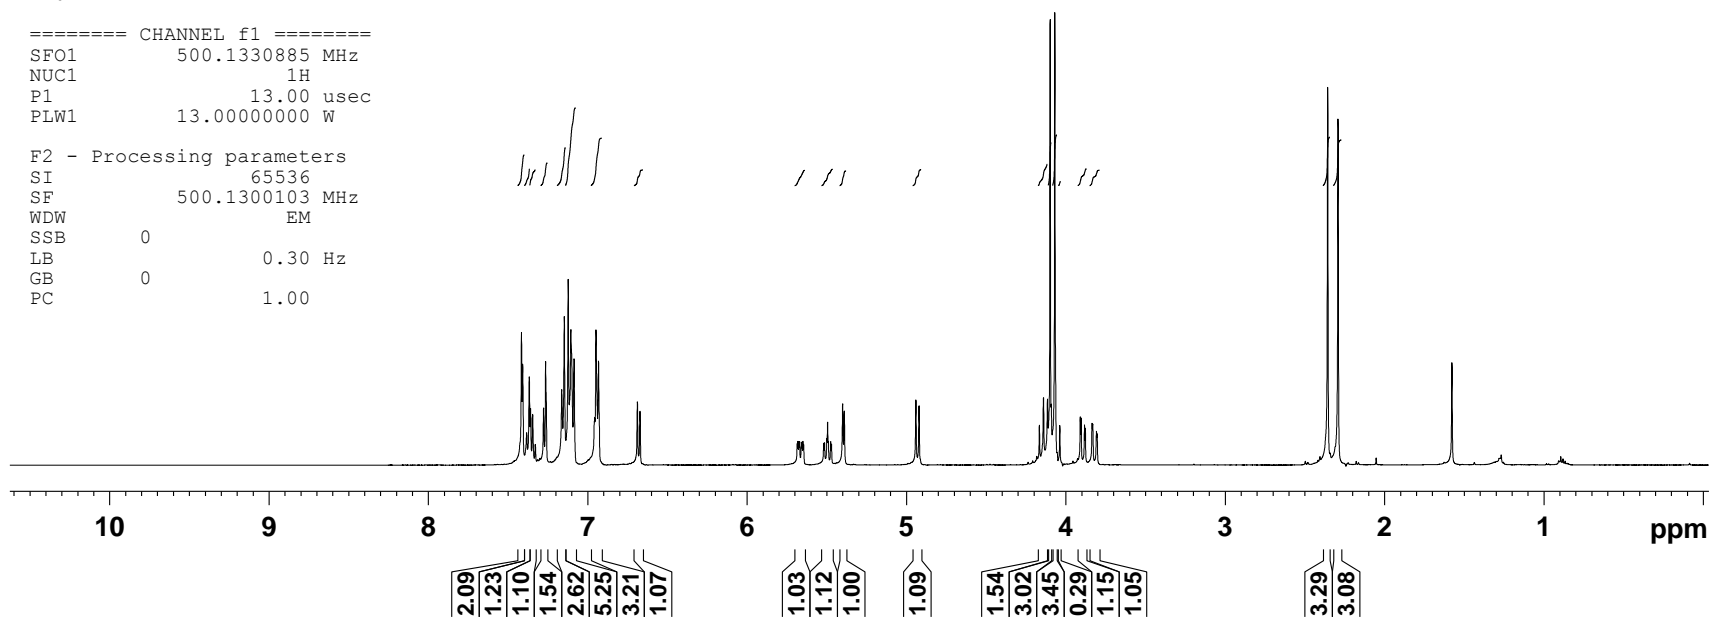

Figure S59. <sup>1</sup>H NMR Spectrum of 4 (major + minor, dr 50:50)

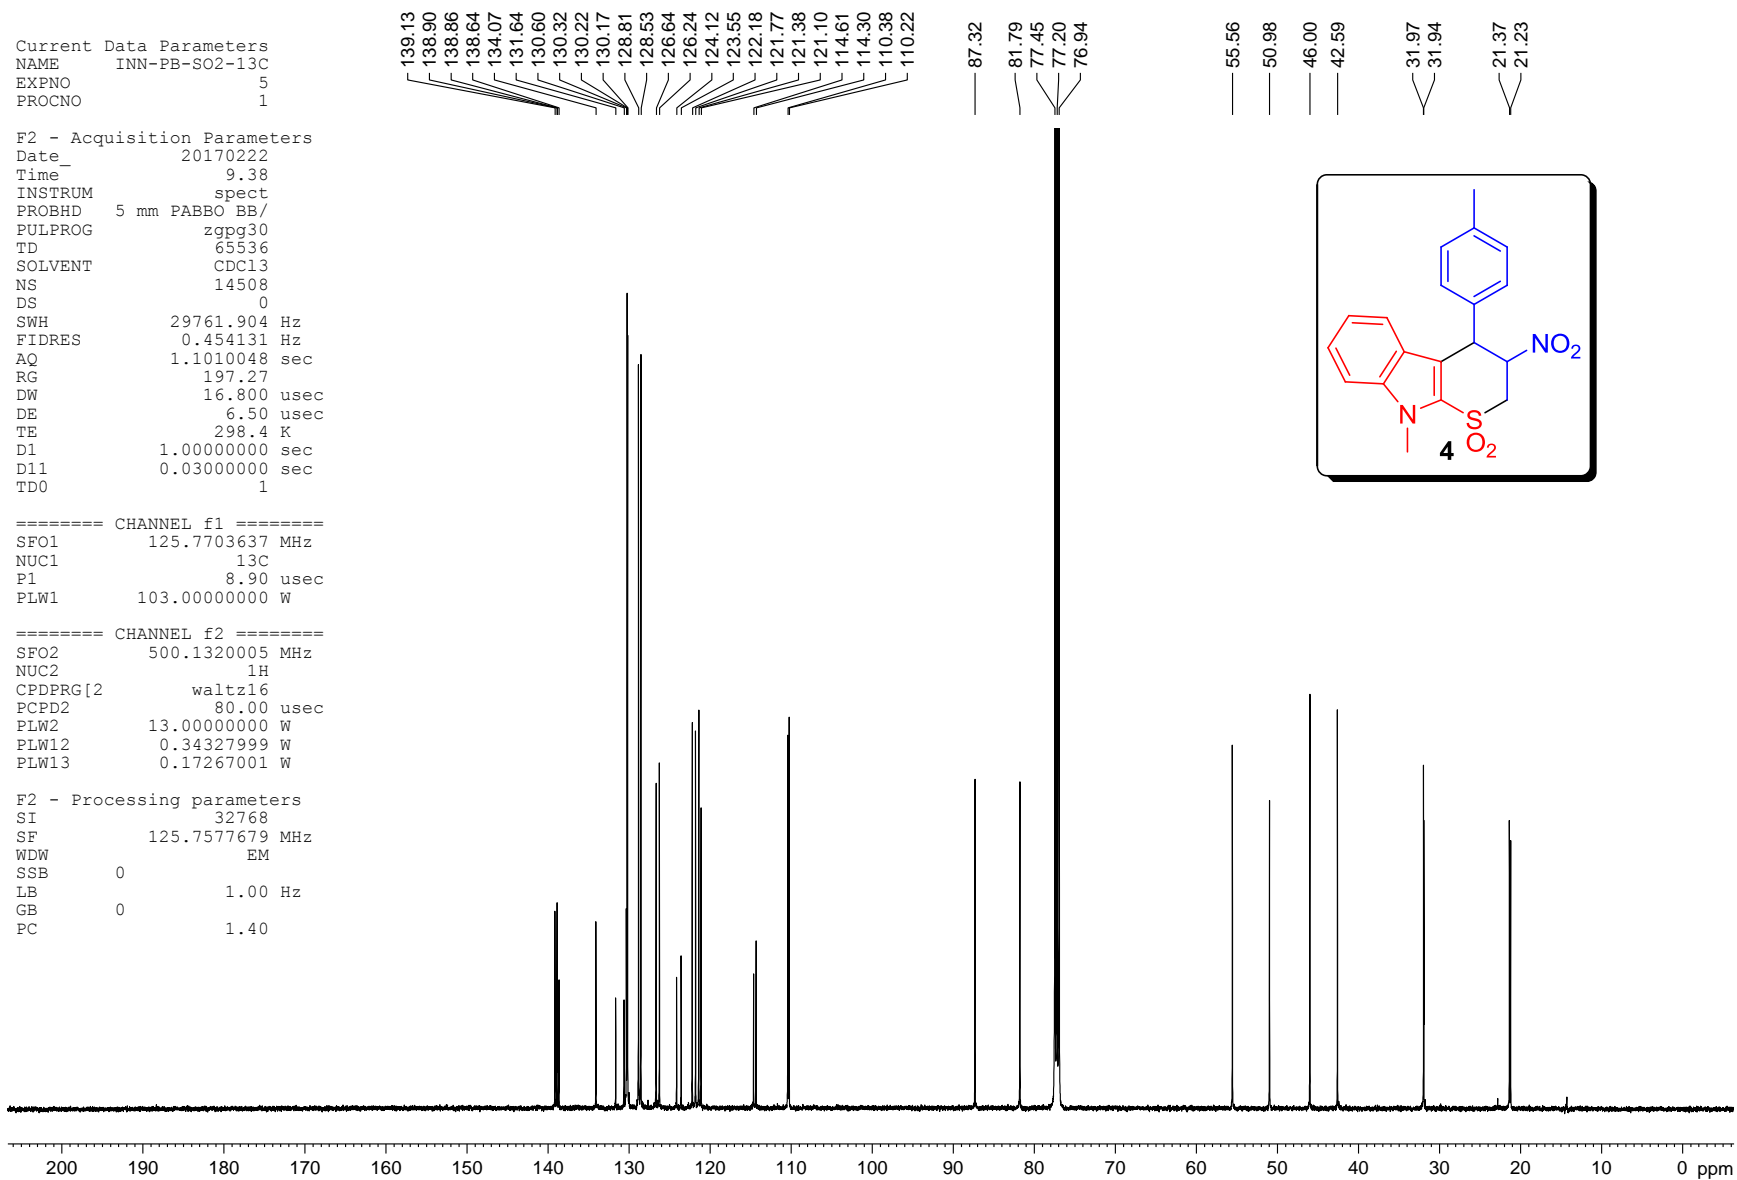Figure S60. <sup>13</sup>C NMR Spectrum of 4 (major + minor, dr 50:50)

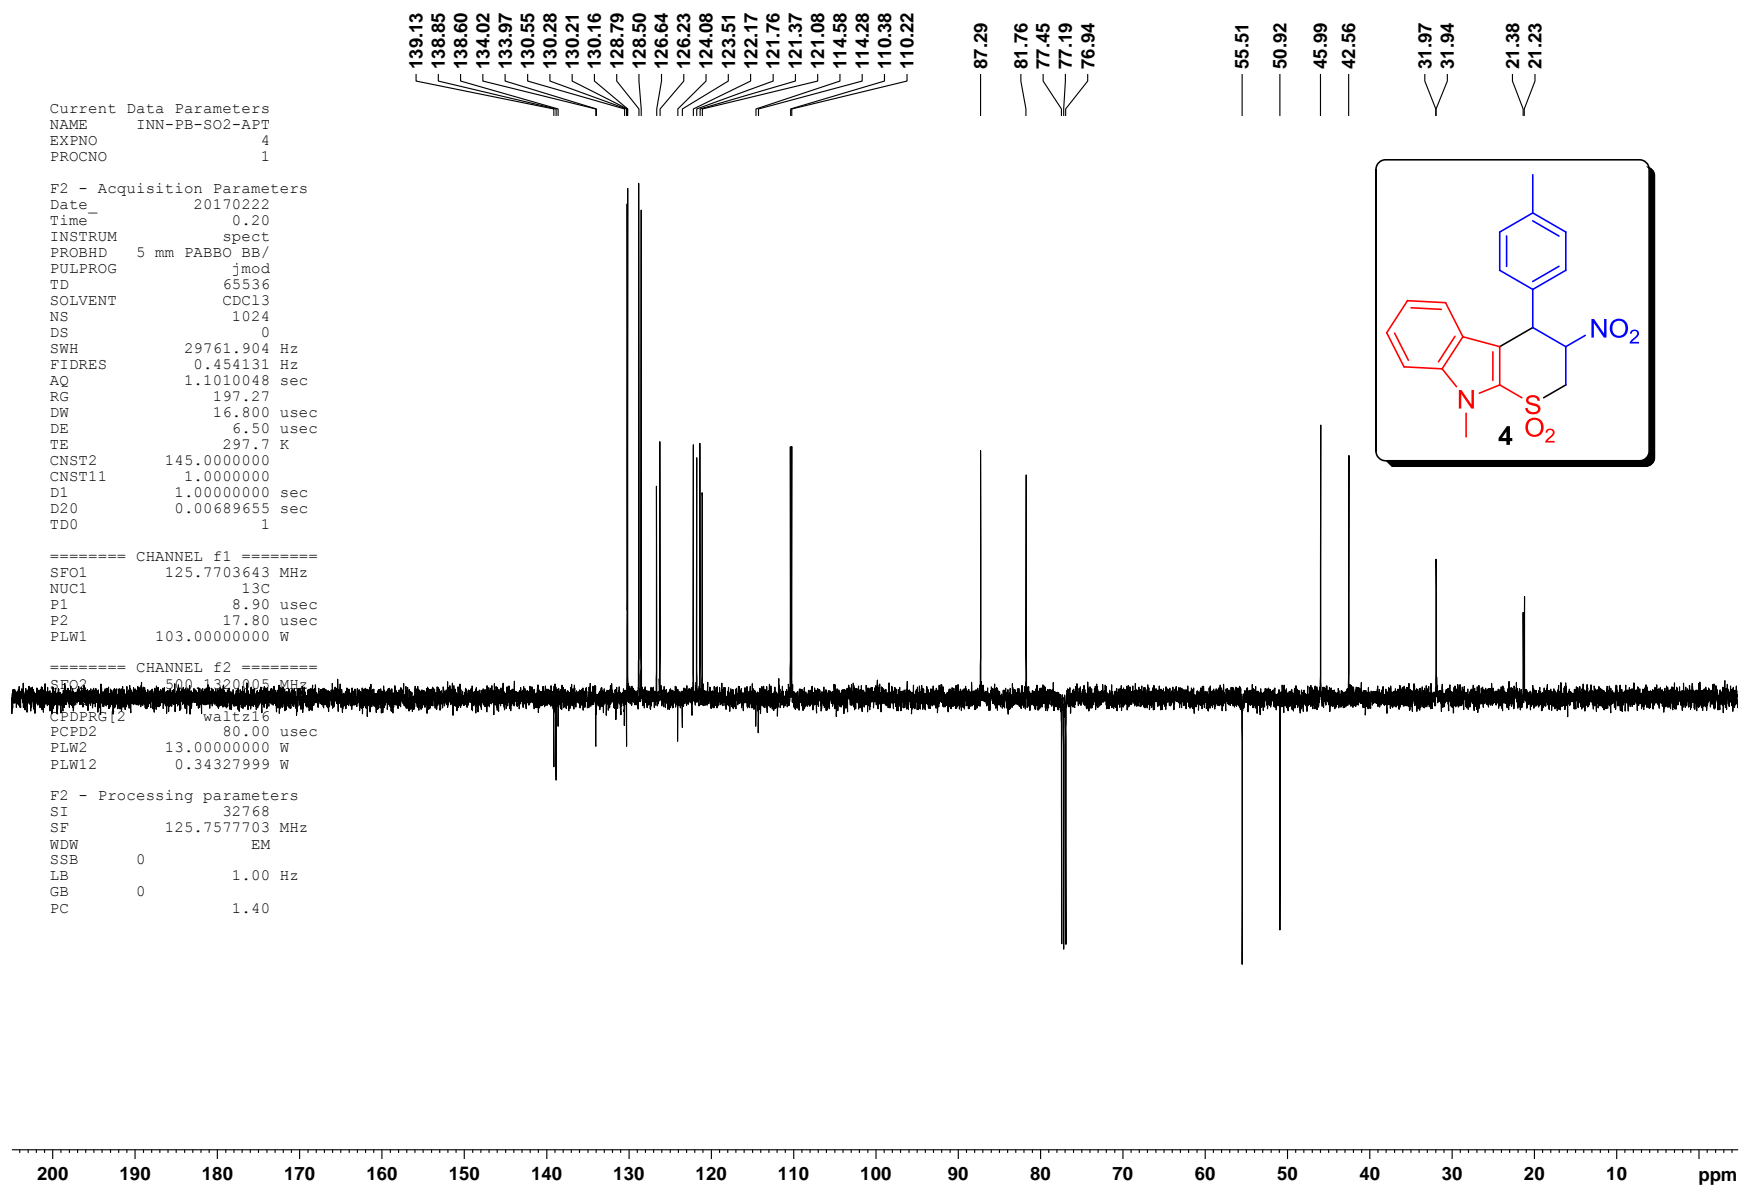Figure S61. <sup>13</sup>C-APT NMR Spectrum of 4 (major + minor, dr 50:50)



Current Data Parameters  
 NAME INN-PB-AZIDE-1H  
 EXPNO 2  
 PROCNO 1

F2 - Acquisition Parameters  
 Date\_ 20141222  
 Time 16.14  
 INSTRUM spect  
 PROBHD 5 mm PABBO BB-  
 PULPROG zg30  
 TD 54274  
 SOLVENT CDC13  
 NS 16  
 DS 0  
 SWH 8223.685 Hz  
 FIDRES 0.151522 Hz  
 AQ 3.2998593 sec  
 RG 32  
 DW 60.800 usec  
 DE 6.50 usec  
 TE 295.3 K  
 D1 1.00000000 sec  
 TD0 1

==== CHANNEL f1 =====  
 NUC1 1H  
 P1 14.75 usec  
 PL1 -1.00 dB  
 PL1W 10.56200695 W  
 SFO1 400.1324710 MHz

F2 - Processing parameters  
 SI 32768  
 SF 400.1300098 MHz  
 WDW EM  
 SSB 0  
 LB 0.30 Hz  
 GB 0  
 PC 1.00

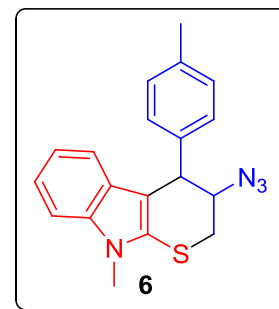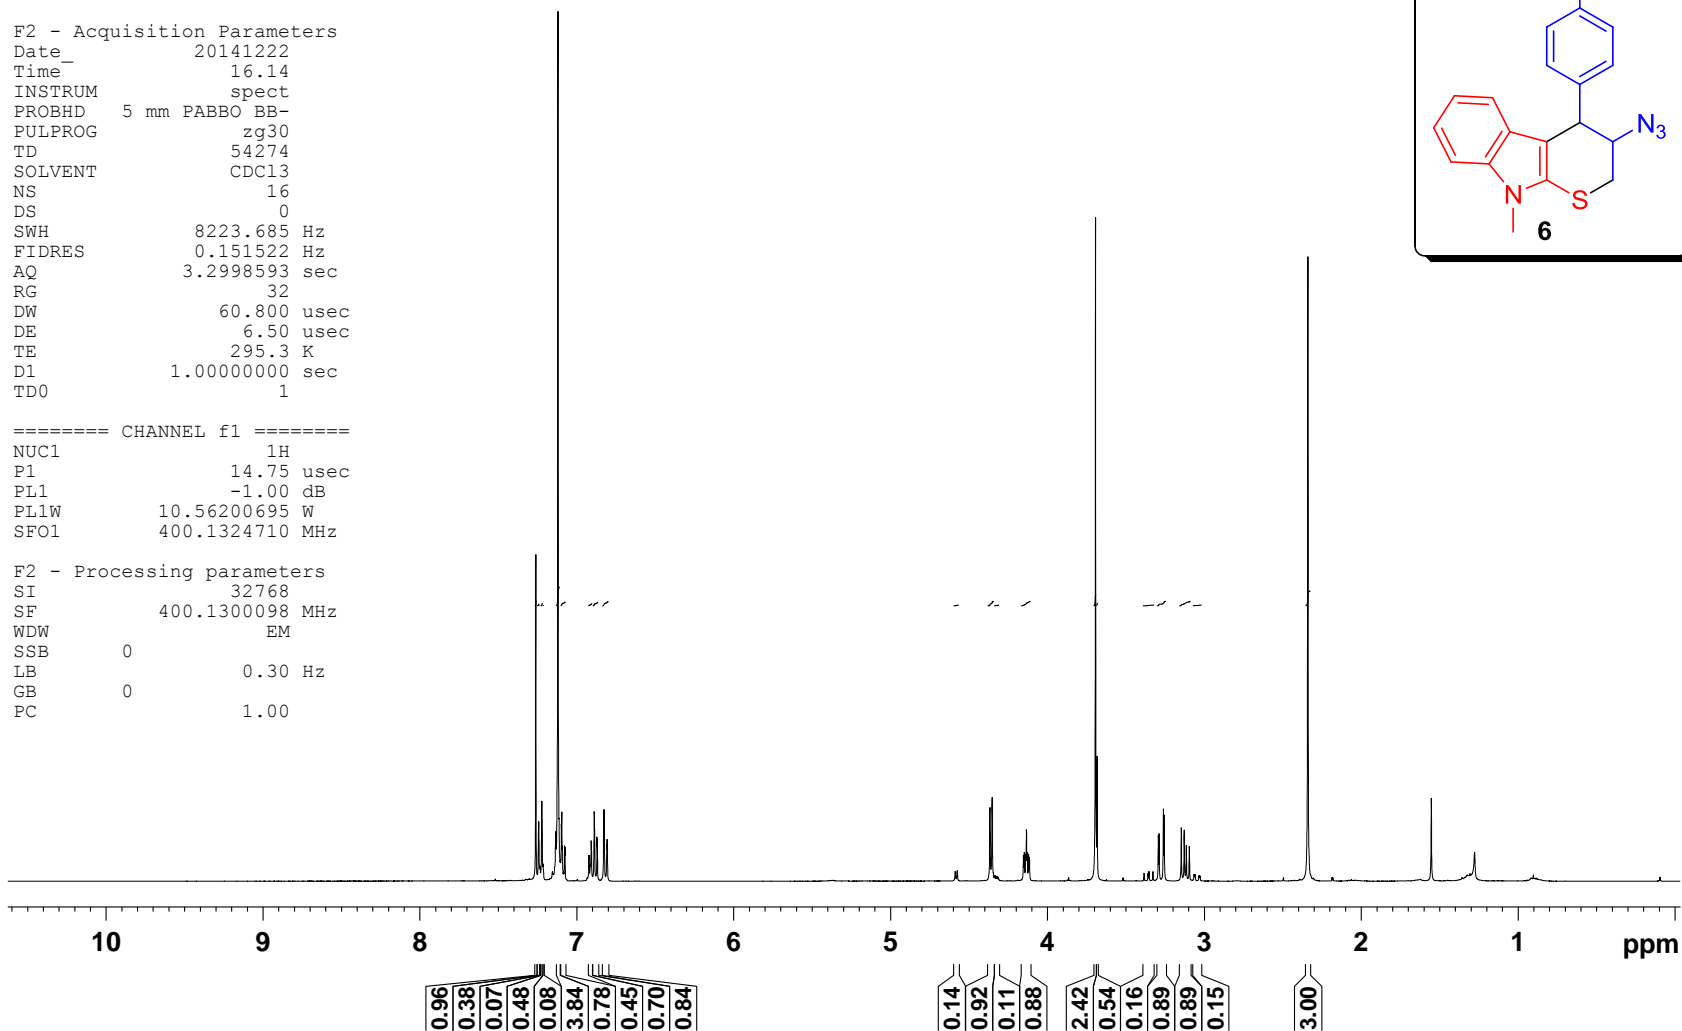

Figure S62.  $^1\text{H}$  NMR Spectrum of 6 (major + minor, dr 85:15)

Current Data Parameters  
 NAME INN-PB-AZIDE-13C  
 EXPNO 3  
 PROCNO 1

F2 - Acquisition Parameters  
 Date\_ 20141222  
 Time\_ 16.14  
 INSTRUM spect  
 PROBHD 5 mm PABBO BB-  
 PULPROG zgpg30  
 TD 65536  
 SOLVENT CDCl3  
 NS 366  
 DS 4  
 SWH 26041.666 Hz  
 FIDRES 0.397364 Hz  
 AQ 1.2582912 sec  
 RG 2050  
 DW 19.200 usec  
 DE 6.50 usec  
 TE 295.3 K  
 D1 1.00000000 sec  
 D11 0.03000000 sec  
 TDO 1

==== CHANNEL f1 =====  
 NUC1 13C  
 P1 8.50 usec  
 PL1 -2.00 dB  
 PL1W 56.53121948 W  
 SFO1 100.6238364 MHz

==== CHANNEL f2 =====  
 CPDPRG[2] waltz16  
 NUC2 1H  
 PCPD2 80.00 usec  
 PL2 -1.00 dB  
 PL12 13.69 dB  
 PL13 14.50 dB  
 PL2W 10.56200695 W  
 PL12W 0.35871249 W  
 PL13W 0.29767781 W  
 SFO2 400.1316005 MHz

F2 - Processing parameters  
 SI 32768  
 SF 100.6127545 MHz  
 WDW EM  
 SSB 0  
 LB 1.00 Hz  
 GB 0  
 PC 1.40

139.18  
137.76  
137.15  
137.02  
136.56  
129.94  
129.57  
129.05  
128.71  
128.67  
128.46  
127.67  
127.37  
120.89  
119.46  
119.41  
117.86  
117.57  
108.30  
107.32  
106.17

77.52  
77.40  
77.20  
76.88

62.96  
61.44

44.50  
42.59

30.15  
30.08  
28.97  
27.16  
21.27

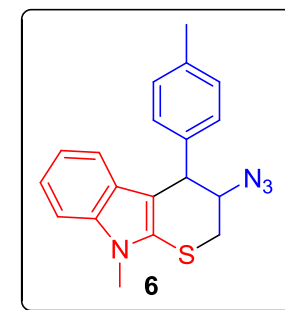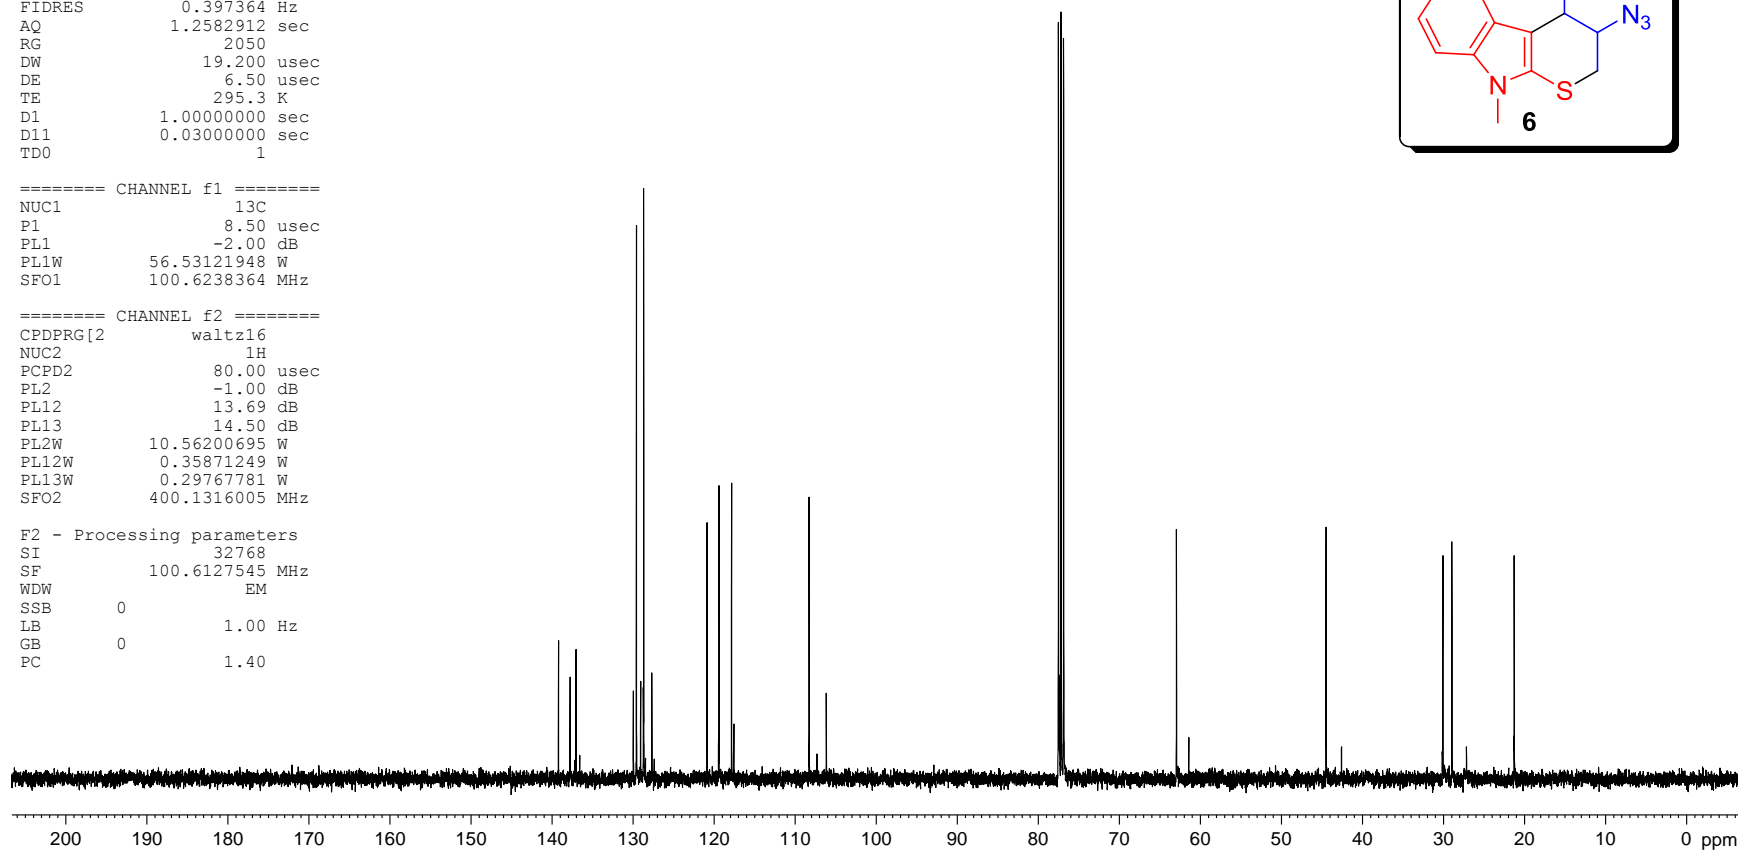

Figure S63.  $^{13}\text{C}$  NMR Spectrum of 6 (major + minor, dr 85:15)

Current Data Parameters  
 NAME inn-pb-triazazole-1h  
 EXPNO 1  
 PROCNO 1

F2 - Acquisition Parameters  
 Date\_ 20141229  
 Time\_ 21.40  
 INSTRUM spect  
 PROBHD 5 mm PABBO BB-  
 PULPROG zg30  
 TD 54274  
 SOLVENT CDC13  
 NS 16  
 DS 0  
 SWH 8223.685 Hz  
 FIDRES 0.151522 Hz  
 AQ 3.2998593 sec  
 RG 114  
 DW 60.800 usec  
 DE 6.50 usec  
 TE 296.4 K  
 D1 1.00000000 sec  
 TD0 1

==== CHANNEL f1 =====  
 NUC1 1H  
 P1 14.75 usec  
 PL1 -1.00 dB  
 PL1W 10.56200695 W  
 SFO1 400.1324710 MHz

F2 - Processing parameters  
 SI 32768  
 SF 400.1300451 MHz  
 WDW EM  
 SSB 0  
 LB 0.30 Hz  
 GB 0  
 PC 1.00

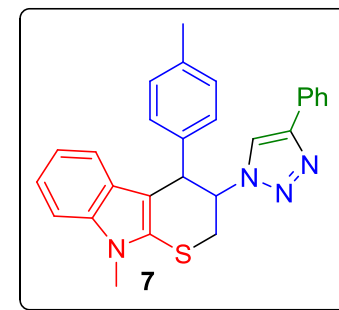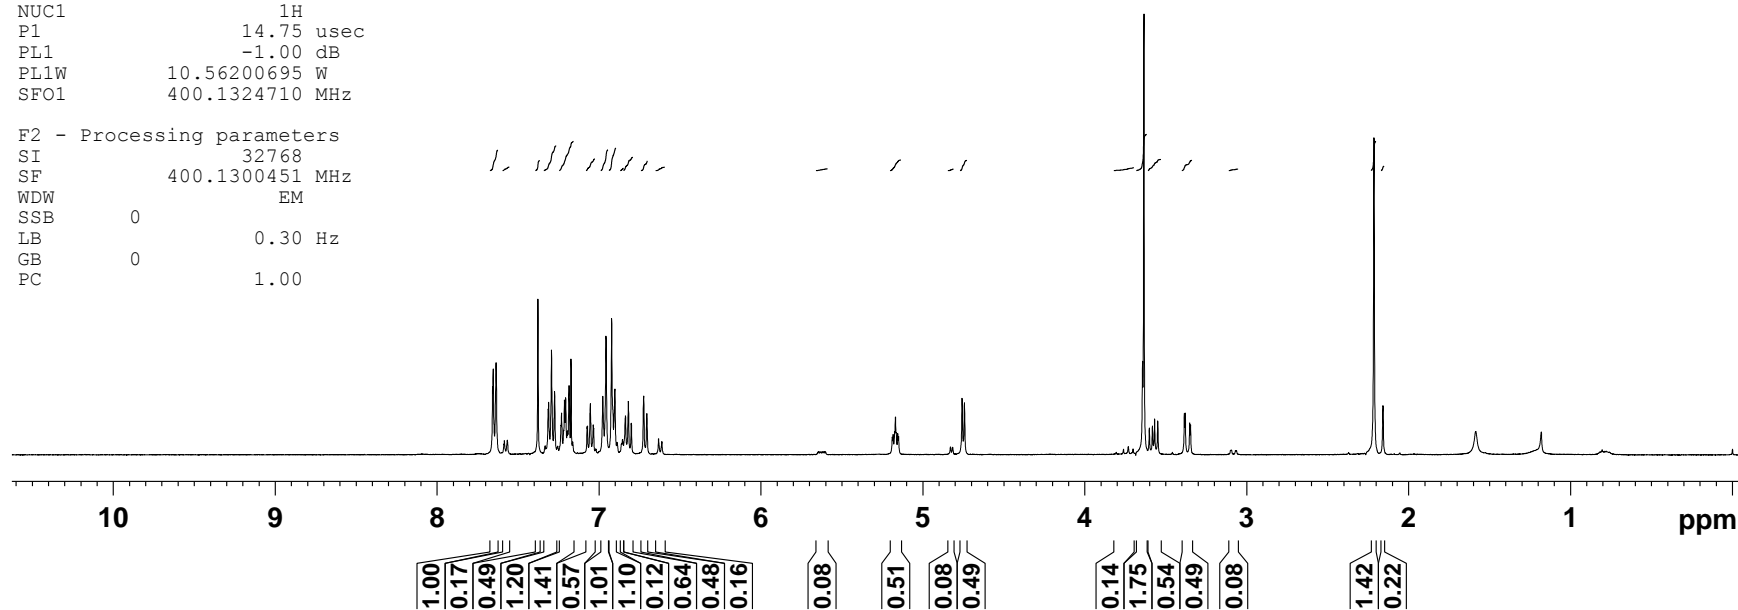

Figure S64. <sup>1</sup>H NMR Spectrum of 7 (major + minor, dr 86:14)

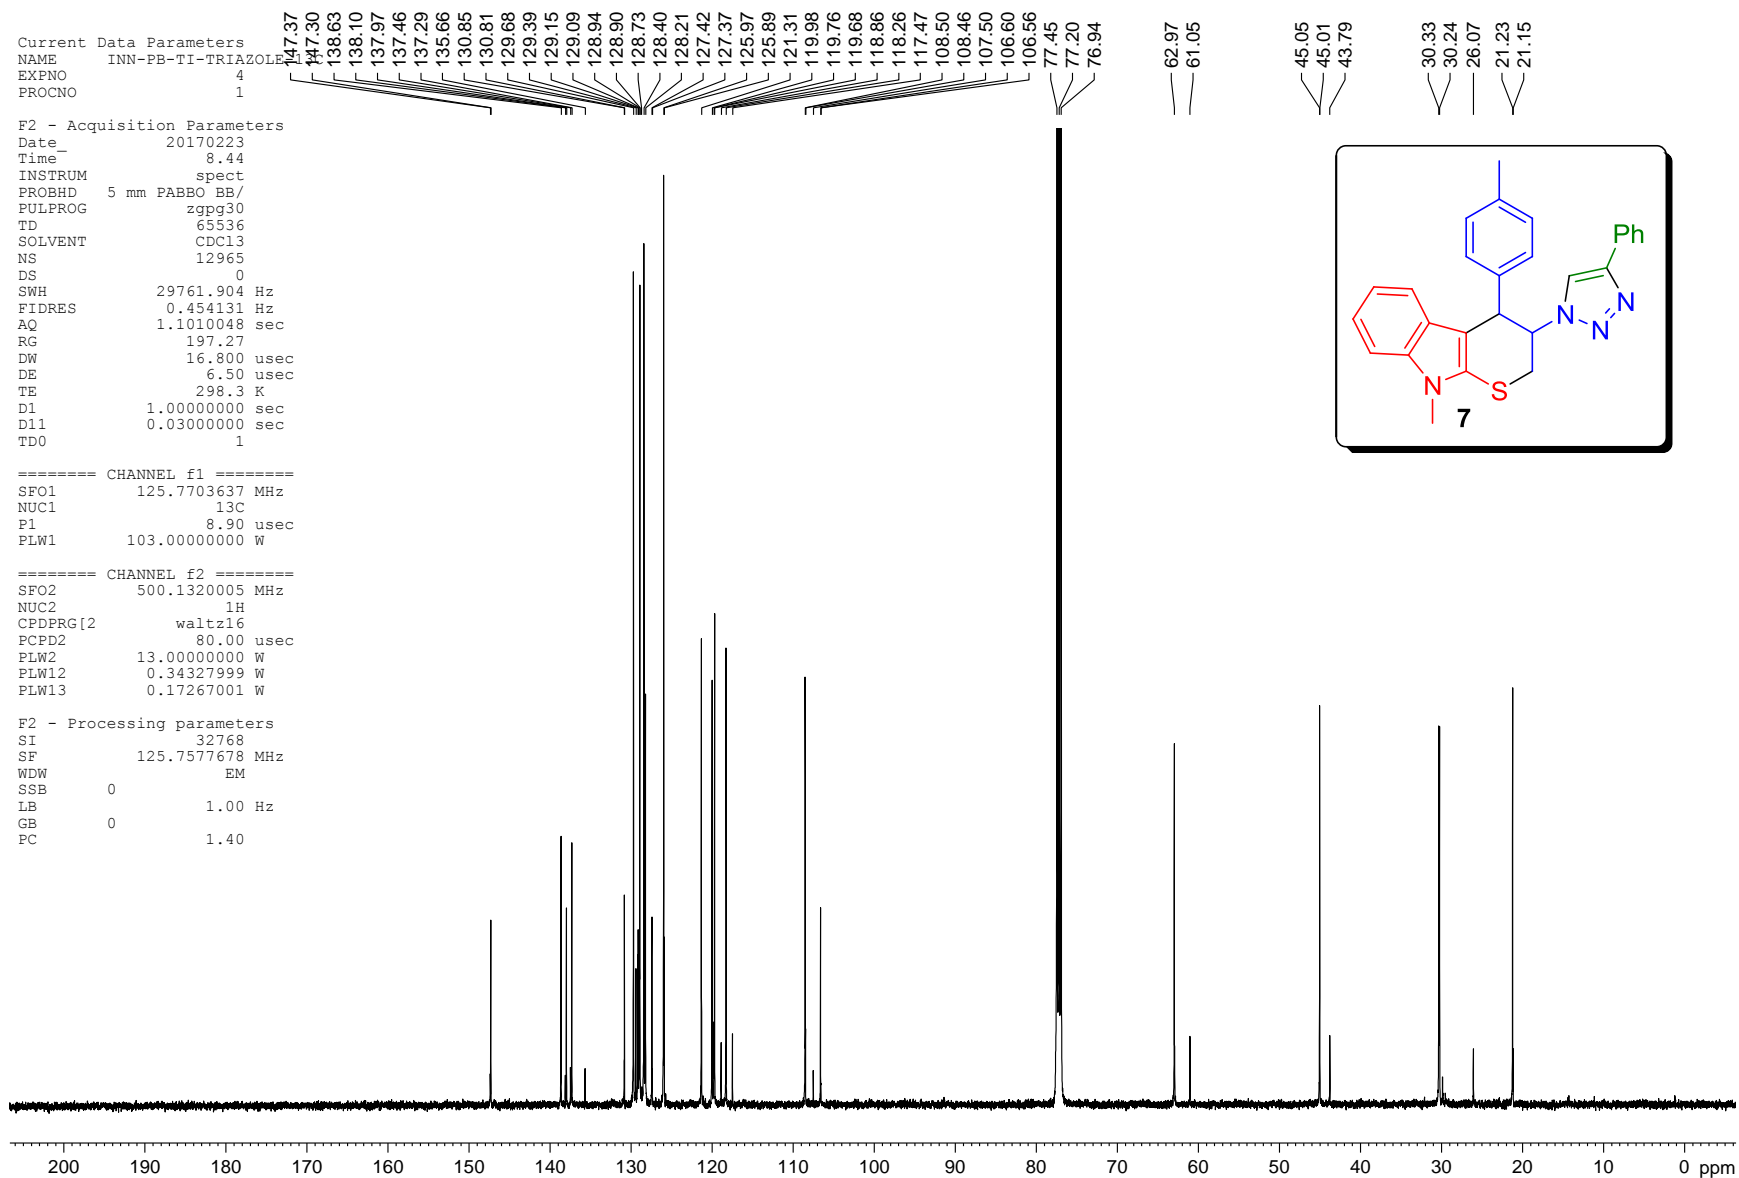Figure S65.  $^{13}\text{C}$  NMR Spectrum of **7** (major + minor, dr 86:14)

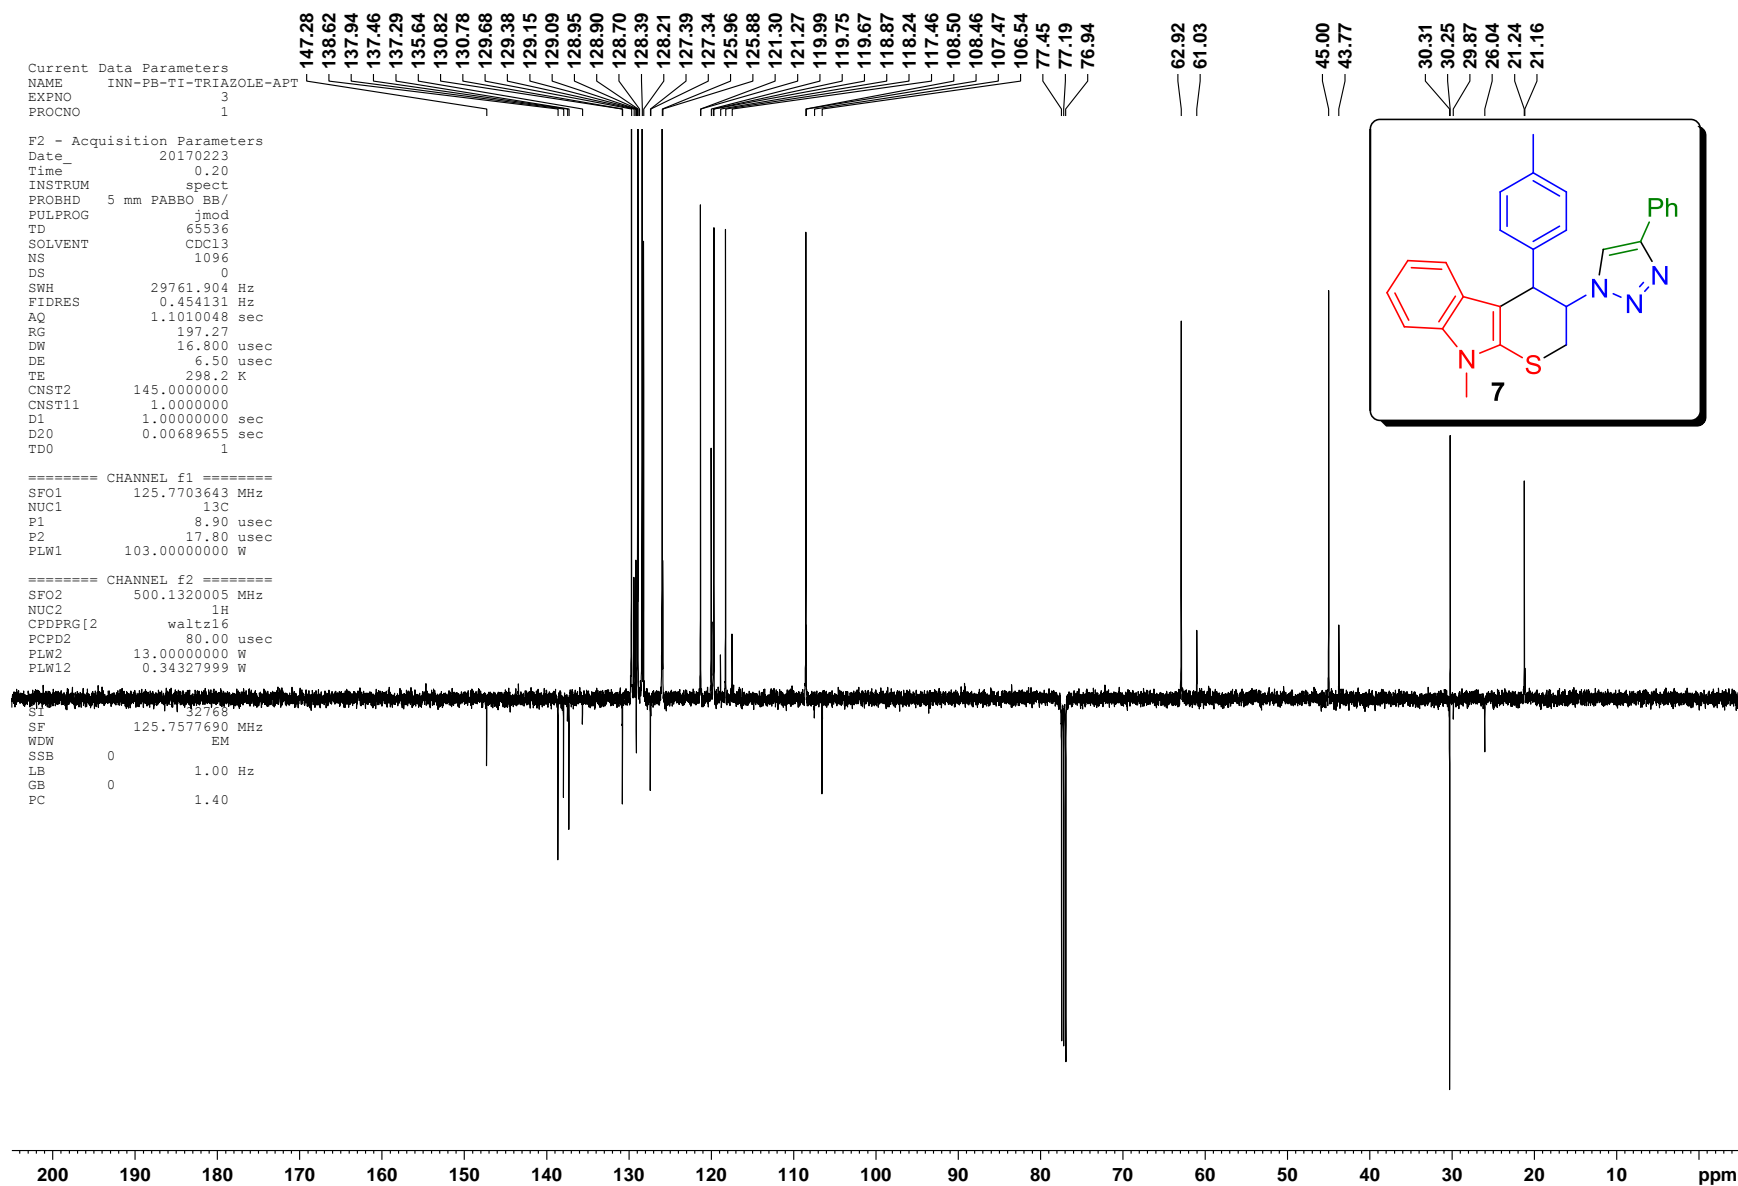Figure S66. <sup>13</sup>C-APT NMR Spectrum of 7 (major + minor, dr 86:14)

Current Data Parameters  
NAME INN-PB-384-1H  
EXPNO 1  
PROCNO 1

F2 - Acquisition Parameters  
Date\_ 20191126  
Time\_ 15.05  
INSTRUM spect  
PROBHD 5 mm PABBO BB/  
PULPROG zg30  
TD 65536  
SOLVENT CDCl3  
NS 16  
DS 0  
SWH 10000.000 Hz  
FIDRES 0.152588 Hz  
AQ 3.2767999 sec  
RG 30.72  
DW 50.000 usec  
DE 6.50 usec  
TE 296.4 K  
D1 1.00000000 sec  
TD0 1

==== CHANNEL f1 =====  
SFO1 500.1330885 MHz  
NUC1 1H  
P1 13.35 usec  
PLW1 16.00000000 W

F2 - Processing parameters  
SI 65536  
SF 500.1300064 MHz  
WDW EM  
SSB 0  
LB 0.30 Hz  
GB 0  
PC 1.00

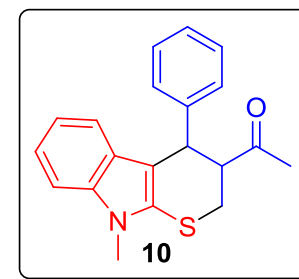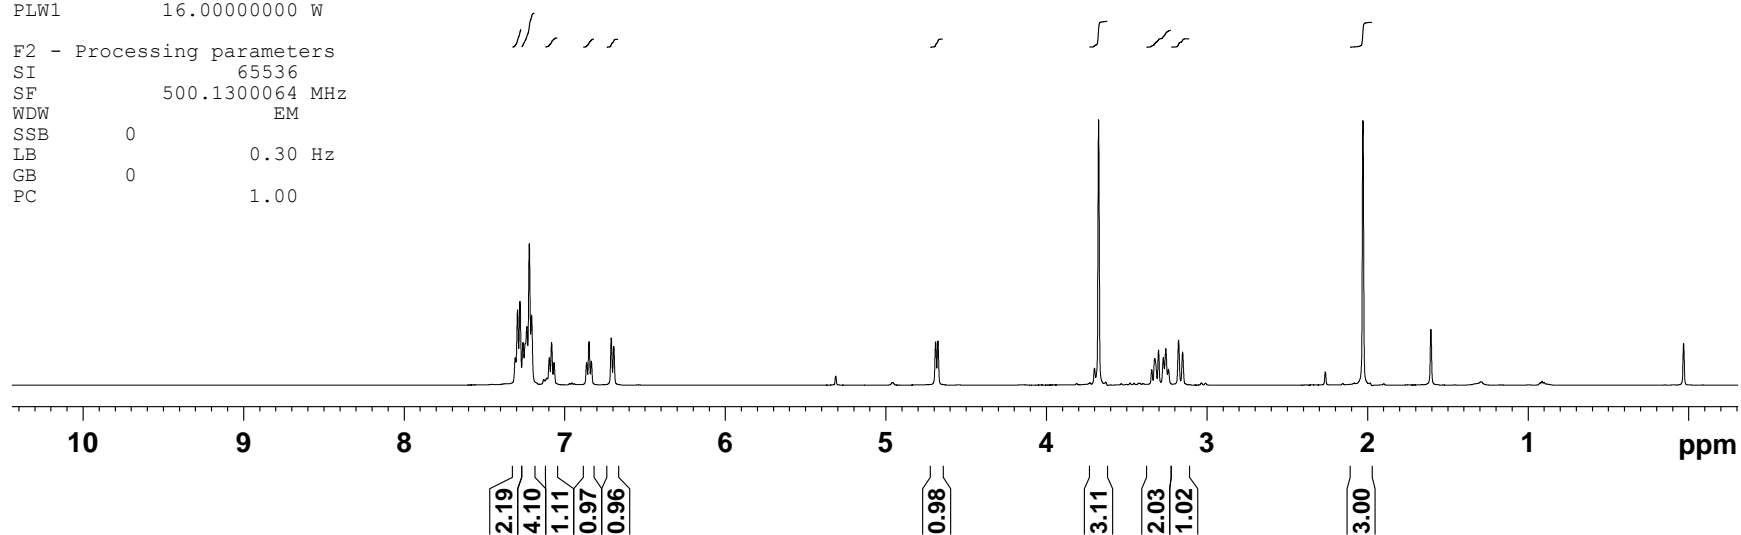

Figure S67. <sup>1</sup>H NMR Spectrum of 10 (major + minor, dr > 95:05)

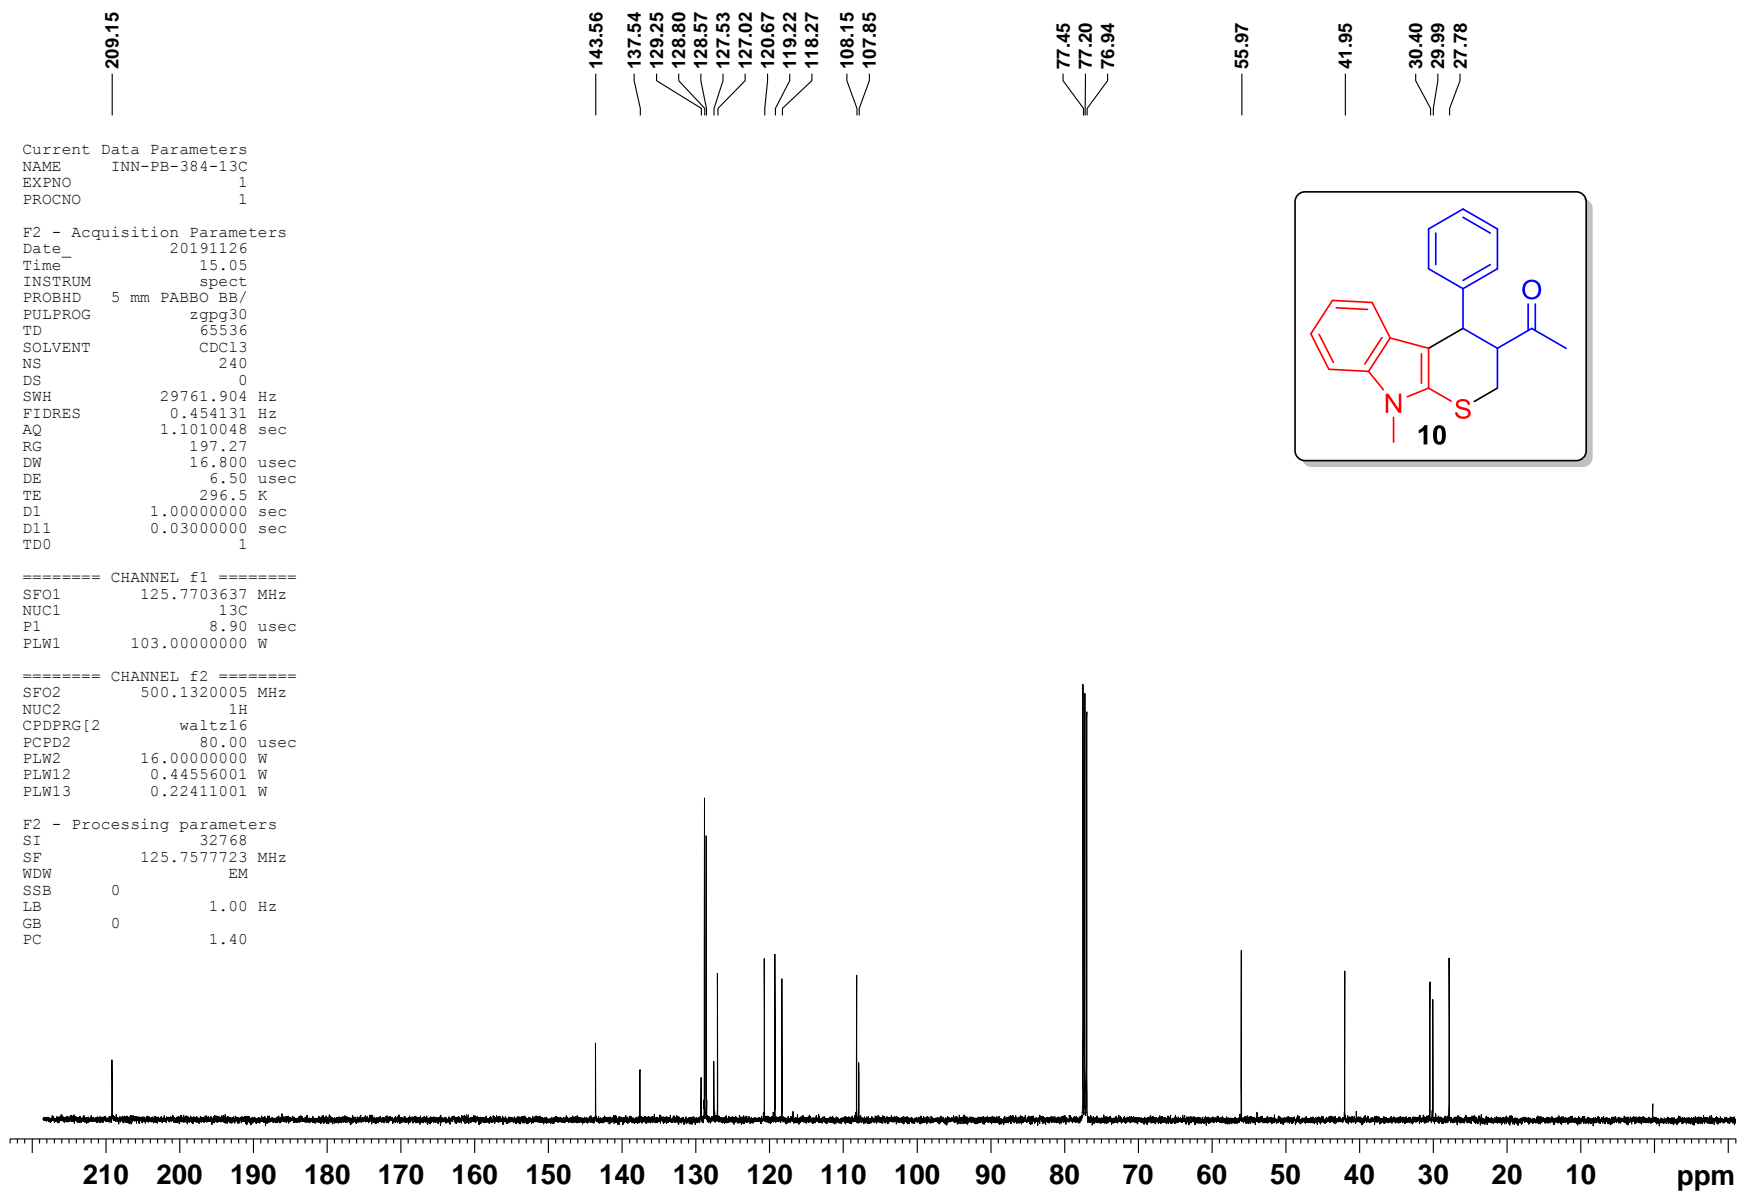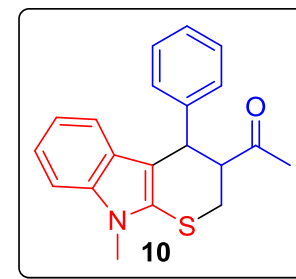

Figure S68. <sup>13</sup>C NMR Spectrum of 10 (major + minor, > dr 95:05)

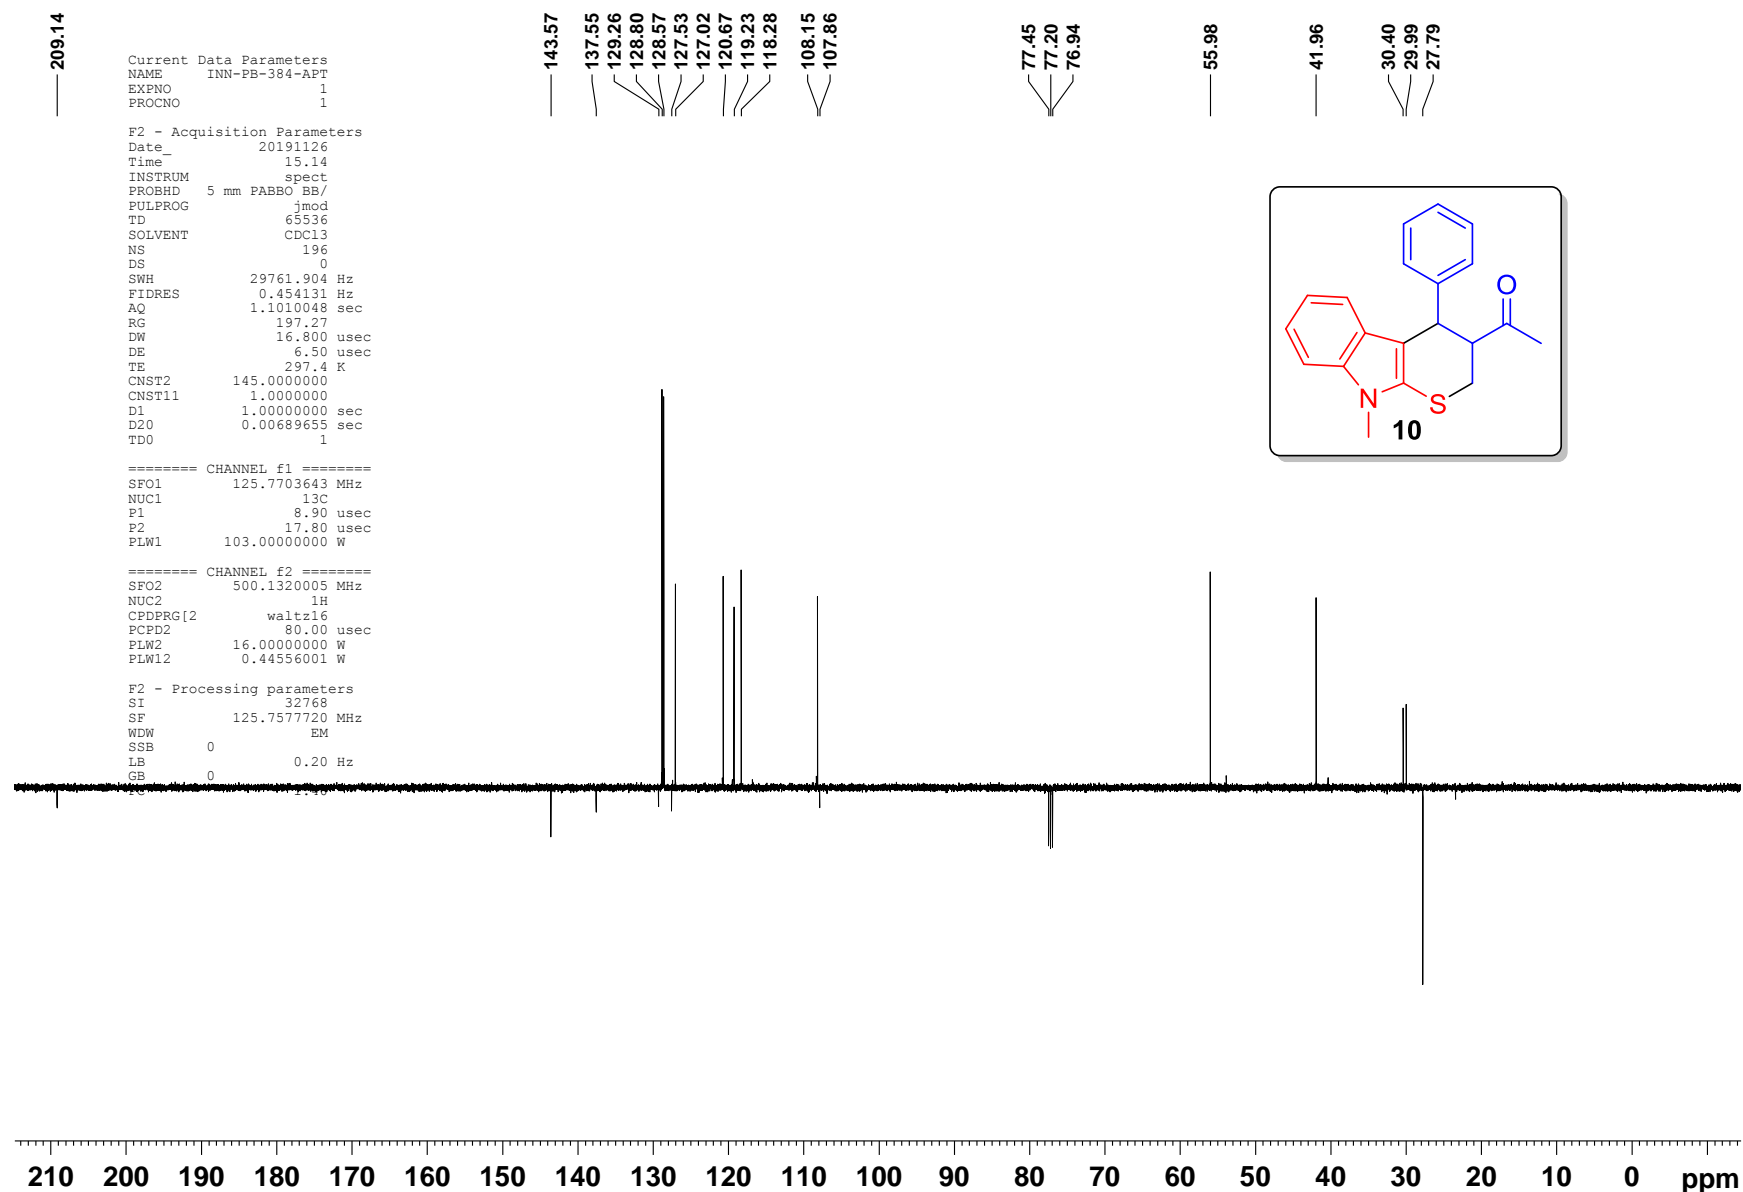Figure S69. <sup>13</sup>C-APT NMR Spectrum of 10 (major + minor, dr 95:05)



**Table S1.** Crystal data and structure refinement for thiopyranoindole **3j**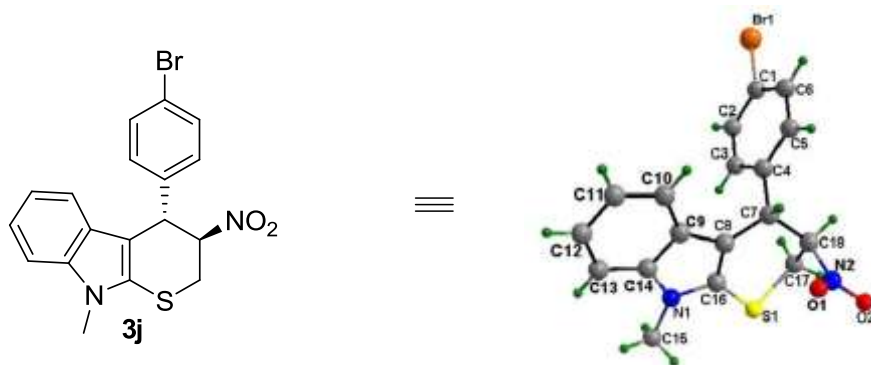

|                                 |                                          |                        |
|---------------------------------|------------------------------------------|------------------------|
| Identification code             | INN-PB-86C                               |                        |
| Empirical formula               | $C_{18}H_{15}BrN_2O_2S$                  |                        |
| Formula weight                  | 403.29                                   |                        |
| Temperature                     | 293(2) K                                 |                        |
| Wavelength                      | 0.71070 Å                                |                        |
| Crystal system, space group     | Trigonal, R -3                           |                        |
| Unit cell dimensions            | $a = 29.728(9)$ Å                        | $\alpha = 90^\circ$ .  |
|                                 | $b = 29.728(9)$ Å                        | $\beta = 90^\circ$ .   |
|                                 | $c = 9.928(3)$ Å                         | $\gamma = 120^\circ$ . |
| Volume                          | $7598(4)$ Å <sup>3</sup>                 |                        |
| Z, Density (calculated)         | 18, 1.586 Mg/m <sup>3</sup>              |                        |
| Absorption coefficient          | $2.571$ mm <sup>-1</sup>                 |                        |
| F(000)                          | 3672                                     |                        |
| Crystal size                    | 0.066 x 0.086 x 0.434 mm <sup>3</sup>    |                        |
| Theta range for data collection | 3.51 to 24.99°.                          |                        |
| Index ranges                    | -35 ≤ h ≤ 34, -35 ≤ k ≤ 35, -11 ≤ l ≤ 11 |                        |
| Reflections collected           | 19656                                    |                        |
| Independent reflections         | 2968 [R(int) = 0.1924]                   |                        |
| Completeness to theta           | = 24.99° 99.8 %                          |                        |

|                                      |                                       |
|--------------------------------------|---------------------------------------|
| Absorption correction                | Numerical                             |
| Refinement method                    | Full-matrix least-squares on $F^2$    |
| Data / restraints / parameters       | 2968 / 0 / 217                        |
| Goodness-of-fit on $F^2$             | 1.115                                 |
| Final R indices [ $I > 2\sigma(I)$ ] | R1 = 0.0572, wR2 = 0.1497             |
| R indices (all data)                 | R1 = 0.0630, wR2 = 0.1566             |
| Largest diff. peak and hole          | 1.145 and -0.822 e. $\text{\AA}^{-3}$ |
